# Supplementary material for: An iodine/DMSO-catalyzed sequential one-pot approach to 2,4,5-trisubstituted-1H-imidazoles from α-methylene ketones
Source: PubMed Central journal article supplement — RSC Adv. 2018 Nov 7;8(66):37557–63. doi: 10.1039/c8ra07238h (PMC9089320; doi:10.1039/c8ra07238h), 2018-11-07

*Electronic Supplementary Information*

**An Iodine/DMSO-catalyzed sequential one-pot approach to 2, 4, 5-trisubstituted-1*H*-imidazoles from  $\alpha$ -methylene ketones**

Janeeka Jayram and Vineet Jeena\*

\* School of Chemistry and Physics, University of KwaZulu-Natal, Scottsville,

Pietermaritzburg, 3209, South Africa. Email: [jeenav1@ukzn.ac.za](mailto:jeenav1@ukzn.ac.za)

## I. General Information

All reagents were purchased without further purification. All  $^1\text{H}$  and  $^{13}\text{C}$  Nuclear Magnetic Resonance (NMR) spectra were recorded on a Bruker Advance III spectrometer operating at either 400 or 500 MHz. Chemical shifts ( $\delta$ ) were reported in ppm using the Dimethyl Sulfoxide- $d_6$  (DMSO- $d_6$ ) residual peak ( $\delta$  2.50) for  $^1\text{H}$  NMR. Chemical shifts of  $^{13}\text{C}$  NMR were reported relative to DMSO- $d_6$  ( $\delta$  39.51). The following abbreviations were used to describe peak splitting patterns when appropriate: br = broad, s = singlet, d = doublet, t = triplet, q = quartet, m = multiplet. Coupling constants, J, were reported in Hertz unit (Hz). High-resolution electron-spray ionization (ESI) mass spectra were recorded on a time-of-flight (TOF) micromass spectrometer. Infra-Red (IR) spectra were recorded on Carey 630 FTIR. Absorption maxima are expressed in wavenumbers ( $\text{cm}^{-1}$ ). Melting points were determined using Kofler hot-stage melting apparatus.

## II. Characterization of Imidazole Derivatives

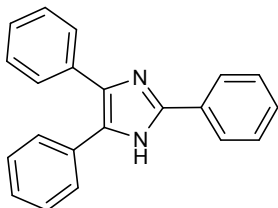

**2,4,5-Triphenyl-1H-imidazole (3a, C<sub>21</sub>H<sub>16</sub>N<sub>2</sub>, 3a, 82%)<sup>1, 2</sup>**: white solid. **Mp** 271-273 °C;  $\nu_{\max}$  (neat, cm<sup>-1</sup>): 3037, 2852, 1586, 1488, 1322; <sup>1</sup>H NMR (400 MHz, DMSO-D<sub>6</sub>): 12.69(s, 1H), 8.12-8.10 (d,  $J$  = 7.64, 2H), 7.58-7.56 (m, 2H), 7.53-7.50 (m, 2H), 7.48-7.43 (m, 4H), 7.39-7.36 (m, 2H), 7.32-7.29 (m, 2H), 7.24-7.22 (m, 1H); <sup>13</sup>C (100 MHz, DMSO-D<sub>6</sub>): 145.5, 137.1, 135.2, 131.1, 130.3, 128.6, 128.4, 128.2, 128.1, 127.7, 127.1, 126.5, 125.2; **ESI-MS ( $m/z$ )**: 297.1396 (100) [M+H]<sup>+</sup>, 298.1432 (25).

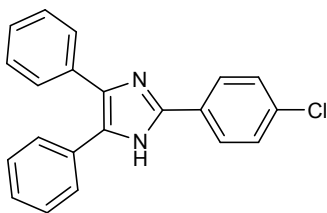

**2-(4-Chlorophenyl)-4,5-diphenyl-1H-imidazole (3b, C<sub>21</sub>H<sub>15</sub>ClN<sub>2</sub>, 86%)<sup>3, 4</sup>**: white solid. **Mp** 262-263 °C;  $\nu_{\max}$  (neat, cm<sup>-1</sup>): 3057, 2961, 1599, 1483, 1323, 764; <sup>1</sup>H NMR (400 MHz, DMSO-D<sub>6</sub>): 12.76 (s, 1H), 8.11-8.09 (d,  $J$  = 6.47 Hz, 2H), 7.55-7.53 (m, 6H), 7.43-7.32 (m, 6H); <sup>13</sup>C (100 MHz, DMSO-D<sub>6</sub>): 144.4, 137.3, 135.0, 132.7, 131.0, 129.2, 128.7, 128.6, 128.4, 127.1, 126.8; **ESI-MS ( $m/z$ )**: 331.1011 (100) [M+H]<sup>+</sup>, 333.0989 (41).

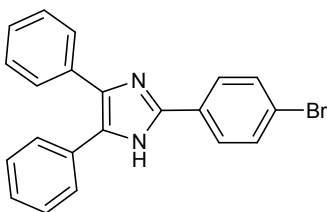

**2-(4-Bromophenyl)-4,5-diphenyl-1H-imidazole (3c, C<sub>21</sub>H<sub>15</sub>BrN<sub>2</sub>, 82%)<sup>3, 4</sup>**: white solid. **Mp** 250-251 °C;  $\nu_{\max}$  (neat, cm<sup>-1</sup>): 3057, 1587, 1491, 1382, 724; <sup>1</sup>H NMR (400 MHz, DMSO-D<sub>6</sub>): 12.77 (s, 1H), 8.05-8.03 (d,  $J$  = 6.18 Hz, 2H), 7.69-7.67 (d,  $J$

= 6.38 Hz, 2H), 7.53 (m, 4H), 7.44-7.24 (m, 6H);  $^{13}\text{C}$  (100 MHz,  $\text{DMSO-}d_6$ ): 144.4, 137.3, 135.0, 131.6, 130.9, 129.5, 128.6, 128.4, 128.2, 127.8, 127.1, 126.6, 121.4; **ESI-MS** ( $m/z$ ): 375.0503 (100)  $[\text{M}+\text{H}]^+$ , 376.0532 (25), 377.0487 (96), 378.0519 (23).

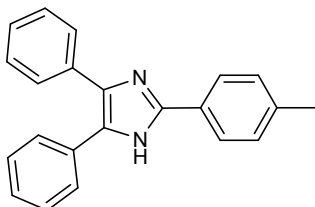

**4,5-diphenyl-2-(p-tolyl)-1H-imidazole (3d,  $\text{C}_{22}\text{H}_{18}\text{N}_2$ , 80%)<sup>5</sup>** :

white solid. **Mp** 231-233 °C;  $\nu_{\text{max}}$  (neat,  $\text{cm}^{-1}$ ): 3036, 2870, 1602, 1493, 1449;  $^1\text{H}$  NMR (400 MHz,  $\text{DMSO-}d_6$ ): 12.61 (s, 1H), 7.99-7.97 (m, 2H), 7.53-7.23 (m, 12H), 2.35 (s, 3H);  $^{13}\text{C}$  (100 MHz,  $\text{DMSO-}d_6$ ): 145.7, 137.7, 137.0, 135.3, 131.2, 129.3, 128.7, 128.5, 128.2, 128.0, 127.7, 127.1, 126.5, 125.2, 20.9; **ESI-MS** ( $m/z$ ): 310.1429 (25)  $[\text{M}]^+$ , 309.1393 (100)  $[\text{M}-\text{H}]^+$ , 311.1581 (10).

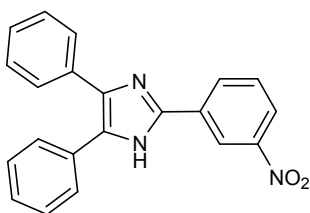

**2-(3-Nitrophenyl)-4,5-diphenyl-1H-imidazole (3e,  $\text{C}_{21}\text{H}_{15}\text{N}_3\text{O}_2$ , 75%)<sup>3, 4</sup>** :

yellow solid. **Mp** 315-317 °C;  $\nu_{\text{max}}$  (neat,  $\text{cm}^{-1}$ ): 3059, 2861, 1584, 1522, 1480, 1347;  $^1\text{H}$  NMR (400 MHz,  $\text{DMSO-}d_6$ ): 13.08 (s, 1H), 8.95 (s, 1H), 8.52-8.50 (d,  $J = 6.31$  Hz, 1H), 8.21-8.19 (d,  $J = 8.14$  Hz, 1H), 7.79-7.75 (t,  $J = 8.00$  Hz, 1H), 7.55-7.54 (d,  $J = 7.09$  Hz, 4H), 7.39-7.37 (m, 6H);  $^{13}\text{C}$  (100 MHz,  $\text{DMSO-}d_6$ ): 148.4, 143.4, 131.8, 131.1, 130.4, 128.5, 127.6, 122.5, 119.4; **ESI-MS** ( $m/z$ ): 342.1248 (100)  $[\text{M}+\text{H}]^+$ , 343.1281 (25).

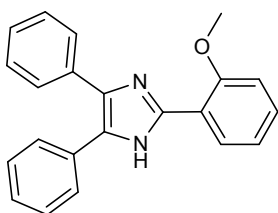

**2-(2-Methoxyphenyl)-4,5-diphenyl-1H-imidazole (3f,  $\text{C}_{22}\text{H}_{18}\text{N}_2\text{O}$ , 63%)<sup>2</sup>** :

white solid. **Mp** 224-226 °C;  $\nu_{\text{max}}$  (neat,  $\text{cm}^{-1}$ ): 3059, 2834, 1583, 1468, 1249, 1016;

**<sup>1</sup>H NMR (400 MHz, DMSO-*D*<sub>6</sub>):** 11.87 (s, 1H), 8.07-8.05 (d, *J* = 6.35 Hz, 1H), 7.55-7.53 (d, *J* = 7.56 Hz, 2H), 7.49-7.47 (m, 2H), 7.45-7.41 (t, *J* = 7.50 Hz, 2H), 7.38-7.37 (m, 2H), 7.31-7.27 (t, *J* = 7.36 Hz, 2H), 7.23-7.19 (m, 1H), 7.17-7.15 (m, 1H), 7.09-7.05 (t, *J* = 7.40 Hz, 1H), 3.93 (s, 3H); **<sup>13</sup>C (100 MHz, DMSO-*D*<sub>6</sub>):** 156.0, 143.1, 136.4, 135.3, 131.2, 129.7, 128.8, 128.6, 128.5, 128.1, 127.6, 127.4, 127.0, 126.4, 120.6, 118.9, 111.6, 55.5; **ESI-MS (*m/z*):** 327.1503 (100) [M+H]<sup>+</sup>, 328.1535 (30).

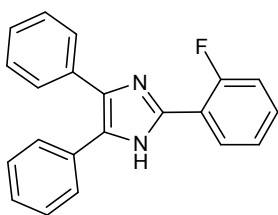

**2-(2-Fluorophenyl)-4,5-diphenyl-1*H*-imidazole (3g, C<sub>21</sub>H<sub>15</sub>FN<sub>2</sub>,**

**68%)<sup>6</sup>:** white solid. **Mp** 239-240 °C; **v<sub>max</sub> (neat, cm<sup>-1</sup>):** 3028, 2777, 1577, 1483, 1252, 1100; **<sup>1</sup>H NMR (400 MHz, DMSO-*D*<sub>6</sub>):** 12.57 (s, 1H), 8.03-7.99 (m, 1H), 7.56-7.54 (d, *J* = 7.32 Hz, 2H), 7.51-7.41 (m, 5H), 7.39-7.29 (m, 5H), 7.24-7.21 (m, 1H); **<sup>13</sup>C (100 MHz, DMSO-*D*<sub>6</sub>):** 160.1, 157.6, 140.8, 140.8, 137.2, 135.0, 130.9, 130.4, 130.3, 129.6, 129.6, 128.5, 128.2, 127.8, 127.1, 126.6, 124.7, 124.6, 118.7, 118.6, 116.3, 116.1; **ESI-MS (*m/z*):** 315.1305 (100) [M+H]<sup>+</sup>, 316.1337 (26).

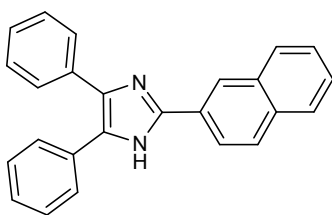

**2-(naphthalen-2-yl)-4,5-diphenyl-1*H*-imidazole (3h, C<sub>25</sub>H<sub>18</sub>N<sub>2</sub>,**

**74%)<sup>7</sup>:** white solid. **Mp** 274-275 °C; **v<sub>max</sub> (neat, cm<sup>-1</sup>):** 3057, 2970, 1582, 1500, 1341; **<sup>1</sup>H NMR (400 MHz, DMSO-*D*<sub>6</sub>):** 12.86 (s, 1H), 8.63 (s, 1H), 8.29-8.26 (d, *J* = 6.10 Hz, 1H), 8.02-7.93 (m, 3H), 7.59-7.51 (m, 6H), 7.39 (m, 6H); **<sup>13</sup>C (100 MHz, DMSO-*D*<sub>6</sub>):** 145.5, 133.0, 132.7, 128.4, 128.2, 128.1, 127.8, 127.7, 126.7, 126.3, 123.7, 123.5; **ESI-MS (*m/z*):** 347.1553 (100) [M+H]<sup>+</sup>, 348.1586 (30).

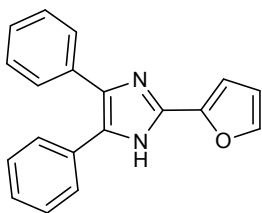

**2-(2-Furan-2-yl)-4,5-diphenyl-1H-imidazole (3i, C<sub>19</sub>H<sub>14</sub>N<sub>2</sub>O, 42%)<sup>8</sup>:**

brown solid. **Mp** 229-231 °C;  $\nu_{\max}$  (neat, cm<sup>-1</sup>): 3056, 2726, 1602, 1485, 1014; <sup>1</sup>H NMR (400 MHz, DMSO-D<sub>6</sub>): 12.80 (s, 1H), 7.80 (m, 1H), 7.53-7.47 (m, 4H), 7.44-7.40 (m, 2H), 7.38-7.34 (m, 1H), 7.31-7.28 (m, 2H), 7.24-7.21 (m, 1H), 6.98-6.97 (d, *J* = 3.10 Hz, 1H), 6.64 (m, 1H); <sup>13</sup>C (100 MHz, DMSO-D<sub>6</sub>): 145.7, 143.0, 138.5, 137.0, 135.0, 130.8, 128.6, 128.3, 128.2, 127.8, 127.5, 127.1, 126.6, 111.8, 107.4; **ESI-MS** (*m/z*): 287.1189 (100) [M+H]<sup>+</sup>, 288.1223 (24).

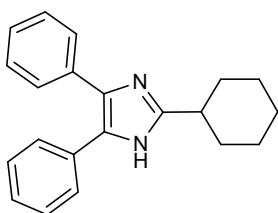

**2-(Cyclohexyl)-4,5-diphenyl-1H-imidazole (3j, C<sub>21</sub>H<sub>22</sub>N<sub>2</sub>, 51%)<sup>2</sup>:**

pale brown solid. **Mp** 242-244 °C;  $\nu_{\max}$  (neat, cm<sup>-1</sup>): 3032, 2926, 2848, 1602, 1534, 1499, 1447; <sup>1</sup>H NMR (400 MHz, DMSO-D<sub>6</sub>): 11.90 (s, 1H), 7.48-7.46 (m, 2H), 7.39-7.35 (m, 4H), 7.31-7.23 (m, 3H), 7.18-7.14 (m, 1H), 2.73-2.66 (m, 1H), 1.98-1.95 (m, 2H), 1.81-1.78 (m, 2H), 1.70-1.67 (m, 1H), 1.64-1.54 (m, 2H), 1.40-1.20 (m, 3H); <sup>13</sup>C (100 MHz, DMSO-D<sub>6</sub>): 152.3, 135.8, 135.0, 131.6, 128.5, 128.0, 127.8, 127.1, 127.0, 126.0, 125.7, 37.2, 31.5, 25.7, 25.6; **ESI-MS** (*m/z*): 303.1862 (100) [M+H]<sup>+</sup>, 304.1895 (25).

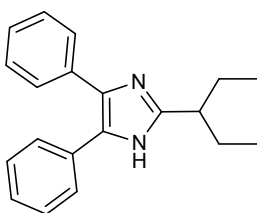

**2-(pentan-3-yl)-4,5-diphenyl-1H-imidazole (3k, C<sub>20</sub>H<sub>22</sub>N<sub>2</sub>, 35%)<sup>9</sup>:**

white solid. **Mp** 240-242 °C;  $\nu_{\max}$  (neat, cm<sup>-1</sup>): 3064, 3030, 2957, 2925, 2869, 1601, 1498,

1333;  $^1\text{H NMR}$  (400 MHz,  $\text{DMSO-}D_6$ ): 11.92 (s, 1H), 7.51-7.49 (m, 2H), 7.42-7.36 (m, 4H), 7.31-7.23 (m, 3H), 7.18-7.16 (m, 1H), 2.62-2.55 (m, 1H), 1.79-1.62 (m, 4H), 0.86-0.82 (m, 6H);  $^{13}\text{C}$  (100 MHz,  $\text{DMSO-}D_6$ ): 151.2, 135.8, 135.2, 131.7, 129.5, 129.4, 128.5, 128.0, 127.8, 127.0, 126.9, 126.0, 125.6, 42.2, 26.6, 12.0; **ESI-MS** ( $m/z$ ): 289.1707 (100)  $[\text{M-H}]^+$ , 290.1738 (25)  $[\text{M}]^+$ .

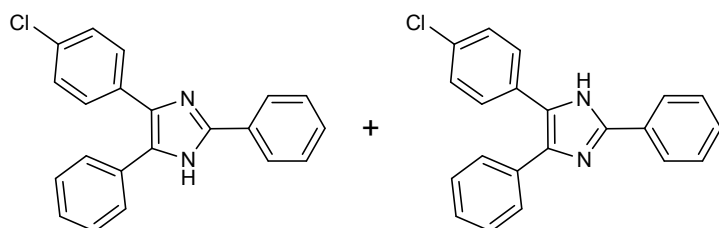

**5-(4-Chlorophenyl)-4,5-diphenyl-**

**1H-imidazole (3n,  $\text{C}_{21}\text{H}_{15}\text{ClN}_2$ , 84%)<sup>10</sup>**: white solid. **Mp** 241-243 °C;  $\nu_{\text{max}}$  (neat,  $\text{cm}^{-1}$ ): 3038, 2969, 1541, 1485, 1091, 768;  $^1\text{H NMR}$  (400 MHz,  $\text{DMSO-}D_6$ ): 12.74-12.71 (s, 1H), 8.09-8.07 (d,  $J = 6.16$  Hz, 2H), 7.57-7.25 (m, 12H);  $^{13}\text{C}$  (100 MHz,  $\text{DMSO-}D_6$ ): 145.9, 145.7, 137.7, 135.8, 135.0, 134.0, 132.3, 131.0, 130.8, 130.2, 130.2, 130.0, 129.9, 128.8, 128.7, 128.6, 128.6, 128.4, 128.4, 128.3, 128.1, 127.3, 127.0, 126.8, 125.3, 125.2; **ESI-MS** ( $m/z$ ): 331.1010  $[\text{M+H}]^+$ , 332.1042 (25).

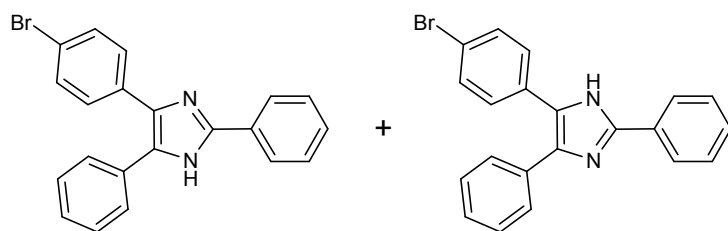

**5-(4-Bromophenyl)-4,5-diphenyl-**

**1H-imidazole (3o,  $\text{C}_{21}\text{H}_{15}\text{BrN}_2$ , 78%)<sup>10</sup>**: white solid. **Mp** 253-255 °C;  $\nu_{\text{max}}$  (neat,  $\text{cm}^{-1}$ ): 3049, 2845, 1596, 1482, 1010, 767;  $^1\text{H NMR}$  (400 MHz,  $\text{DMSO-}D_6$ ): 12.77 (s, 1H), 8.10-8.08 (d,  $J = 6.18$  Hz, 2H), 7.62-7.27 (m, 12H);  $^{13}\text{C}$  (100 MHz,  $\text{DMSO-}D_6$ ): 145.9, 145.7, 137.8, 135.8, 135.0, 134.4, 131.6, 131.2, 130.8, 130.2, 128.9, 128.8, 128.7, 128.6, 128.4, 128.1, 127.3, 127.0, 126.8, 125.3, 120.8, 119.5; **ESI-MS** ( $m/z$ ): 373.0344 (100)  $[\text{M-H}]^+$ , 374.0378 (24), 375.0326 (100)  $[\text{M+H}]^+$ .

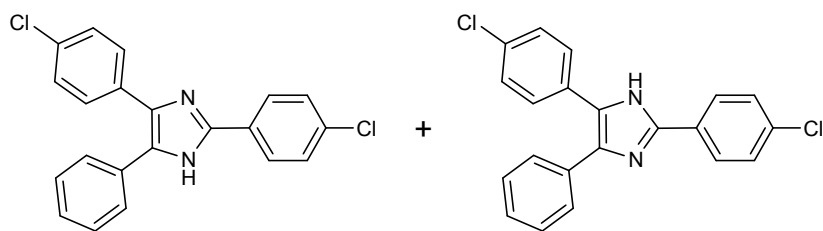

**2,5-Bis-(4-chlorophenyl)-4-**

**phenyl-1*H*-imidazole (3p, C<sub>21</sub>H<sub>14</sub>Cl<sub>2</sub>N<sub>2</sub>, 76%)<sup>10</sup>**: white solid. **Mp** 250-252 °C;  $\nu_{\max}$  (neat,  $\text{cm}^{-1}$ ): 3060, 2835, 1599, 1500, 1478, 1445, 1087, 830;  $^1\text{H NMR}$  (400 MHz, DMSO- $\text{D}_6$ ): 12.81 (s, 1H), 8.11-8.09 (d,  $J = 8.24$  Hz, 2H), 7.55-7.41 (m, 11H);  $^{13}\text{C}$  (100 MHz, DMSO- $\text{D}_6$ ): 144.6, 132.8, 129.0, 128.7, 128.6, 128.4, 126.9; **ESI-MS** ( $m/z$ ): 363.0455 (100)  $[\text{M}-\text{H}]^+$ , 364.0493 (24)  $[\text{M}]^+$ , 365.0426 (67)  $[\text{M}+\text{H}]^+$ .

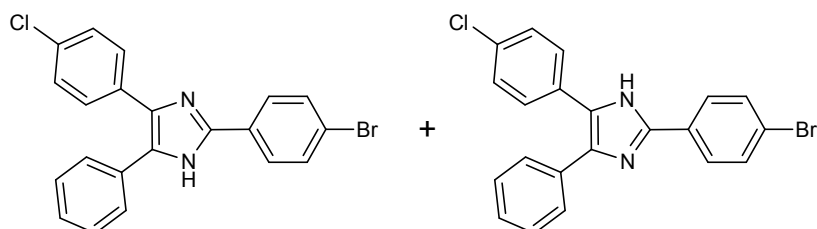

**2-(4-Bromophenyl)-5-(4-**

**chlorophenyl)-4-phenyl-1*H*-imidazole (3q, C<sub>21</sub>H<sub>14</sub>BrClN<sub>2</sub>, 72%)<sup>10</sup>**: white solid. **Mp** 251-253 °C;  $\nu_{\max}$  (neat,  $\text{cm}^{-1}$ ): 3067, 2829, 1480, 1446, 1091, 830, 729;  $^1\text{H NMR}$  (400 MHz, DMSO- $\text{D}_6$ ): 12.82 (s, 1H), 8.03-8.01 (m, 2H), 7.69-7.67 (m, 2H), 7.52-7.41 (m, 9H);  $^{13}\text{C}$  (100 MHz, DMSO- $\text{D}_6$ ): 144.7, 131.8, 129.4, 129.0, 128.6, 128.2, 127.2, 125.4, 121.6; **ESI-MS** ( $m/z$ ): 406.9953 (80)  $[\text{M}-\text{H}]^+$ , 408.9936 (100)  $[\text{M}]^+$ , 409.9964 (32)  $[\text{M}+\text{H}]^+$ .

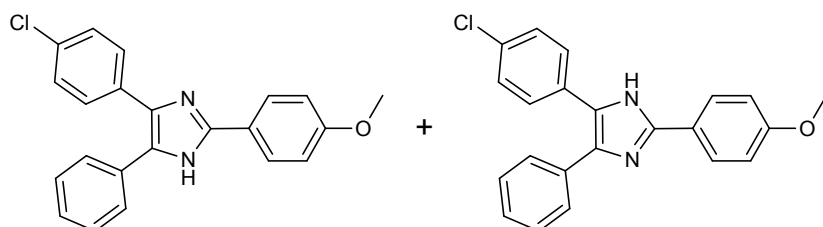

**5-(4-Chlorophenyl)-2-(4-**

**methoxyphenyl)-4-phenyl-1*H*-imidazole (3r, C<sub>22</sub>H<sub>17</sub>ClN<sub>2</sub>O, 66%)**: pale yellow solid. **Mp** 253-255 °C;  $\nu_{\max}$  (neat,  $\text{cm}^{-1}$ ): 3067, 2829, 1480, 1446, 1091, 830, 729;  $^1\text{H NMR}$  (400 MHz, DMSO- $\text{D}_6$ ): 12.55 (s, 1H), 8.02-8.00 (m, 2H), 7.52-7.38 (m, 9H), 7.05-7.03 (m, 2H), 3.82 (s,



3H);  $^{13}\text{C}$  (100 MHz,  $\text{DMSO-}d_6$ ):; ESI-MS ( $m/z$ ): 159.5, 145.8, 128.4, 126.7, 123.0, 114.1, 55.2; calcd for  $\text{C}_{22}\text{H}_{17}\text{ClN}_2\text{O}$  360.1029, found 361.1116  $[\text{M}+\text{H}]^+$ .

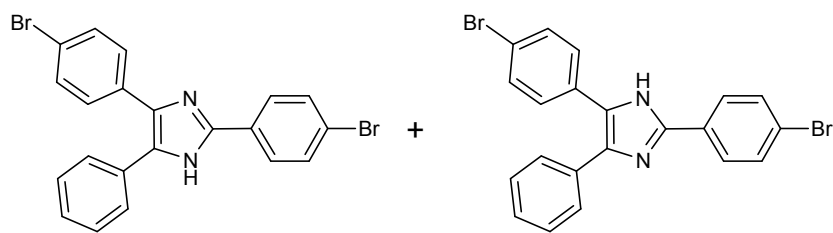

**2,5-Bis-(4-bromophenyl)-**

**4-phenyl-1H-imidazole (3s,  $\text{C}_{21}\text{H}_{14}\text{Br}_2\text{N}_2$ , 81%)**: white solid. Mp 252-255 °C;  $\nu_{\text{max}}$  (neat,  $\text{cm}^{-1}$ ): 3060, 2826, 1598, 1479, 1067, 826, 730;  $^1\text{H}$  NMR (400 MHz,  $\text{DMSO-}d_6$ ): 12.84 (s, 1H), 8.04-8.02 (d,  $J = 8.20$  Hz, 2H), 7.70-7.68 (d,  $J = 8.20$  Hz, 2H), 7.53-7.42 (m, 9H);  $^{13}\text{C}$  (100 MHz,  $\text{DMSO-}d_6$ ): 144.7, 131.7, 131.3, 129.4, 128.6, 127.1, 121.5; ESI-MS ( $m/z$ ): calcd for  $\text{C}_{21}\text{H}_{14}\text{Br}_2\text{N}_2$  451.9524, found 450.9443  $[\text{M}-\text{H}]^+$ .

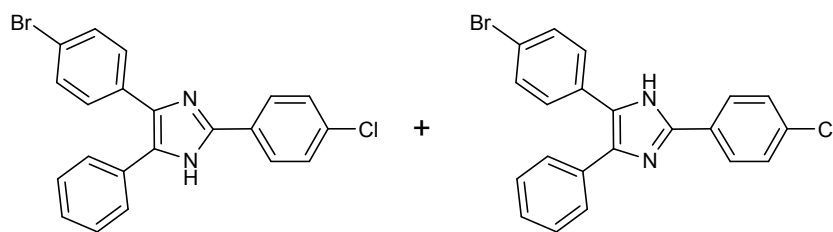

**2-(4-Chlorophenyl)-5-(4-**

**bromophenyl)-4-phenyl-1H-imidazole (3t,  $\text{C}_{21}\text{H}_{14}\text{BrClN}_2$ , 75%)**: white solid. Mp 249-251 °C;  $\nu_{\text{max}}$  (neat,  $\text{cm}^{-1}$ ): 3059, 2826, 1476, 1080, 823, 732;  $^1\text{H}$  NMR (400 MHz,  $\text{DMSO-}d_6$ ): 12.84 (s, 1H), 8.12-8.10 (d,  $J = 7.72$  Hz, 2H), 7.56-7.50 (m, 11H);  $^{13}\text{C}$  (100 MHz,  $\text{DMSO-}d_6$ ): 144.8, 144.7, 137.9, 136.0, 134.8, 134.2, 132.9, 131.6, 131.1, 130.6, 130.2, 130.0, 129.0, 128.9, 1288, 128.5, 128.3, 128.1, 127.3, 126.9, 120.9, 119.6; ESI-MS ( $m/z$ ): calcd for  $\text{C}_{21}\text{H}_{14}\text{BrClN}_2$  408.0029, found 406.9941  $[\text{M}-\text{H}]^+$ .

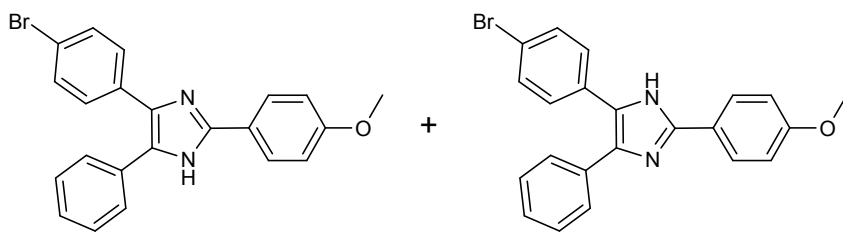

**5-(4-Bromophenyl)-2-(4-**

**methoxyphenyl)-4-phenyl-1*H*-imidazole (3u, C<sub>22</sub>H<sub>17</sub>BrN<sub>2</sub>O, 68%):** pale yellow solid. **Mp** 251-253 °C;  $\nu_{\max}$  (neat, cm<sup>-1</sup>): 2960, 2832, 1607, 1481, 1246, 1173; <sup>1</sup>H NMR (400 MHz, DMSO-*D*<sub>6</sub>): 12.56 (s, 1H), 8.03-8.01 (m, 2H), 7.53-7.38 (m, 9H), 7.06-7.04 (m, 2H), 3.83 (s, 3H); <sup>13</sup>C (100 MHz, DMSO-*D*<sub>6</sub>): 159.5, 145.9, 131.2, 128.5, 128.4, 126.8, 123.0, 114.1, 55.2; ESI-MS (*m/z*): calcd for C<sub>22</sub>H<sub>17</sub>BrN<sub>2</sub>O 404.0524, found 403.0441 [M-H]<sup>+</sup>.

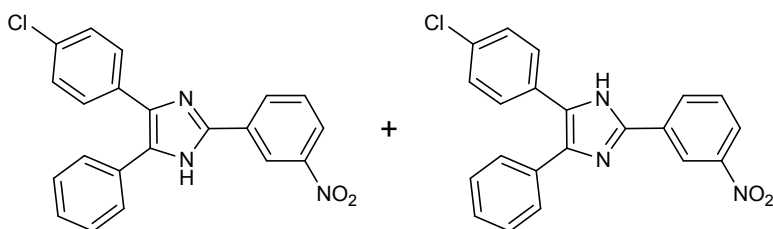

**4-(4-Chlorophenyl)-2-(3-**

**nitrophenyl)-5-phenyl-1*H*-imidazole (3v, C<sub>21</sub>H<sub>14</sub>ClN<sub>3</sub>O<sub>2</sub>, 85%):** yellow solid. **Mp** 247-249 °C;  $\nu_{\max}$  (neat, cm<sup>-1</sup>): 3070, 2858, 1518, 1476, 1345; <sup>1</sup>H NMR (400 MHz, DMSO-*D*<sub>6</sub>): 13.11 (s, 1H), 8.94 (s, 1H), 8.51-8.49 (d, *J* = 7.76 Hz, 1H), 8.21-8.19 (d, *J* = 8.08 Hz, 1H), 7.78-7.74 (t, *J* = 8.00 Hz, 1H), 7.57-7.53 (t, *J* = 8.08 Hz, 4H), 7.43 (m, 5H); <sup>13</sup>C (100 MHz, DMSO-*D*<sub>6</sub>): 148.3, 143.6, 131.7, 131.2, 130.3, 128.6, 128.4, 122.6, 119.4; ESI-MS (*m/z*): calcd for C<sub>21</sub>H<sub>14</sub>ClN<sub>3</sub>O<sub>2</sub> 375.0775, found 374.0701 [M-H]<sup>+</sup>.

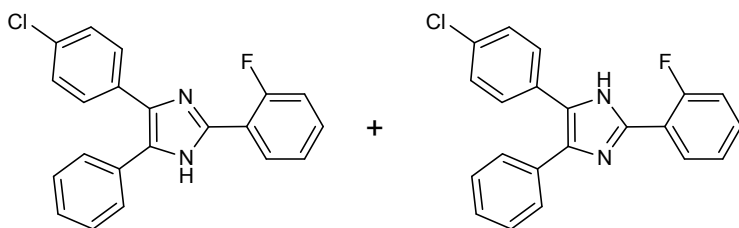

**4-(4-Chlorophenyl)-2-(2-**

**fluorophenyl)-5-phenyl-1*H*-imidazole (3w, C<sub>21</sub>H<sub>14</sub>ClFN<sub>2</sub>, 53%):** white solid. **Mp** 248-250 °C;  $\nu_{\max}$  (neat, cm<sup>-1</sup>): 2963, 2728, 1500, 1483, 1223, 1090; <sup>1</sup>H NMR (400 MHz, DMSO-*D*<sub>6</sub>): 12.61-12.60 (s, 1H), 8.02-7.99 (t, *J* = 7.48 Hz, 1H), 7.57-7.44 (m, 7H), 7.42-7.24 (m,

5H);  $^{13}\text{C}$  (100 MHz,  $\text{DMSO-}d_6$ ): 160.1, 157.6, 141.1, 141.0, 137.8, 135.9, 134.7, 133.8, 132.3, 131.1, 130.6, 130.5, 130.4, 130.2, 129.6, 129.6, 129.0, 128.7, 128.6, 128.3, 128.2, 128.1, 127.3, 126.8, 124.7, 124.7, 118.6, 118.4, 116.3, 116.1; **ESI-MS** ( $m/z$ ): calcd for  $\text{C}_{21}\text{H}_{14}\text{ClFN}_2$  348.0830, found 347.0760  $[\text{M-H}]^+$ .

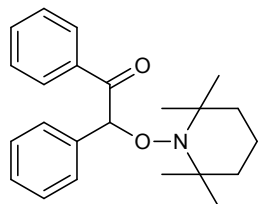

**1,2-diphenyl-2-((2,2,6,6-tetramethylpiperidin-1-yl)oxy)ethanone (6a,**

$\text{C}_{23}\text{H}_{29}\text{NO}_2$ , 46%)<sup>11</sup>: white solid. **Mp** 229-231 °C;  $\nu_{\text{max}}$  (neat,  $\text{cm}^{-1}$ ): 3068, 2922, 2852, 1667, 1596, 1446, 1262, 1042;  $^1\text{H}$  NMR (400 MHz,  $\text{DMSO-}d_6$ ): 8.01-7.99 (m, 2H), 7.43-7.39 (m, 3H), 7.34-7.30 (m, 2H), 7.22-7.18 (m, 2H), 7.14-7.10 (m, 1H), 5.92 (s, 1H), 1.38-1.37 (m, 6H), 1.24-1.11 (m, 6H), 0.92 (m, 3H), 0.73 (m, 3H);  $^{13}\text{C}$  (100 MHz,  $\text{DMSO-}d_6$ ): 198.3, 137.8, 135.3, 132.9, 129.3, 128.3, 127.5, 127.2, 93.5, 60.0, 59.8, 40.3, 33.6, 33.3, 20.3, 20.2, 17.0; **ESI-MS** ( $m/z$ ): 352.2287 (100)  $[\text{M+H}]^+$ , 353.232. (27)  $[\text{M+2H}]^+$ .

### III. References

1. C. –Y. Chen, W. –P. Hu, P. –C. Yan, G. C. Senadi and J. –J. Wang, *Org. Lett.*, 2013, **15**, 6116-6119
2. Z. Xie, J. Deng, Z. Qiu, J. Li and Q. Zhu, *Chem. Commun.*, 2016, **52**, 6467-6470
3. A. Hariharasubramanian and Y. D. Ravichandran, *RSC Adv.*, 2014, **4**, 54740-54746
4. A. Shaabani, A. Maleki and M. Behnam, *Synthetic Communications*, 2008, **39**, 102-110
5. A. Teimouri and A. N. Chermahini, *J. Mol. Catal. A: Chem.*, 2011, **346**, 39–45
6. T. S. Chundawat, N. Sharma, P. Kumari and S. Bhagat, *Synlett*, 2016, **27**, 404-408
7. J. Safari, S. D. Khalili and S. H. Banitaba, *Synthetic Communications*, 2011, **41**, 2359-2373
8. M. V. Marques, M. M. Ruthner, L. A. M. Fontoura and D. Russowsky, *J. Braz. Chem. Soc.*, 2012, **23**, 171-179
9. L. Kong, X. Lv, Q. Lin, X. Liu, Y. Zhou and Y. Jia, *Org. Process Res. Dev.*, 2010, **14**, 902-904
10. (a) V. Jeena and M. Mazibuko, *Heterocycles*, 2017, **94**, 1909–1922; (b) J. Jayram and V. Jeena, *Green Chem.*, 2017, **19**, 5841–5845
11. J. –W Yu, S. Mao and Y. –Q Wang, *Tetrahedron*, 2015, **56**, 1575-1580

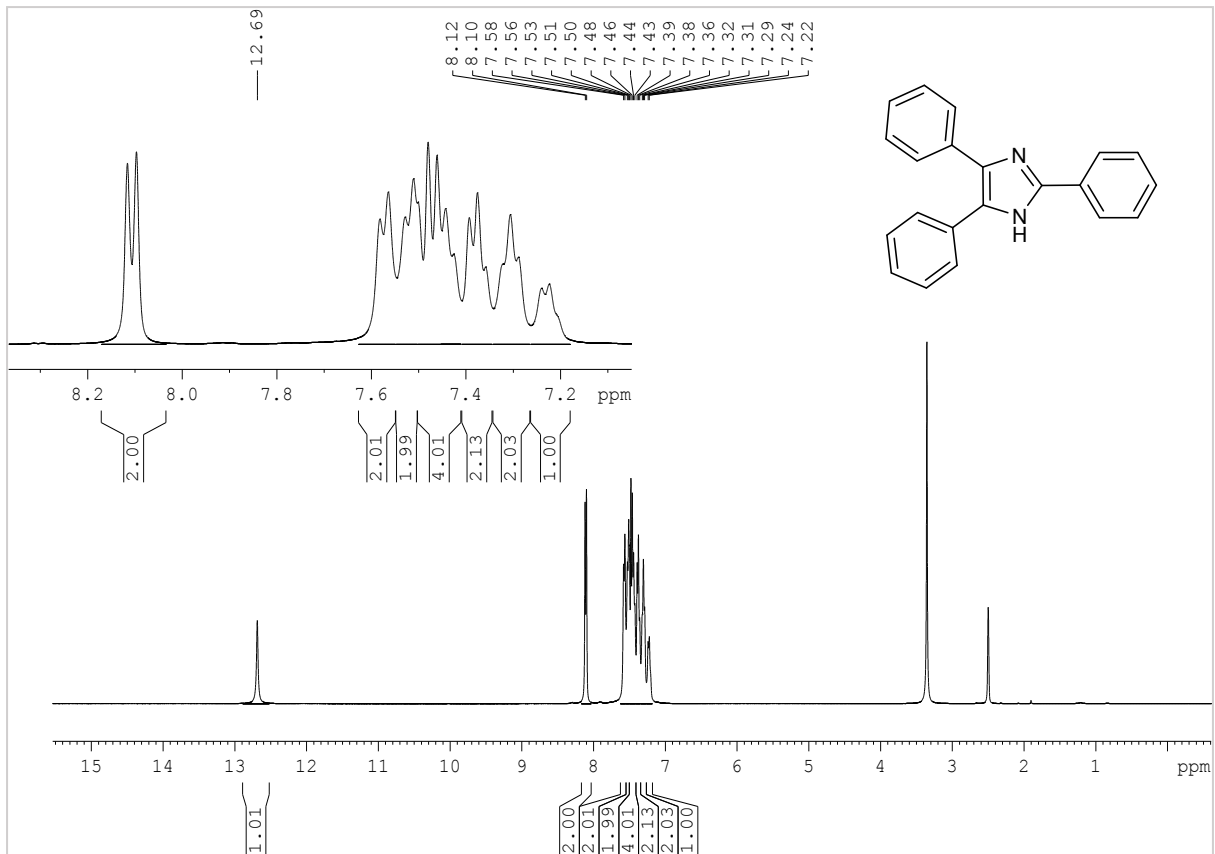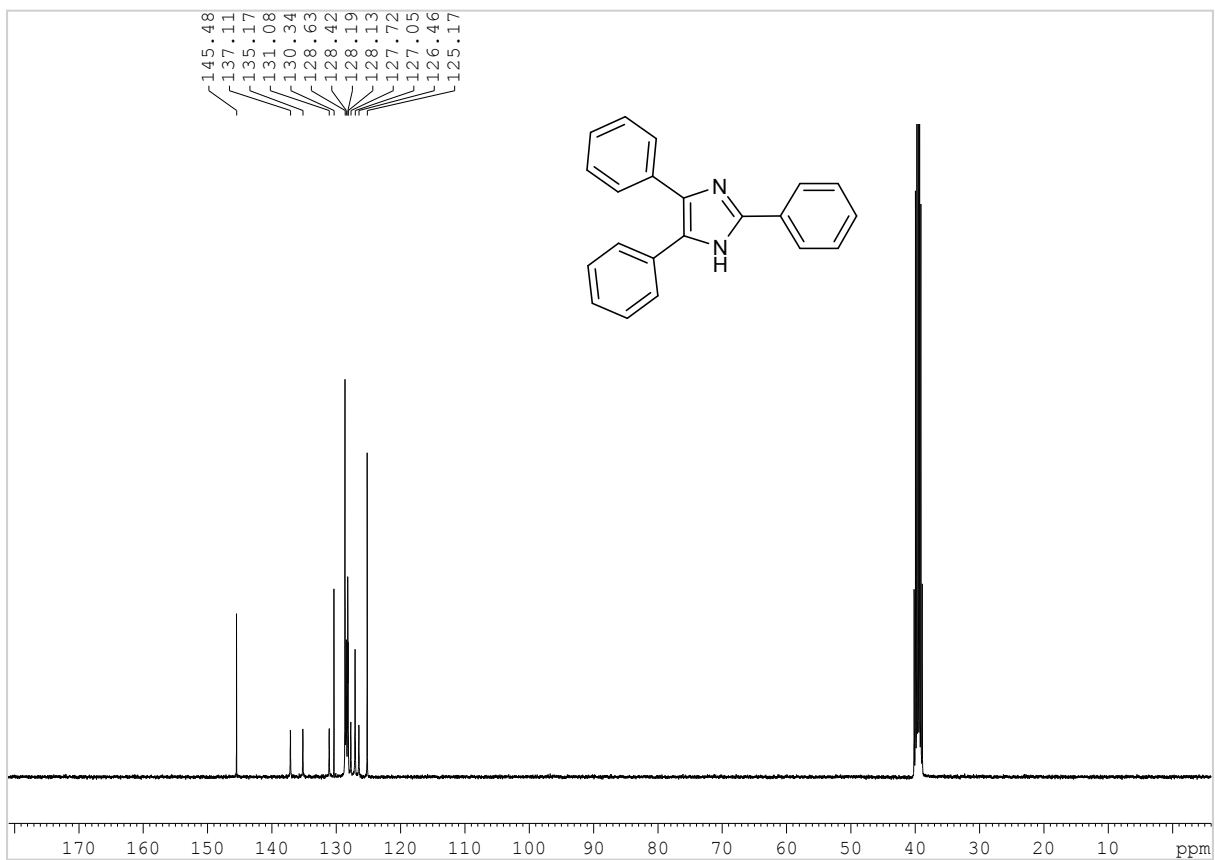

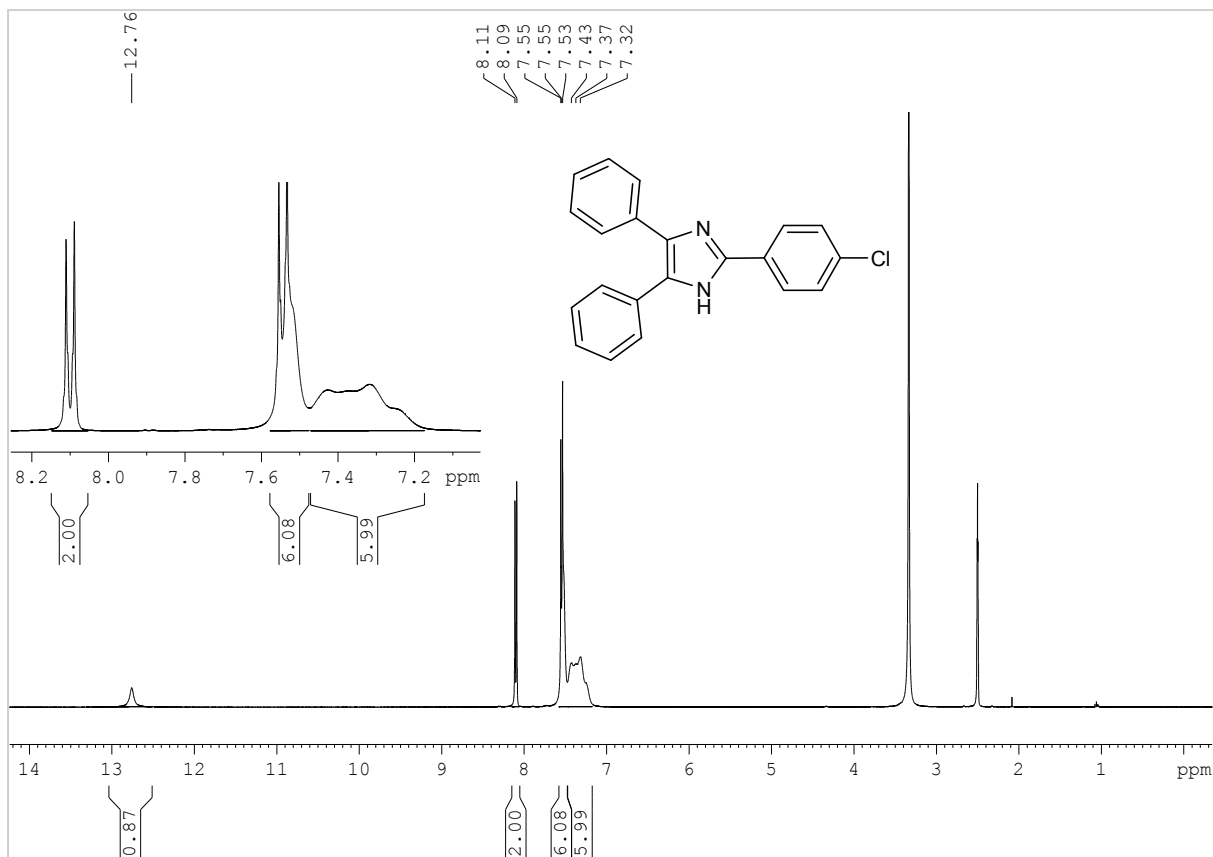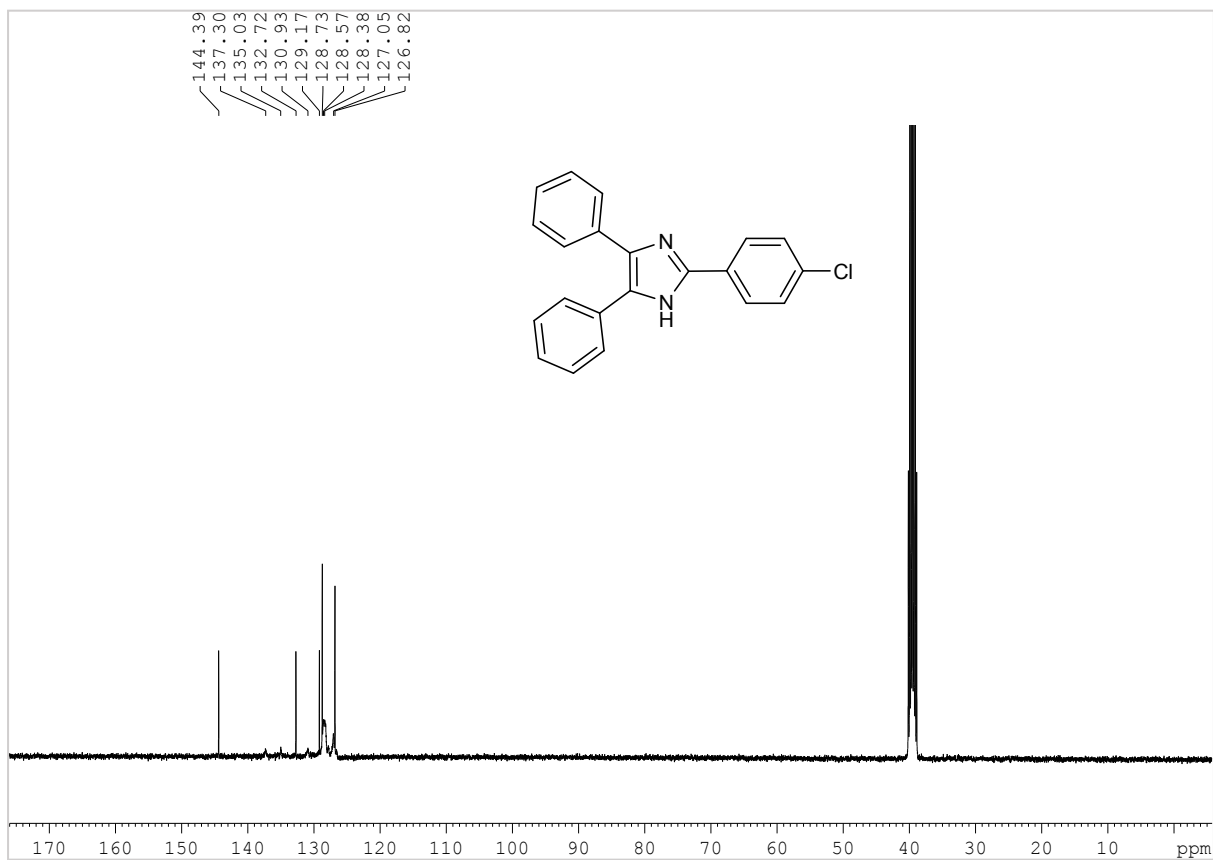

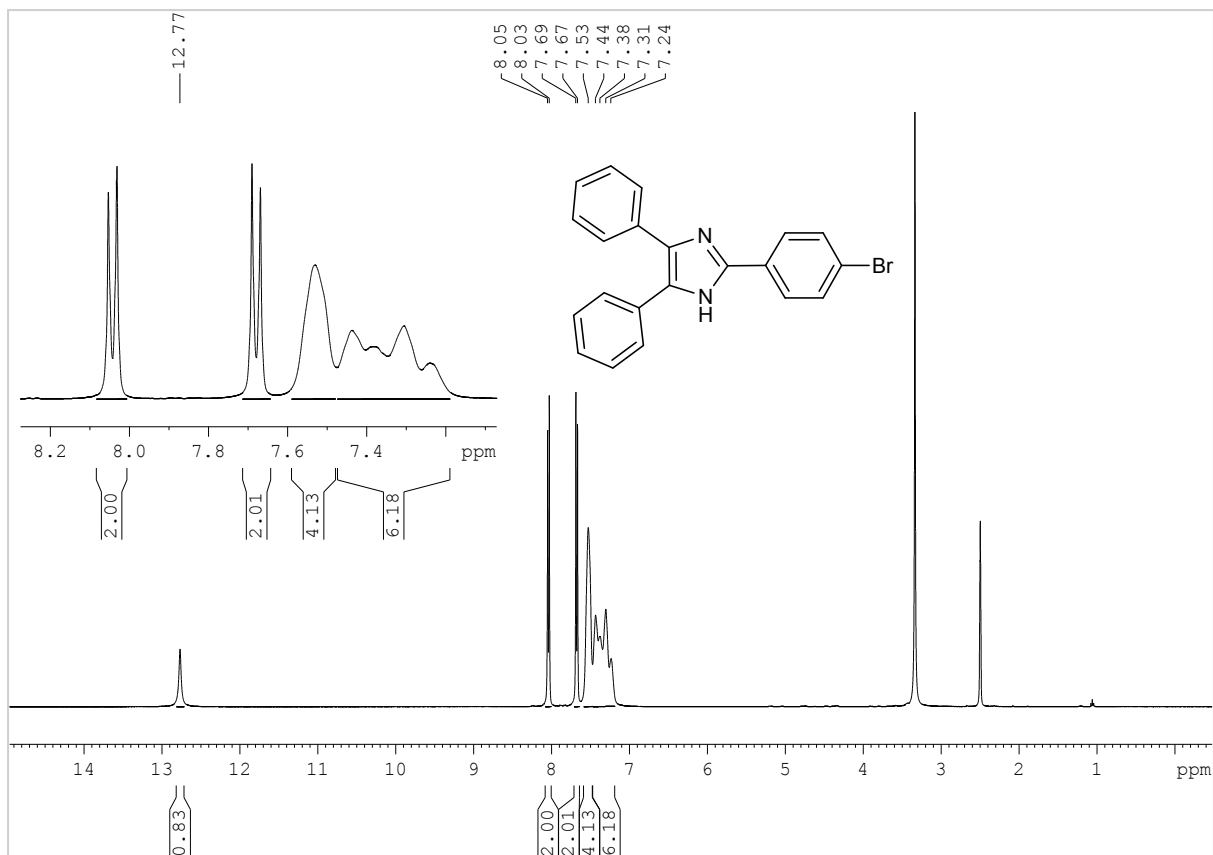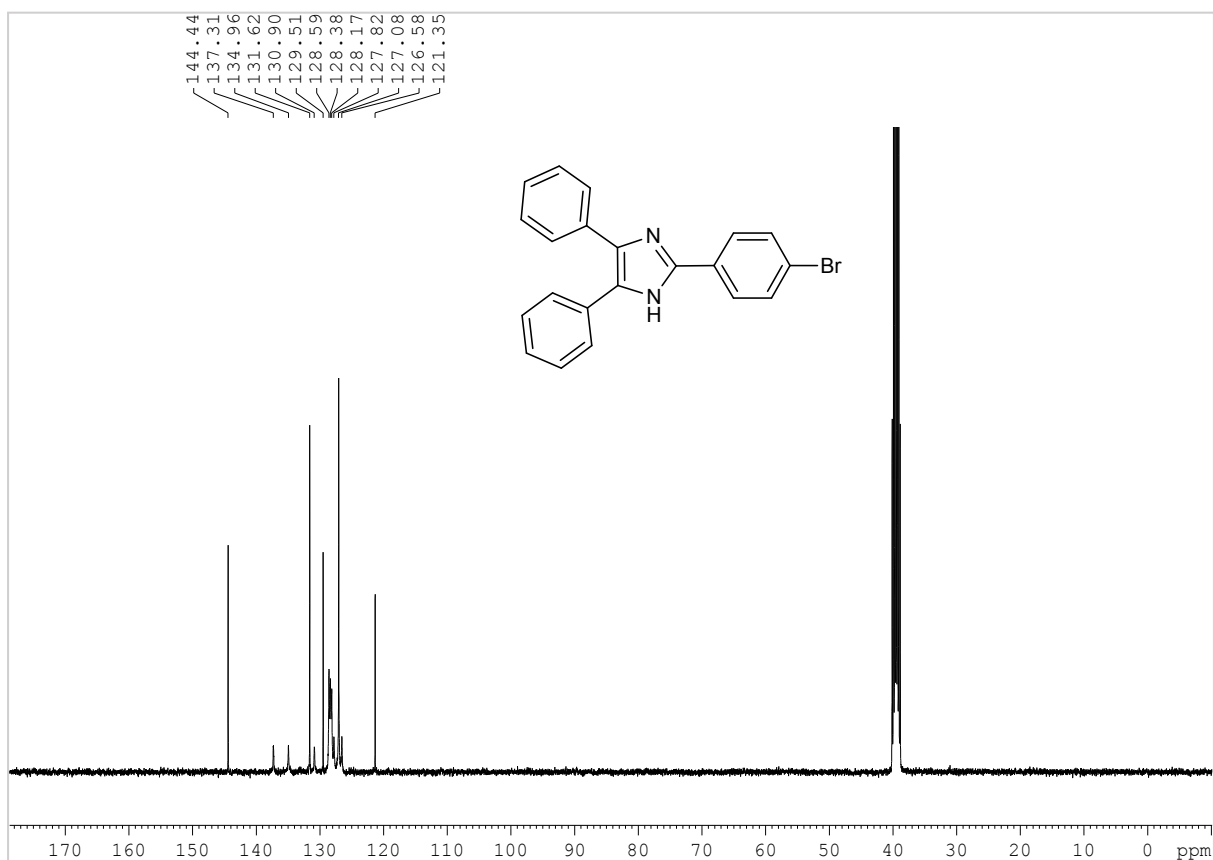

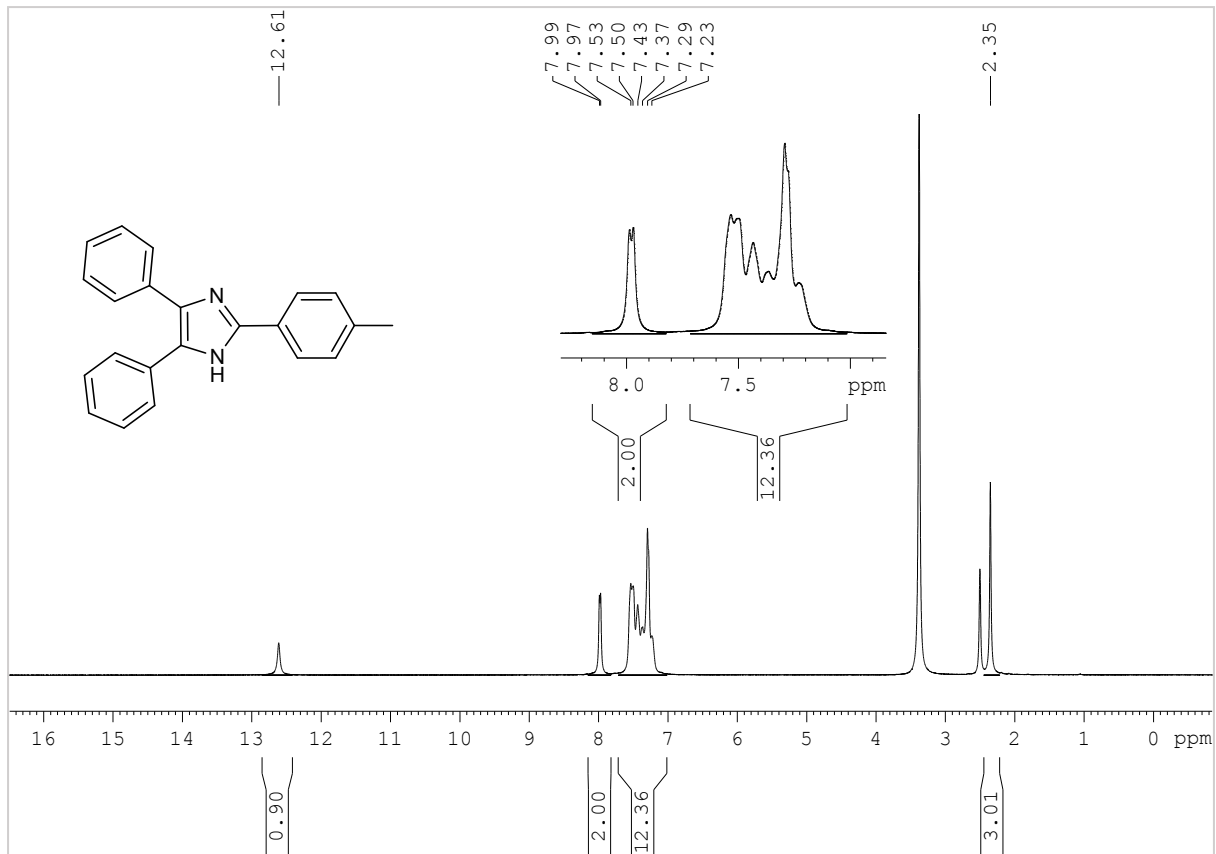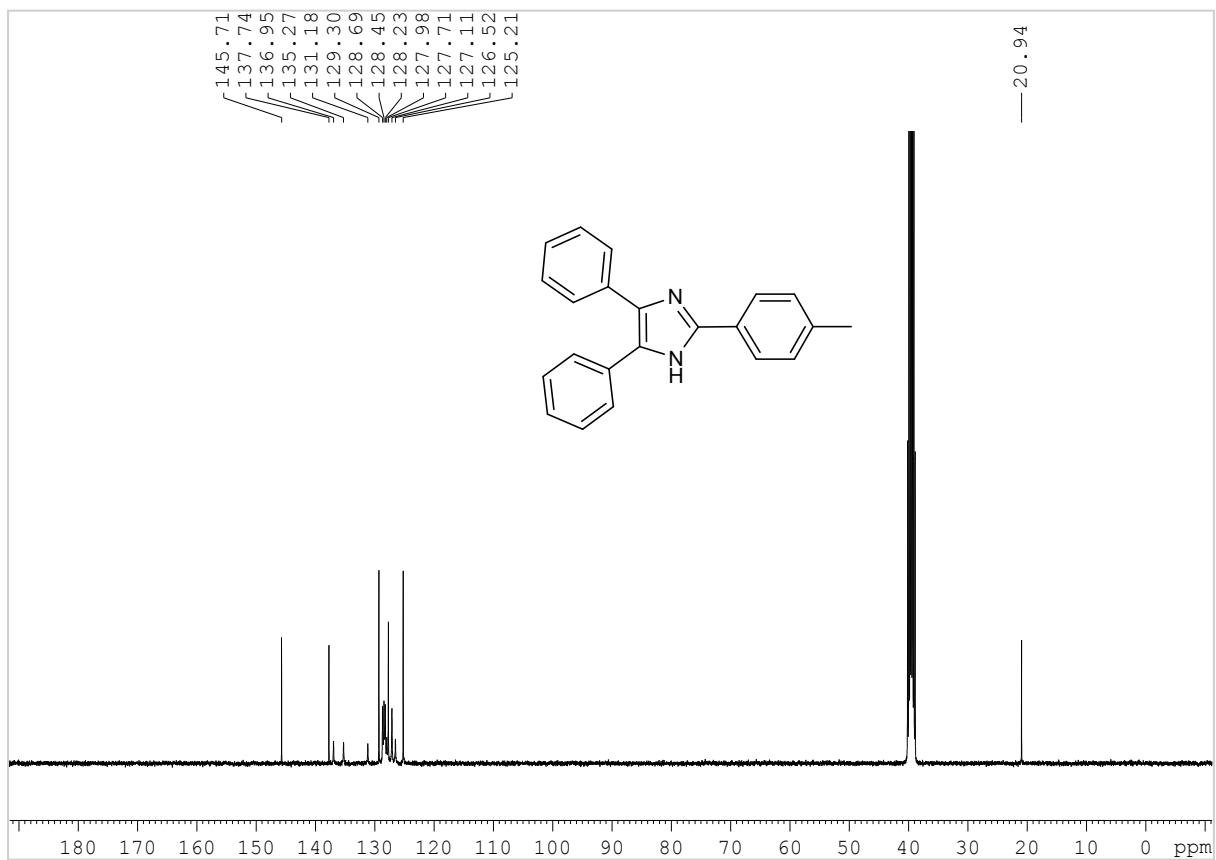



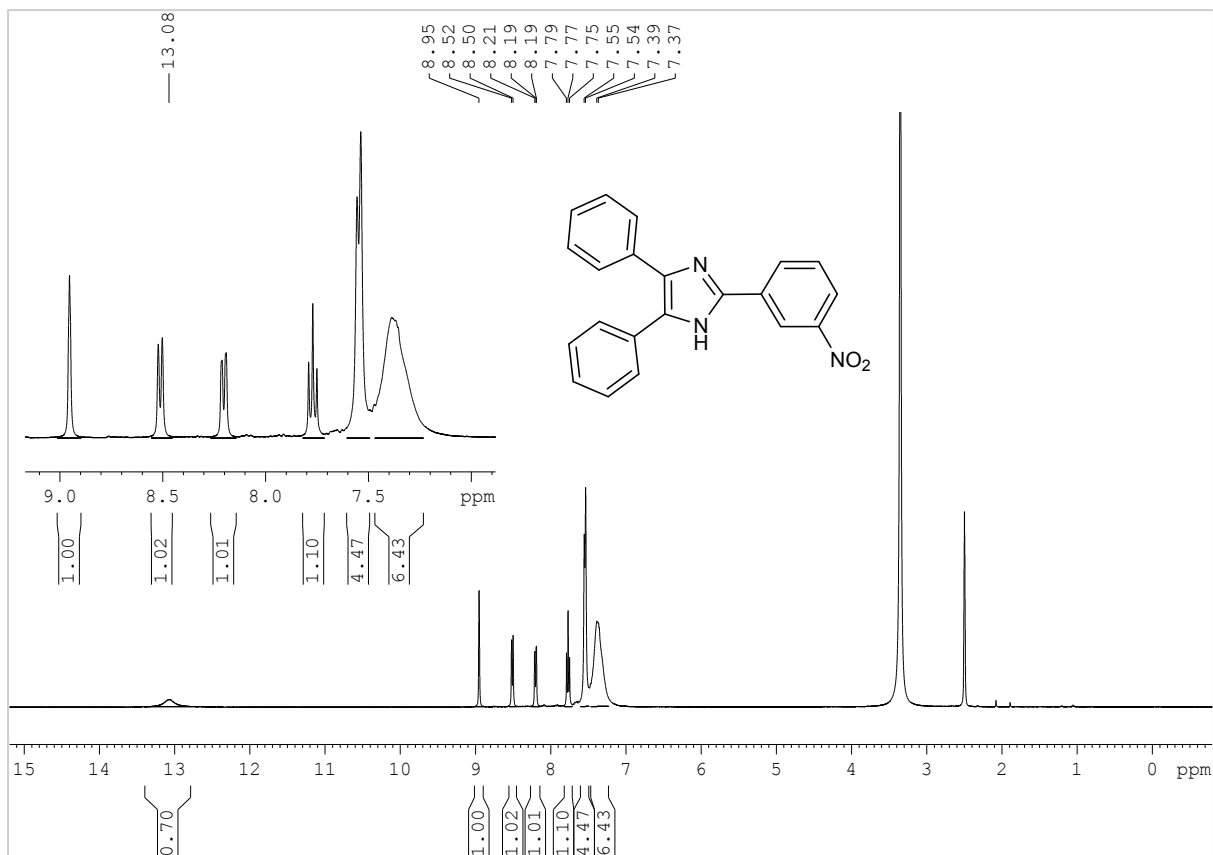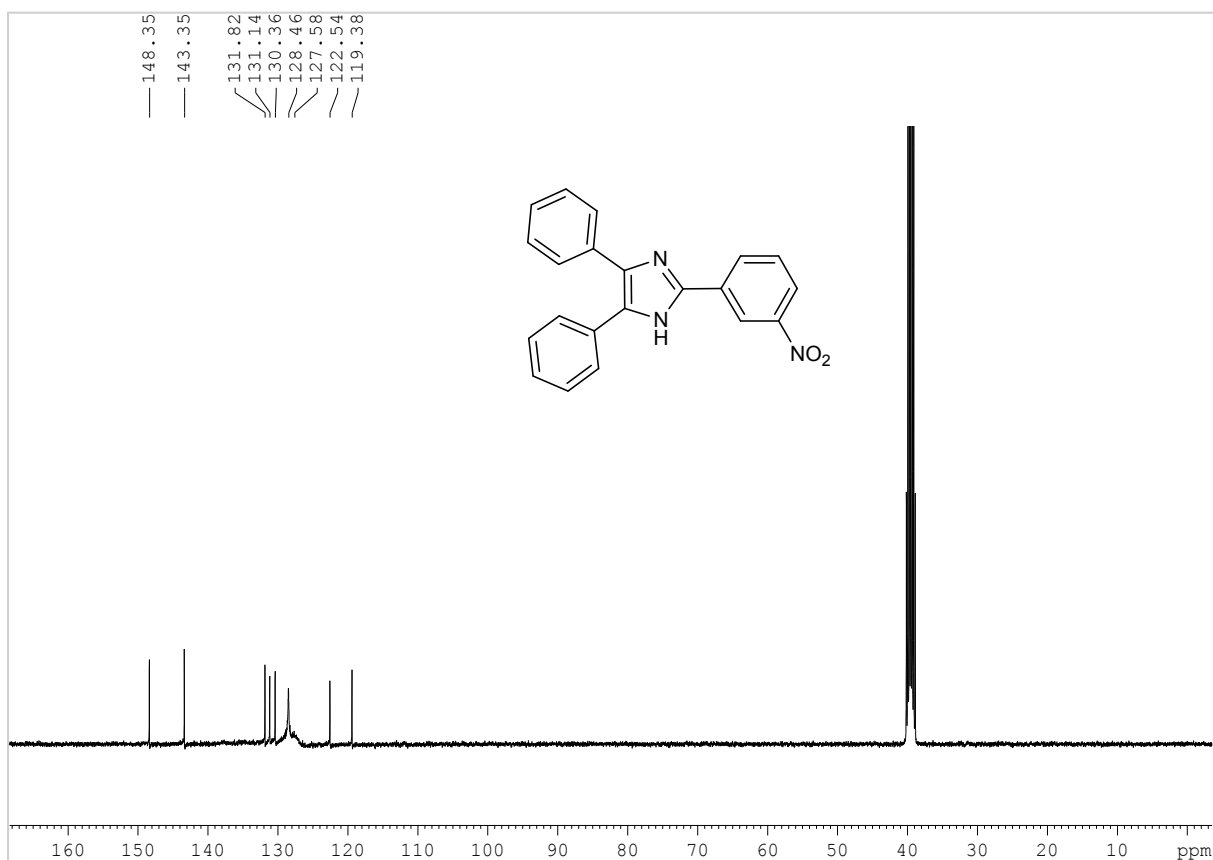

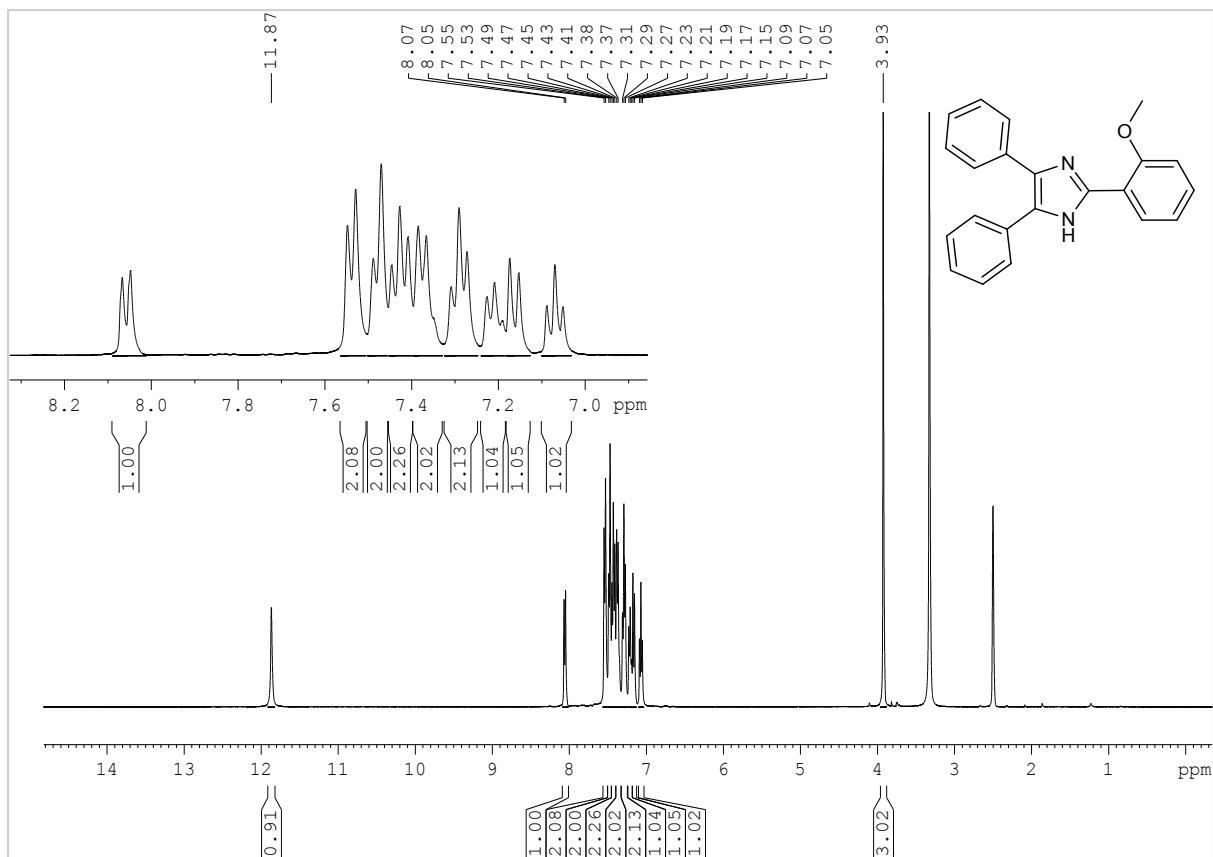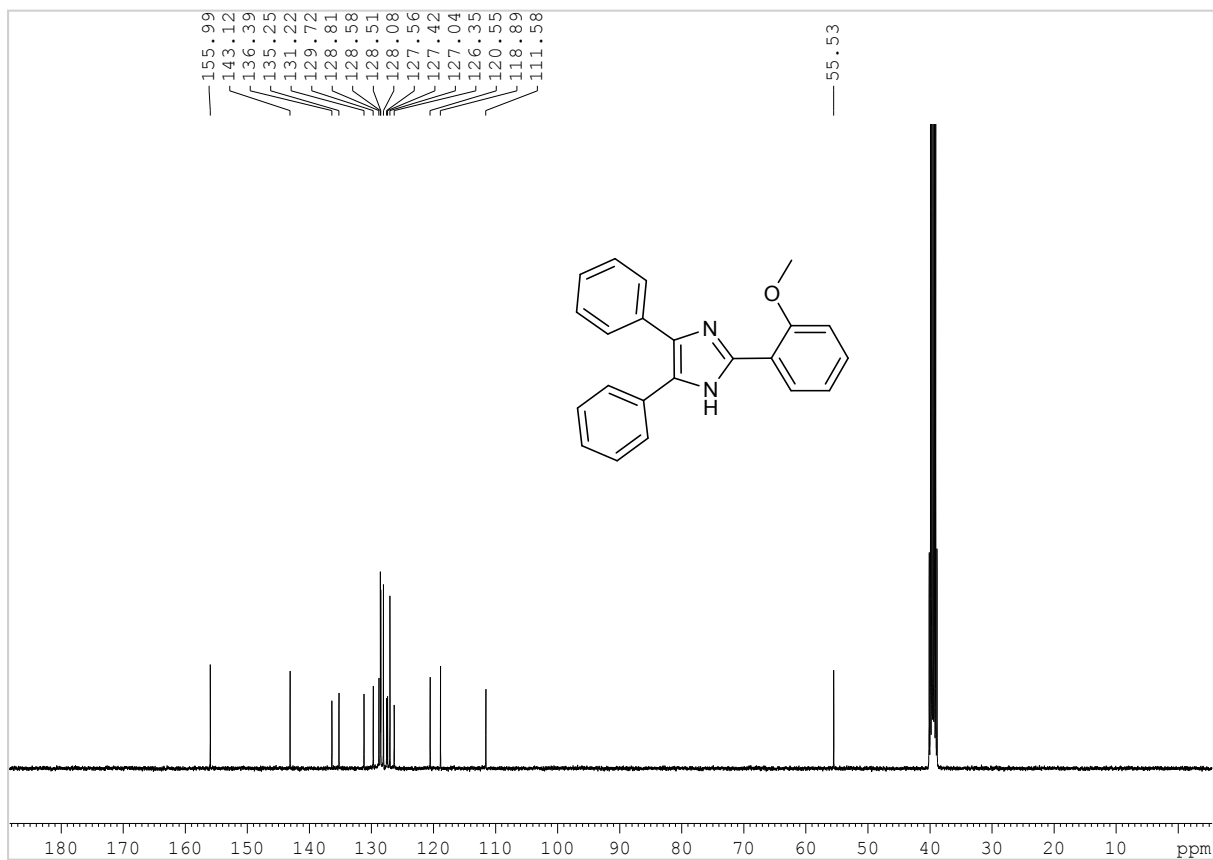

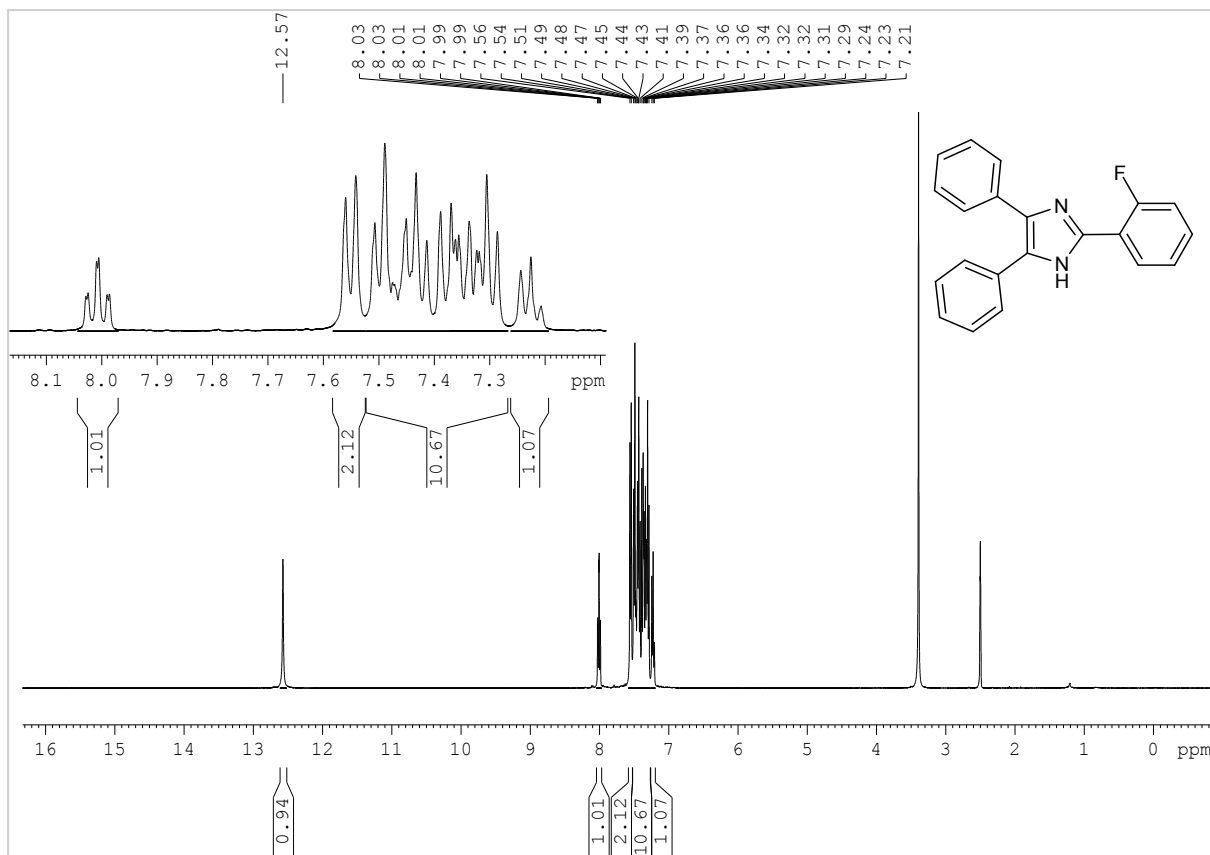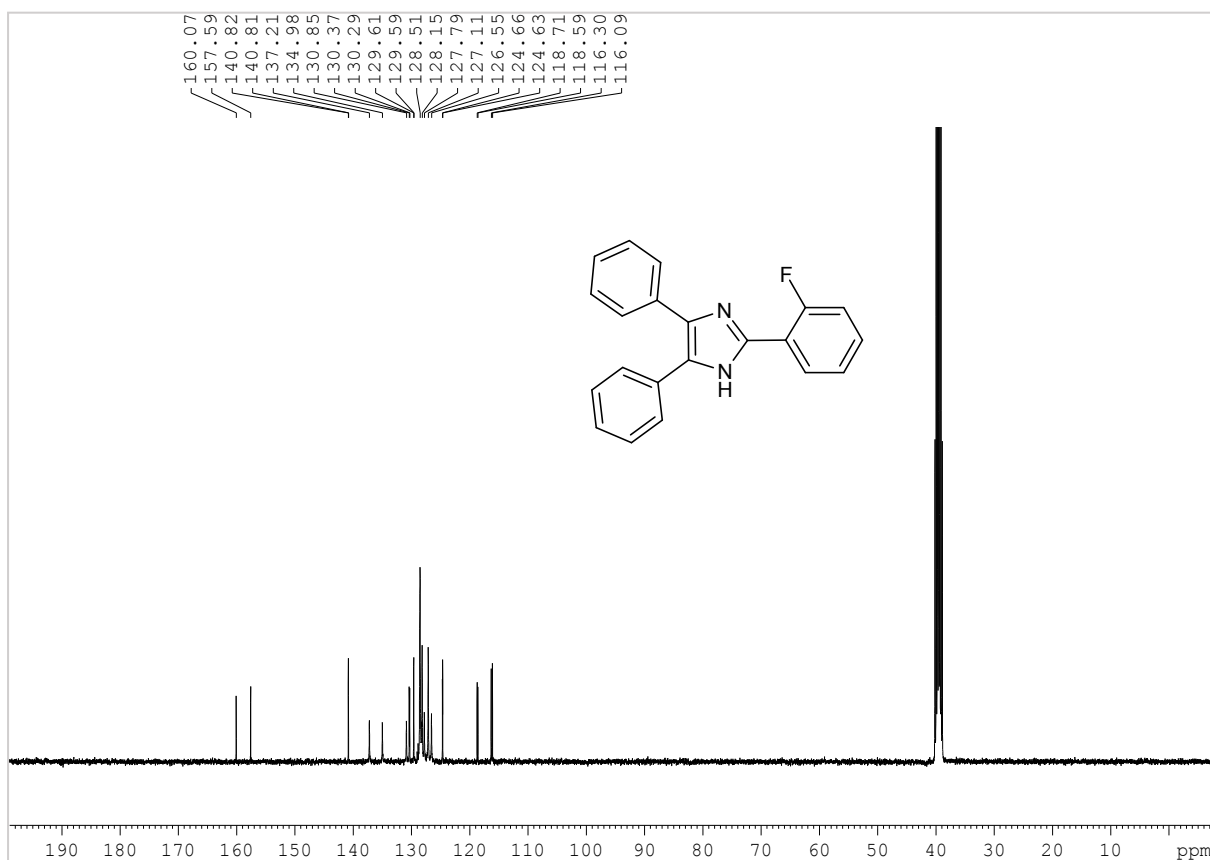

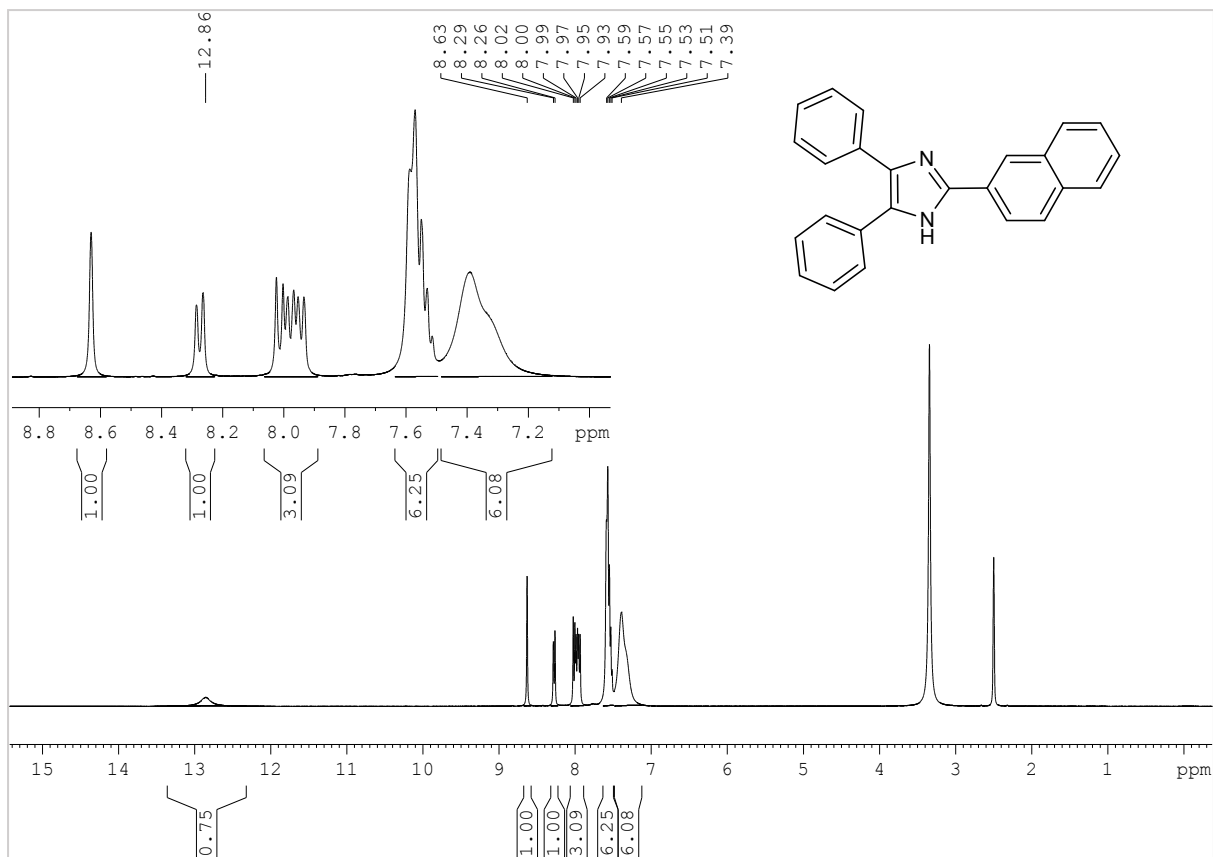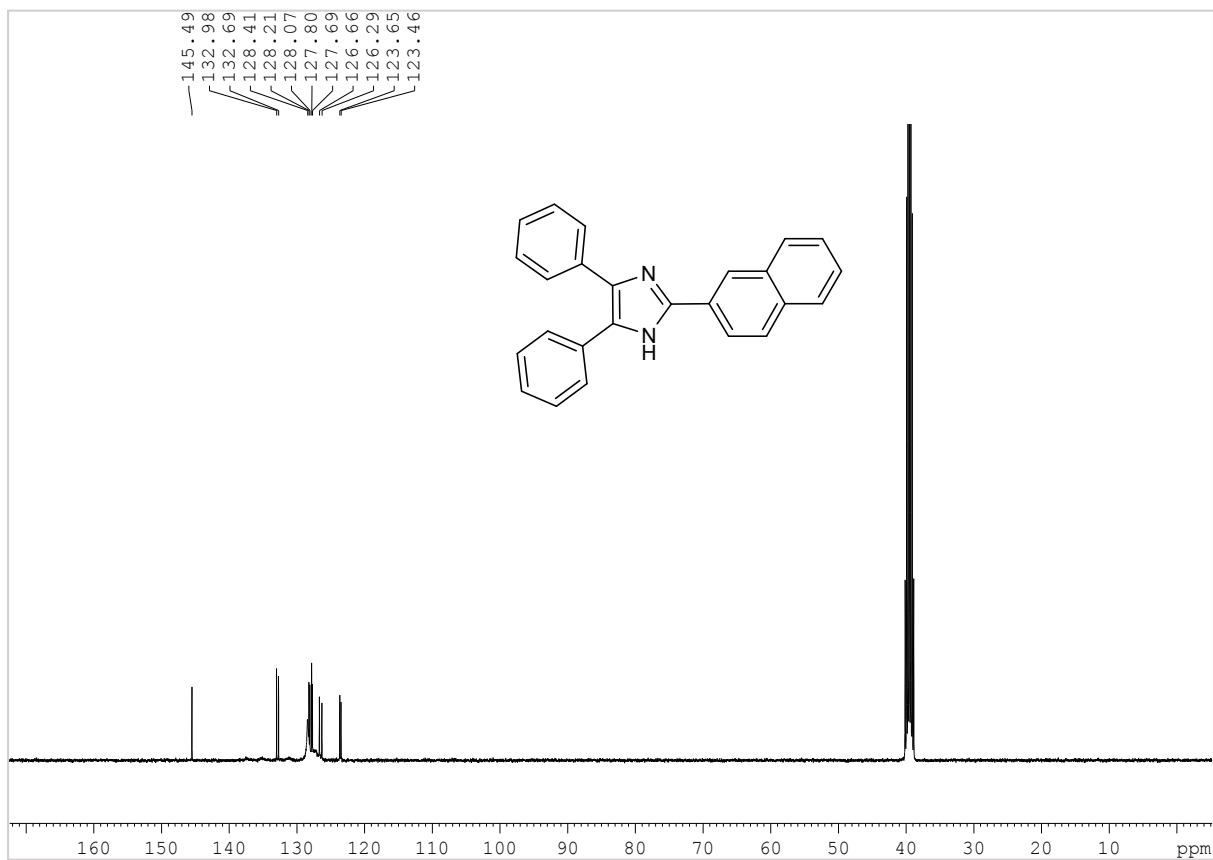

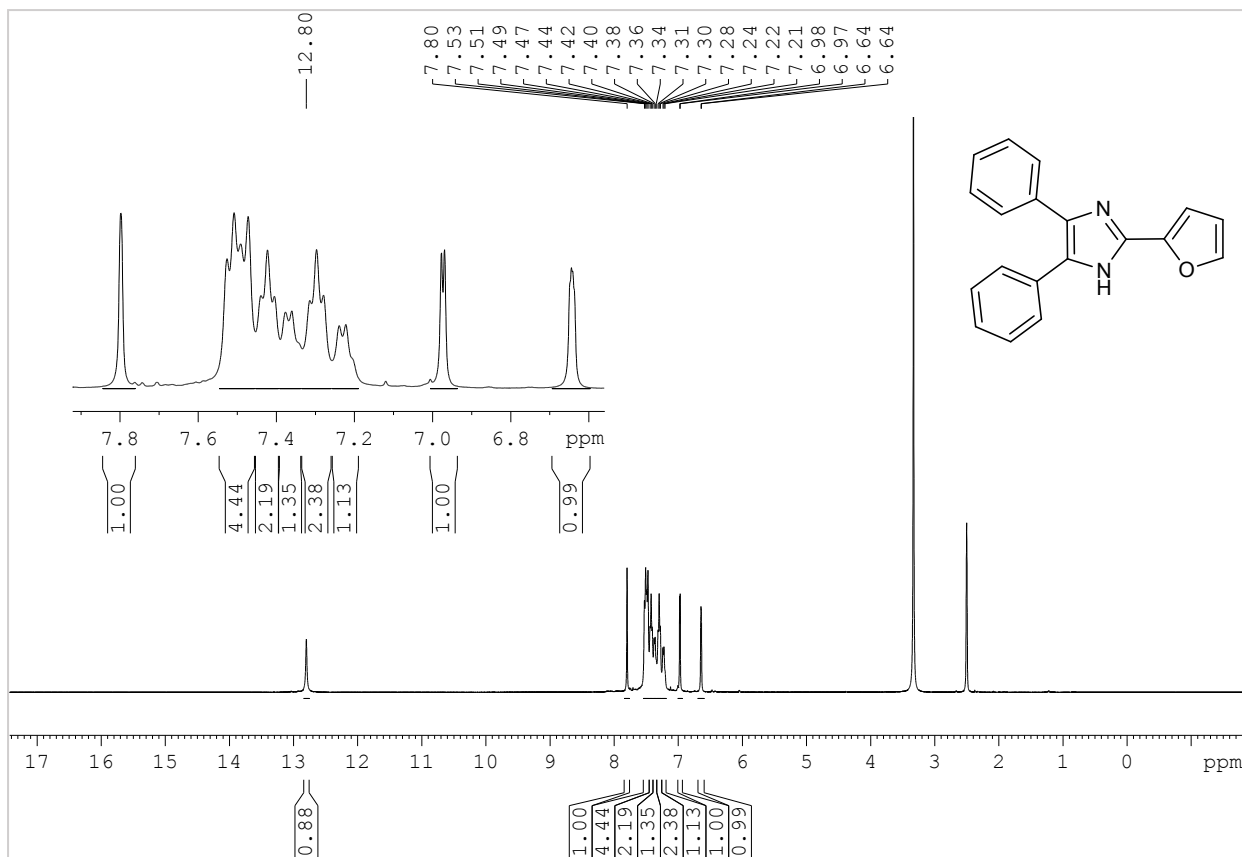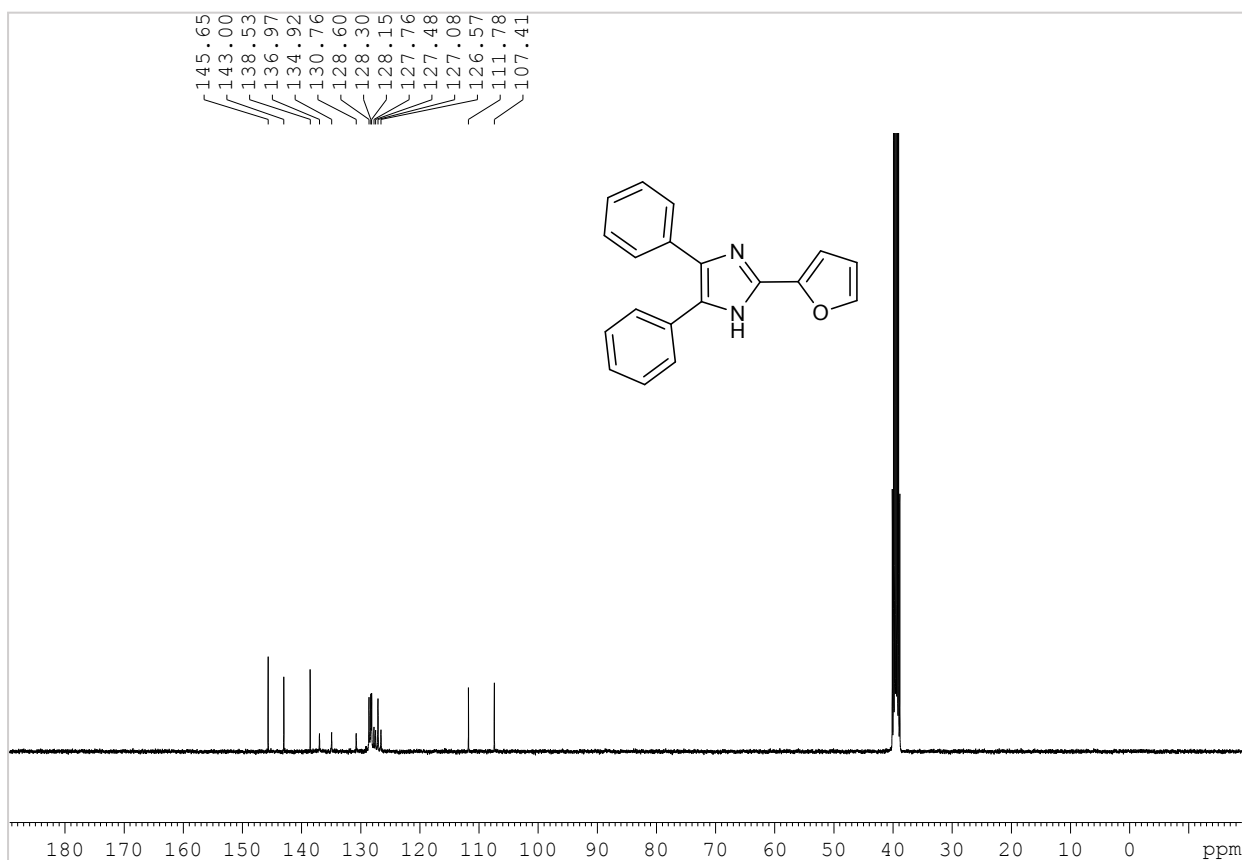

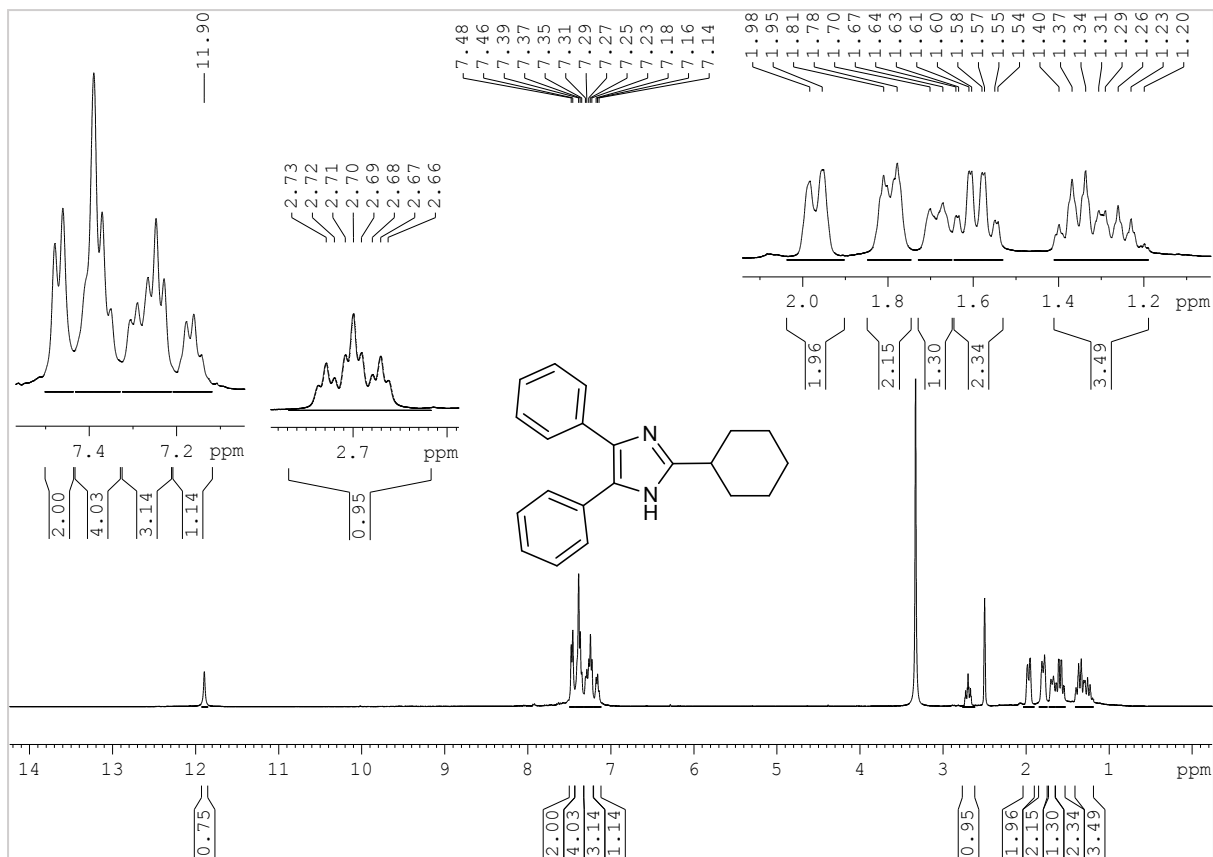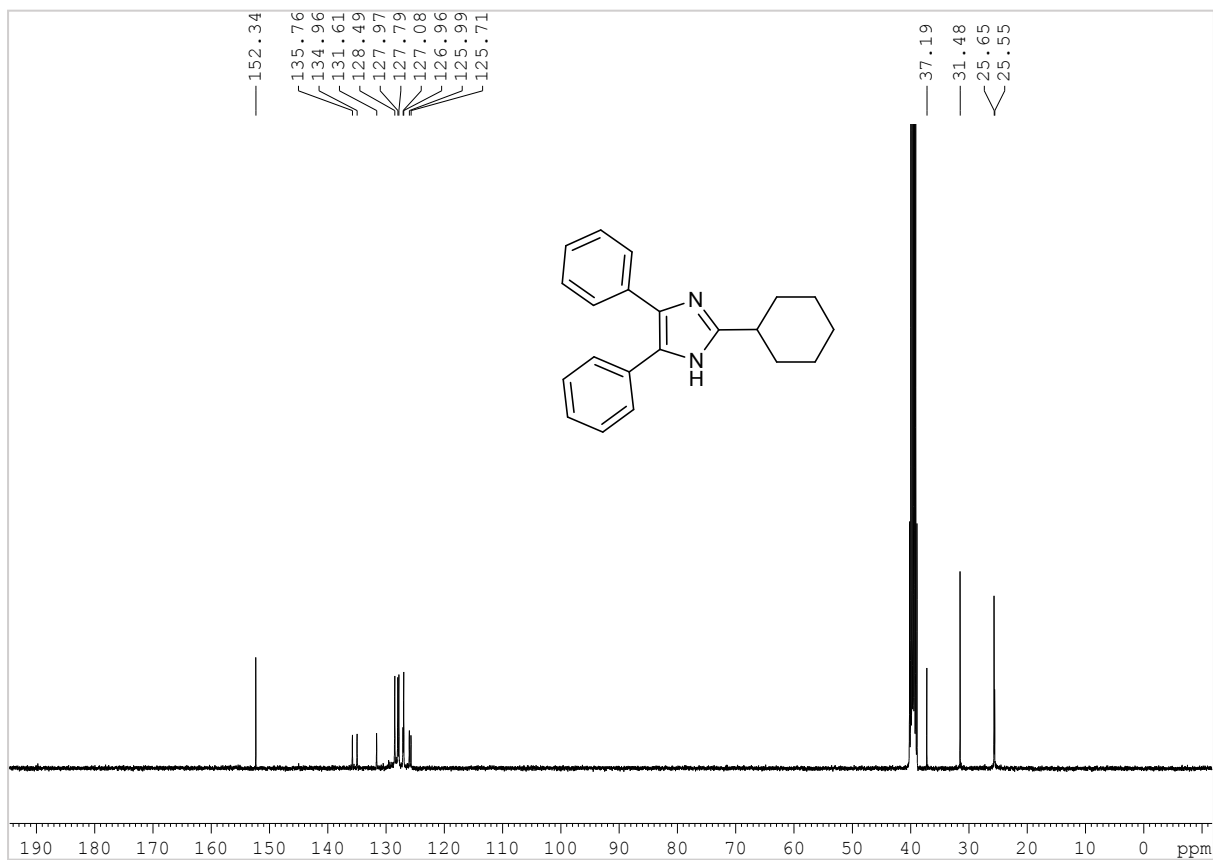

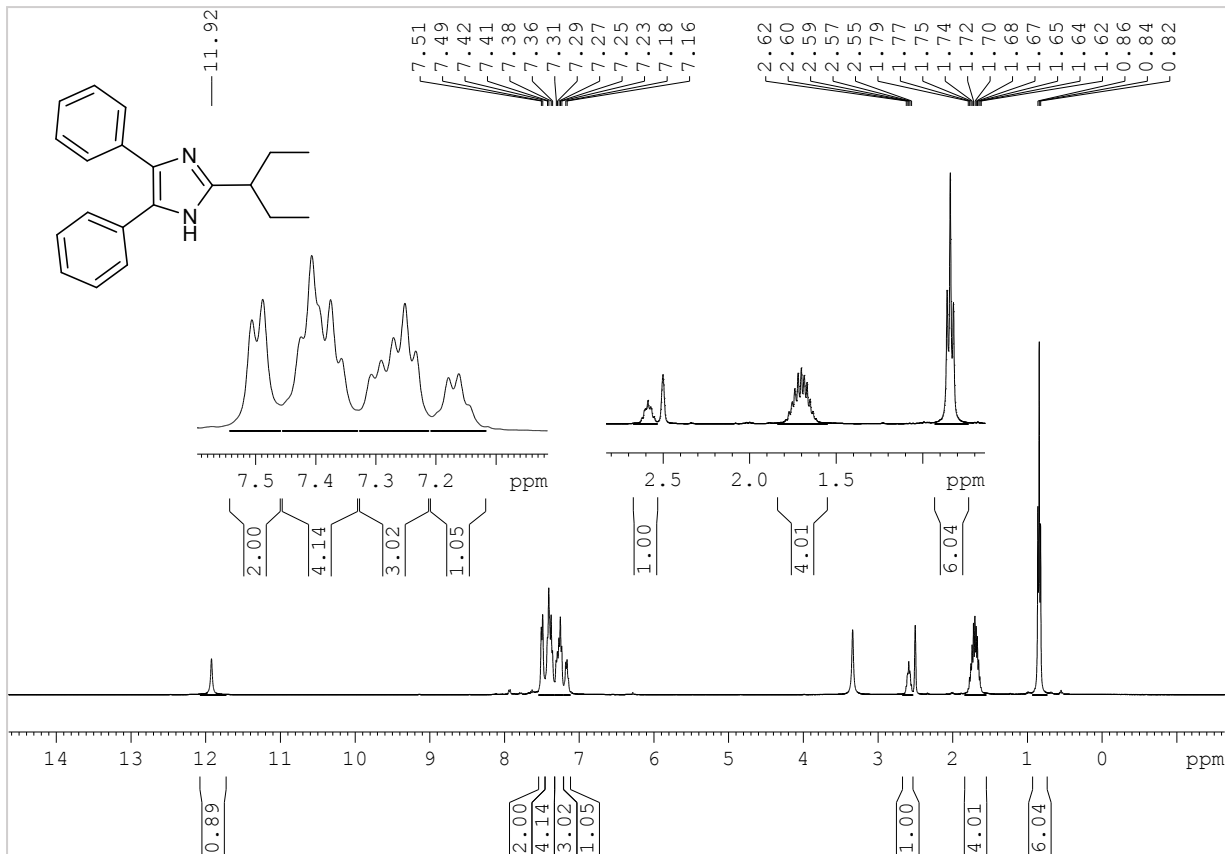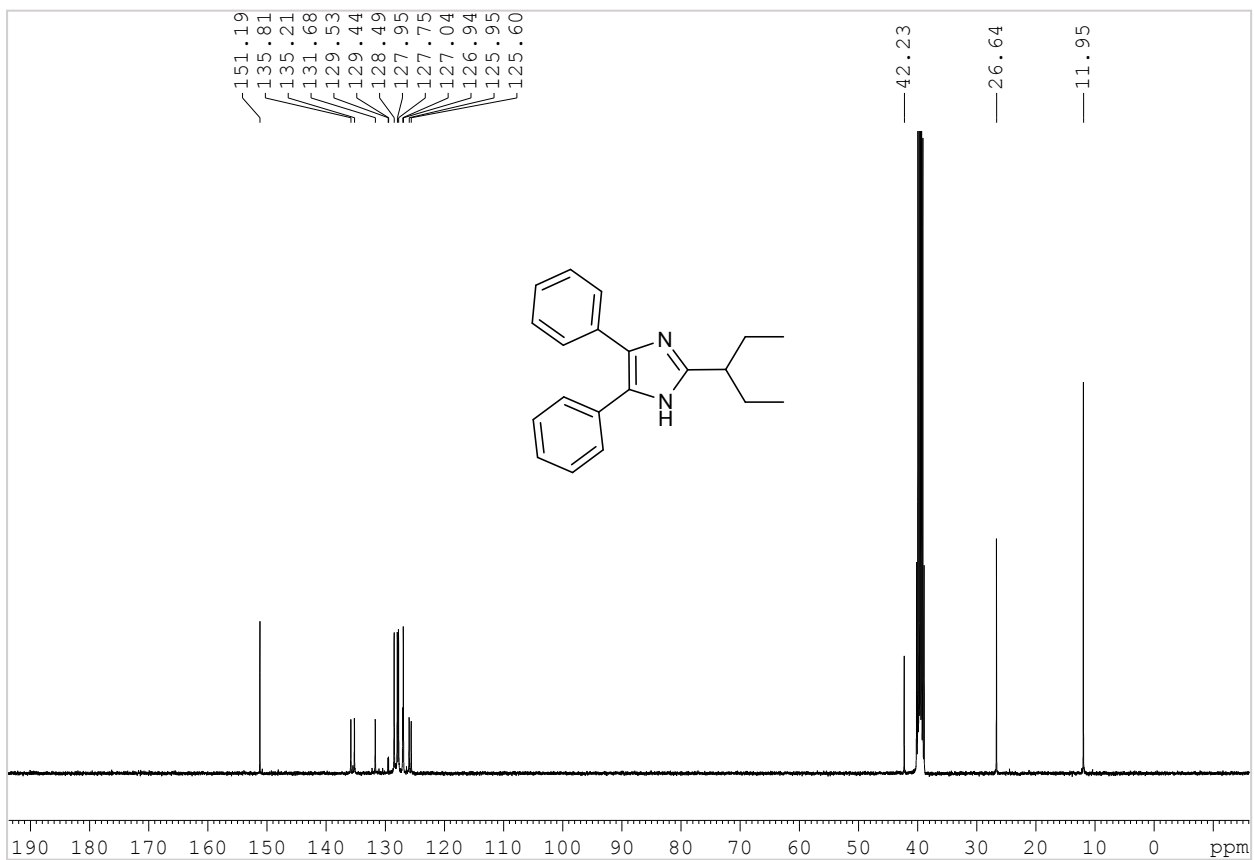

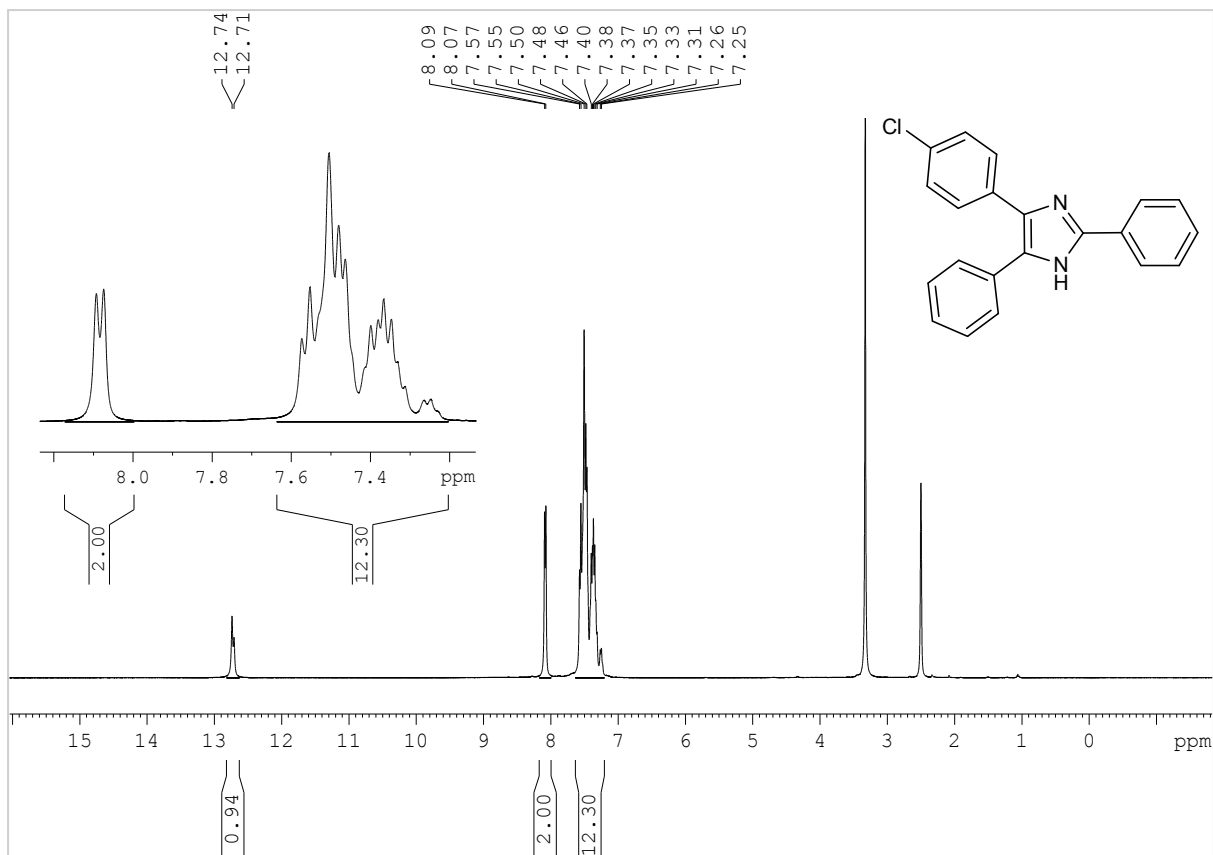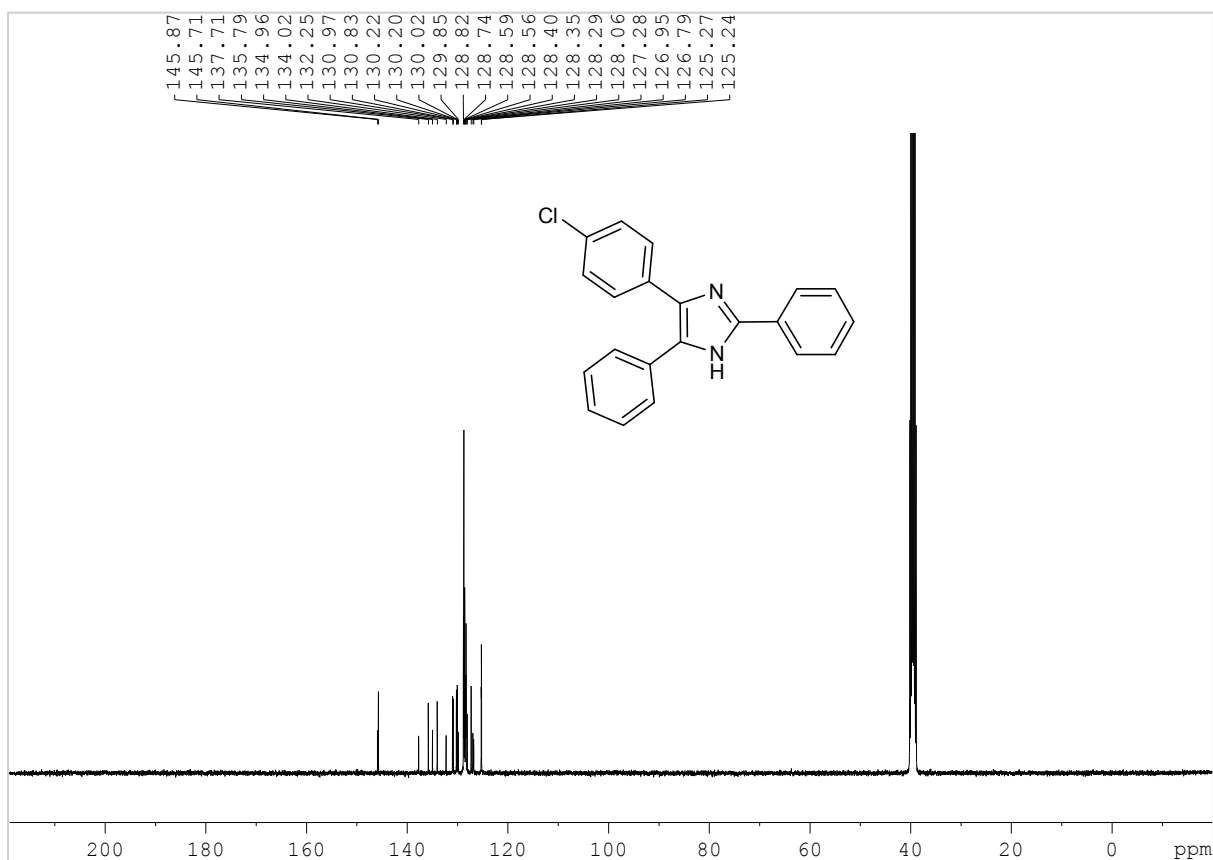



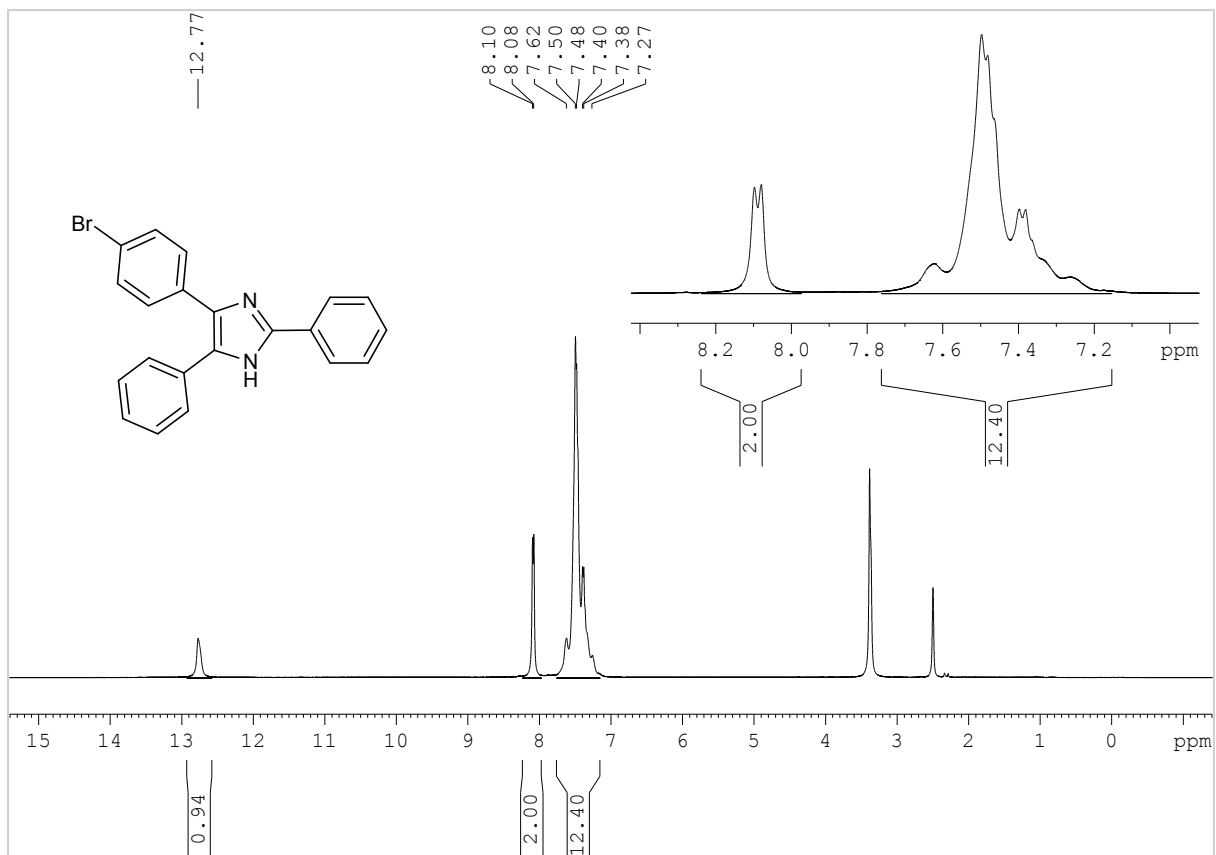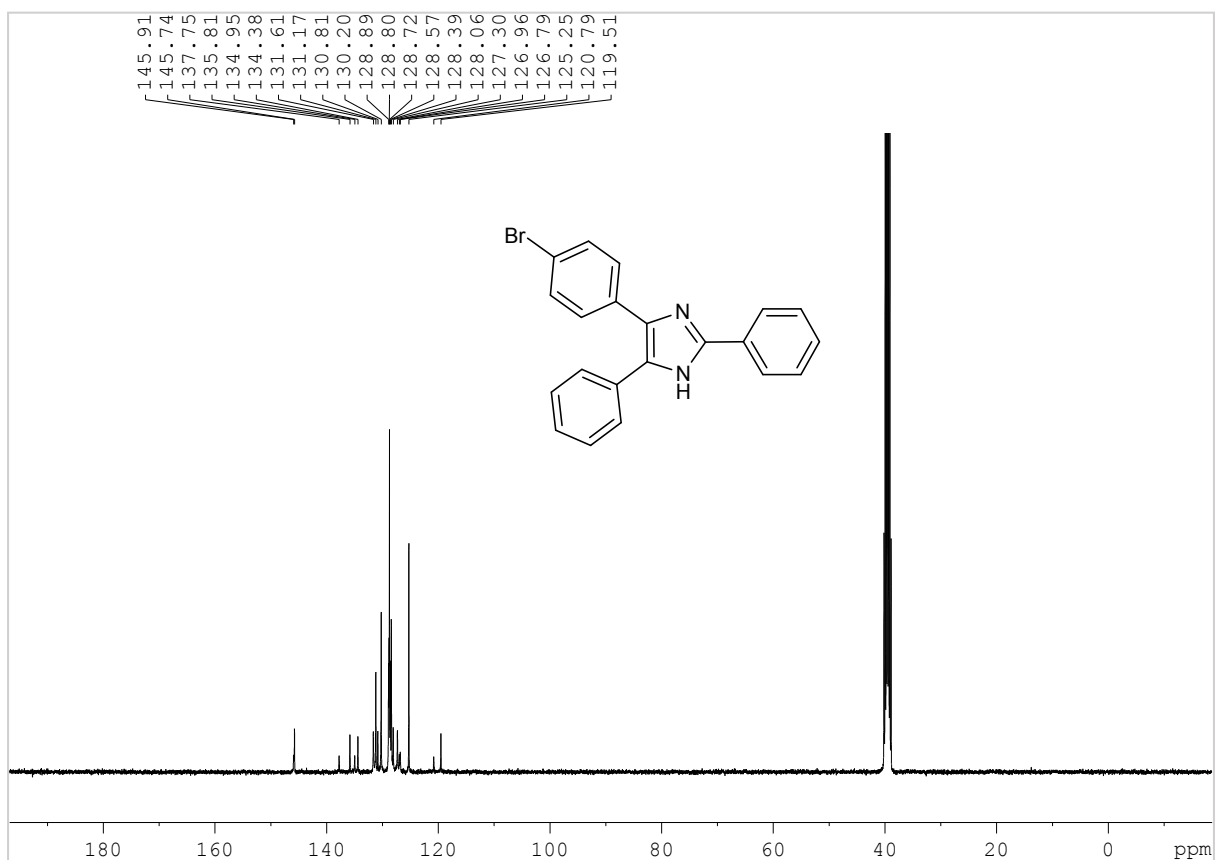

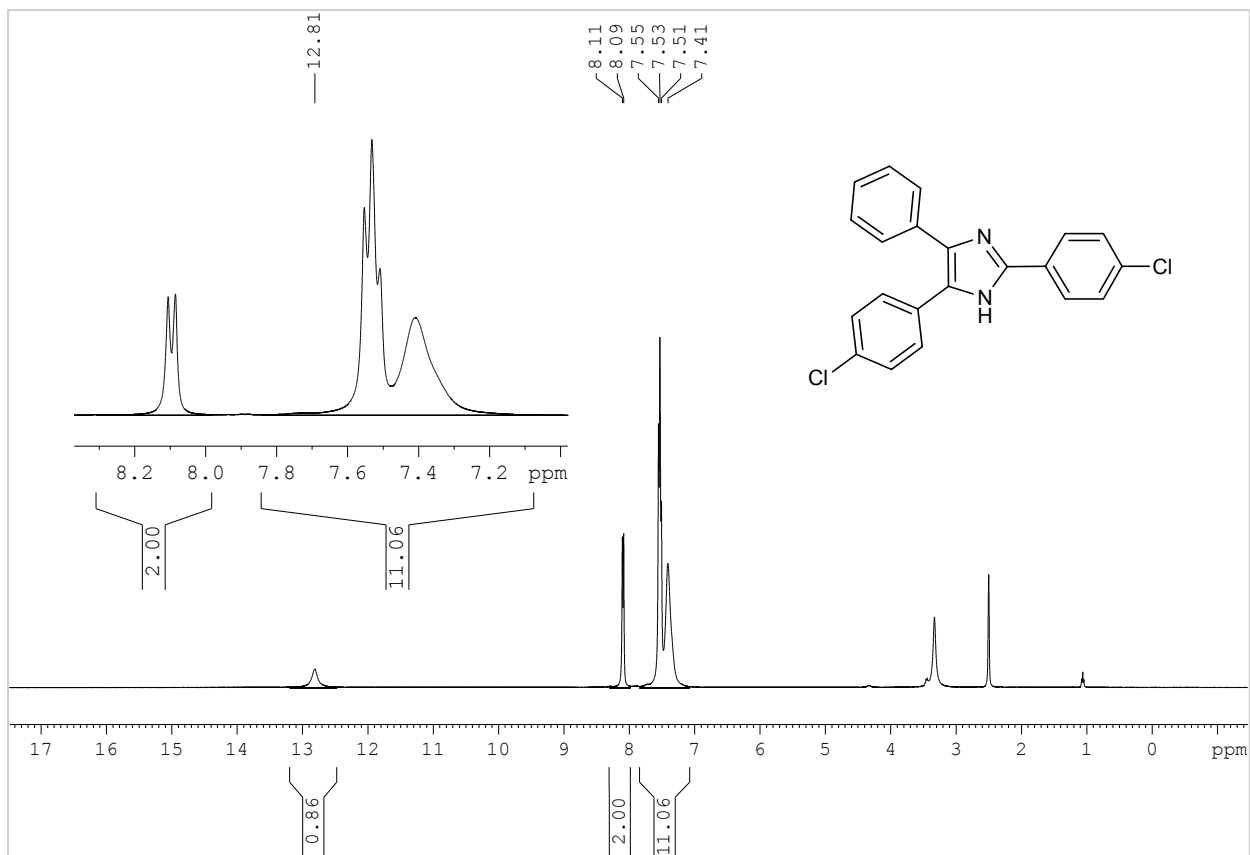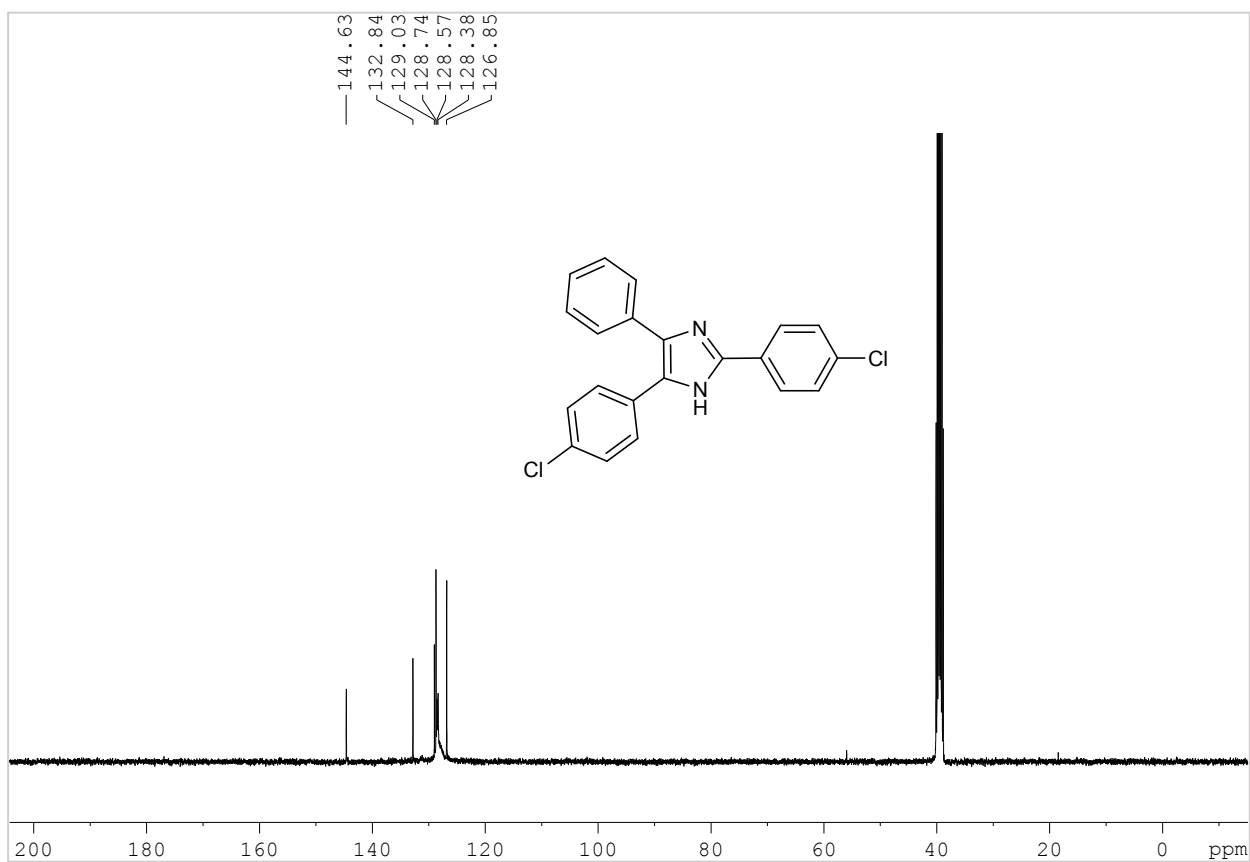

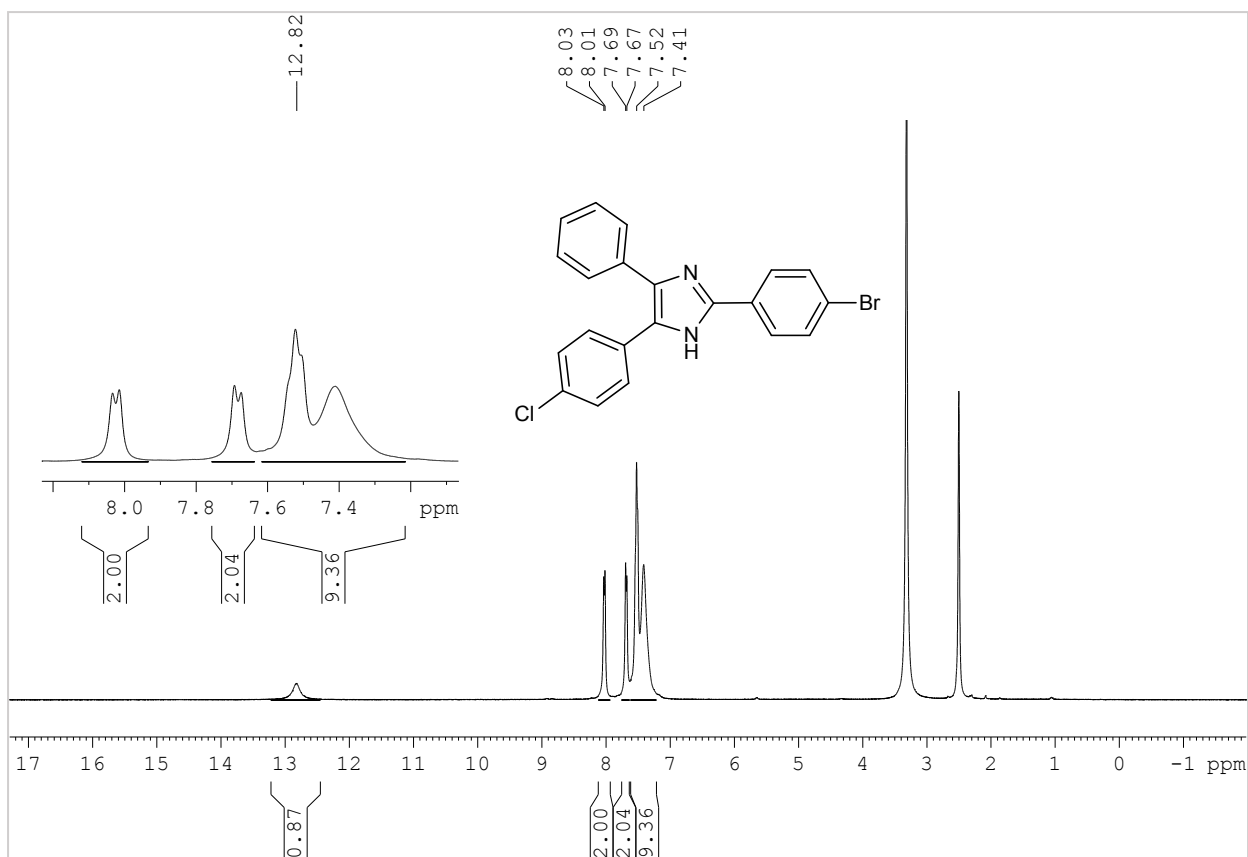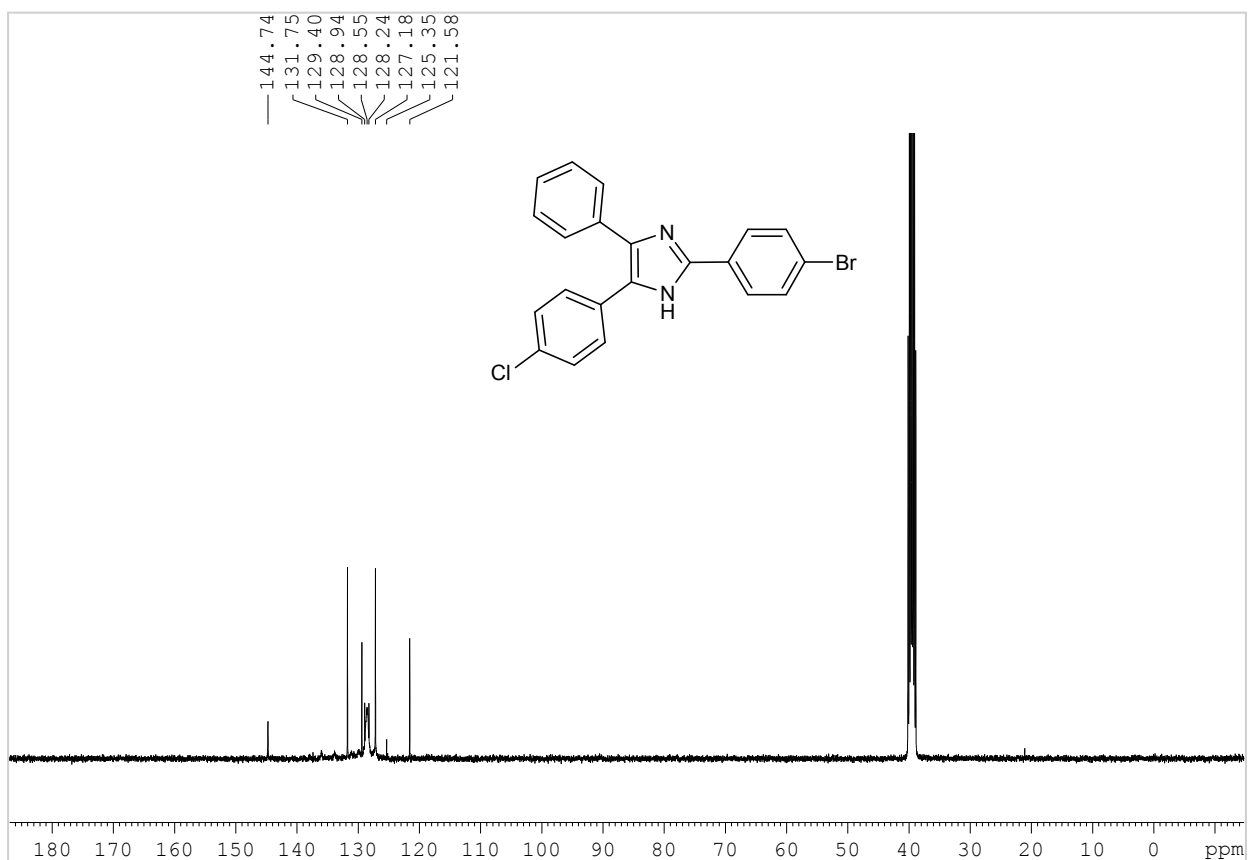

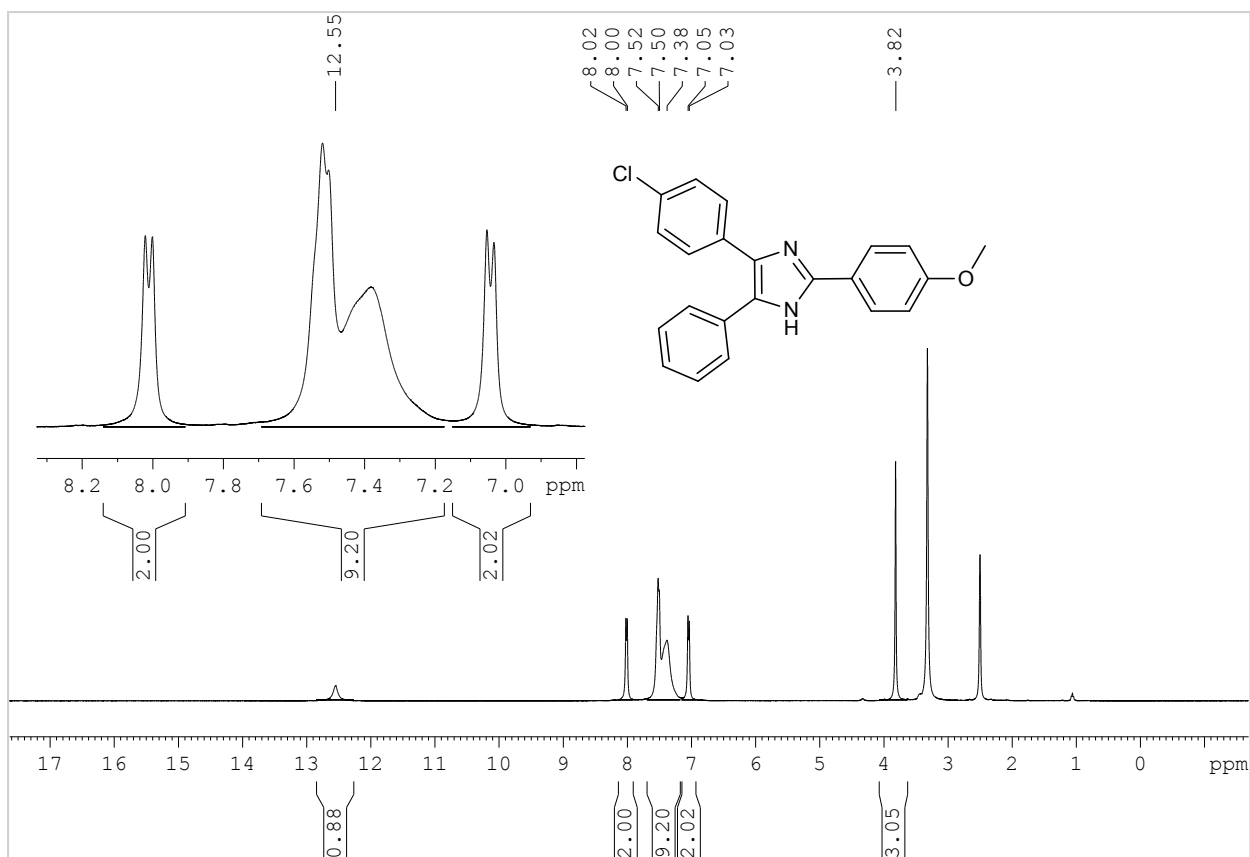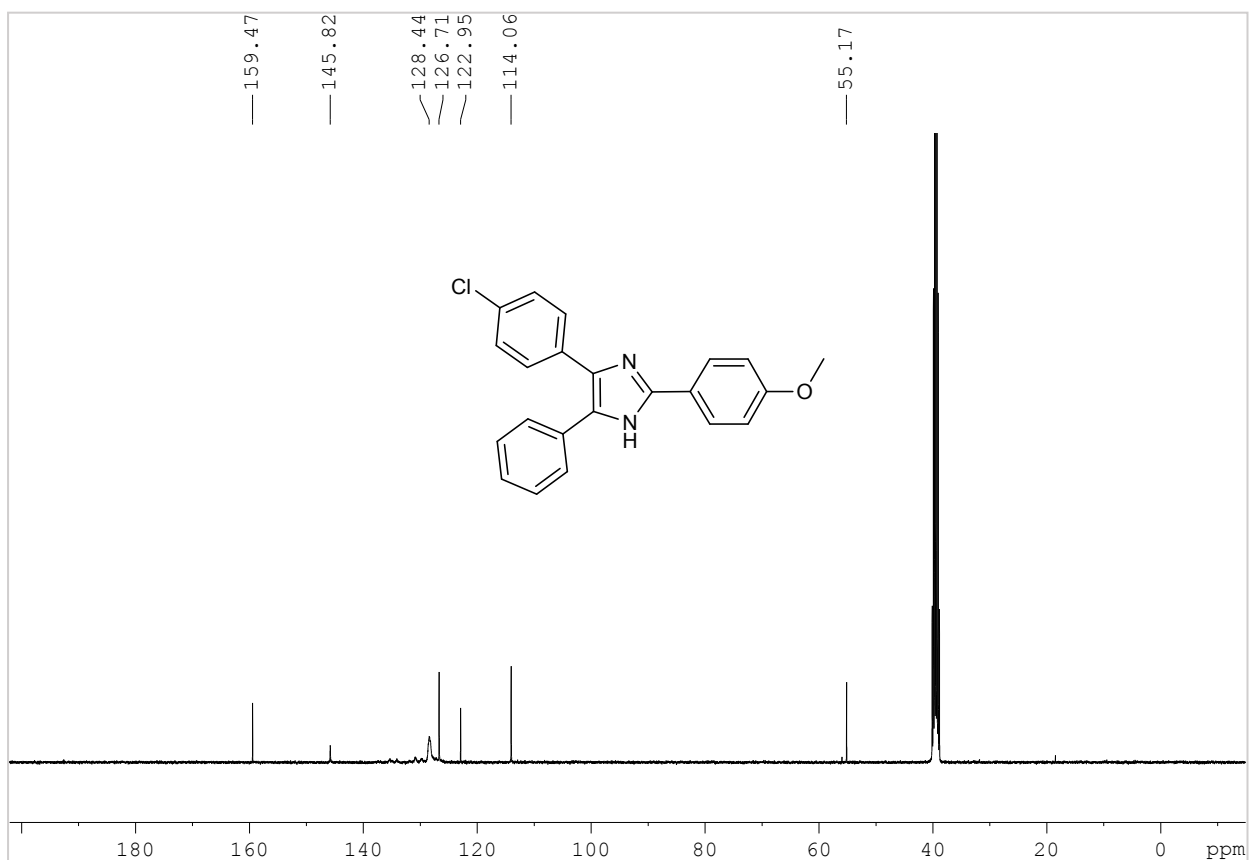

# Elemental Composition Report

## Page 1

### Single Mass Analysis

Tolerance = 5.0 PPM / DBE: min = -1.5, max = 100.0

Element prediction: Off

Number of isotope peaks used for i-FIT = 2

Monoisotopic Mass, Even Electron Ions

36 formula(e) evaluated with 1 results within limits (up to 20 best isotopic matches for each mass) Elements Used:

C: 20-25 H: 15-20 N: 0-5 O: 0-5 Cl: 0-1

Chloro-methoxy Imid 60 (1.005)

TOF MS ES+

9.76e+002

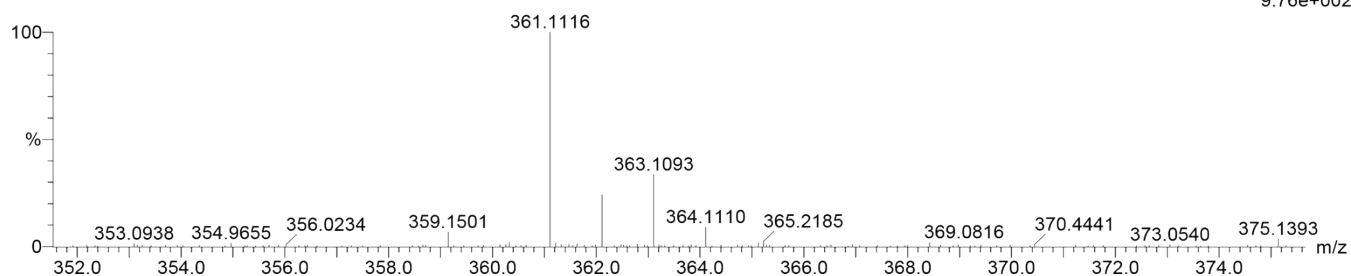

Minimum:

-1.5

Maximum:

5.0

5.0

100.0

| Mass | Calc. Mass | mDa | PPM | DBE | i-FIT | i-FIT (Norm) |
|------|------------|-----|-----|-----|-------|--------------|
|------|------------|-----|-----|-----|-------|--------------|

|          |          |     |     |      |      |     |                 |
|----------|----------|-----|-----|------|------|-----|-----------------|
| 361.1116 | 361.1108 | 0.8 | 2.2 | 14.5 | 58.1 | 0.0 | C22 H18 N2 O Cl |
|----------|----------|-----|-----|------|------|-----|-----------------|

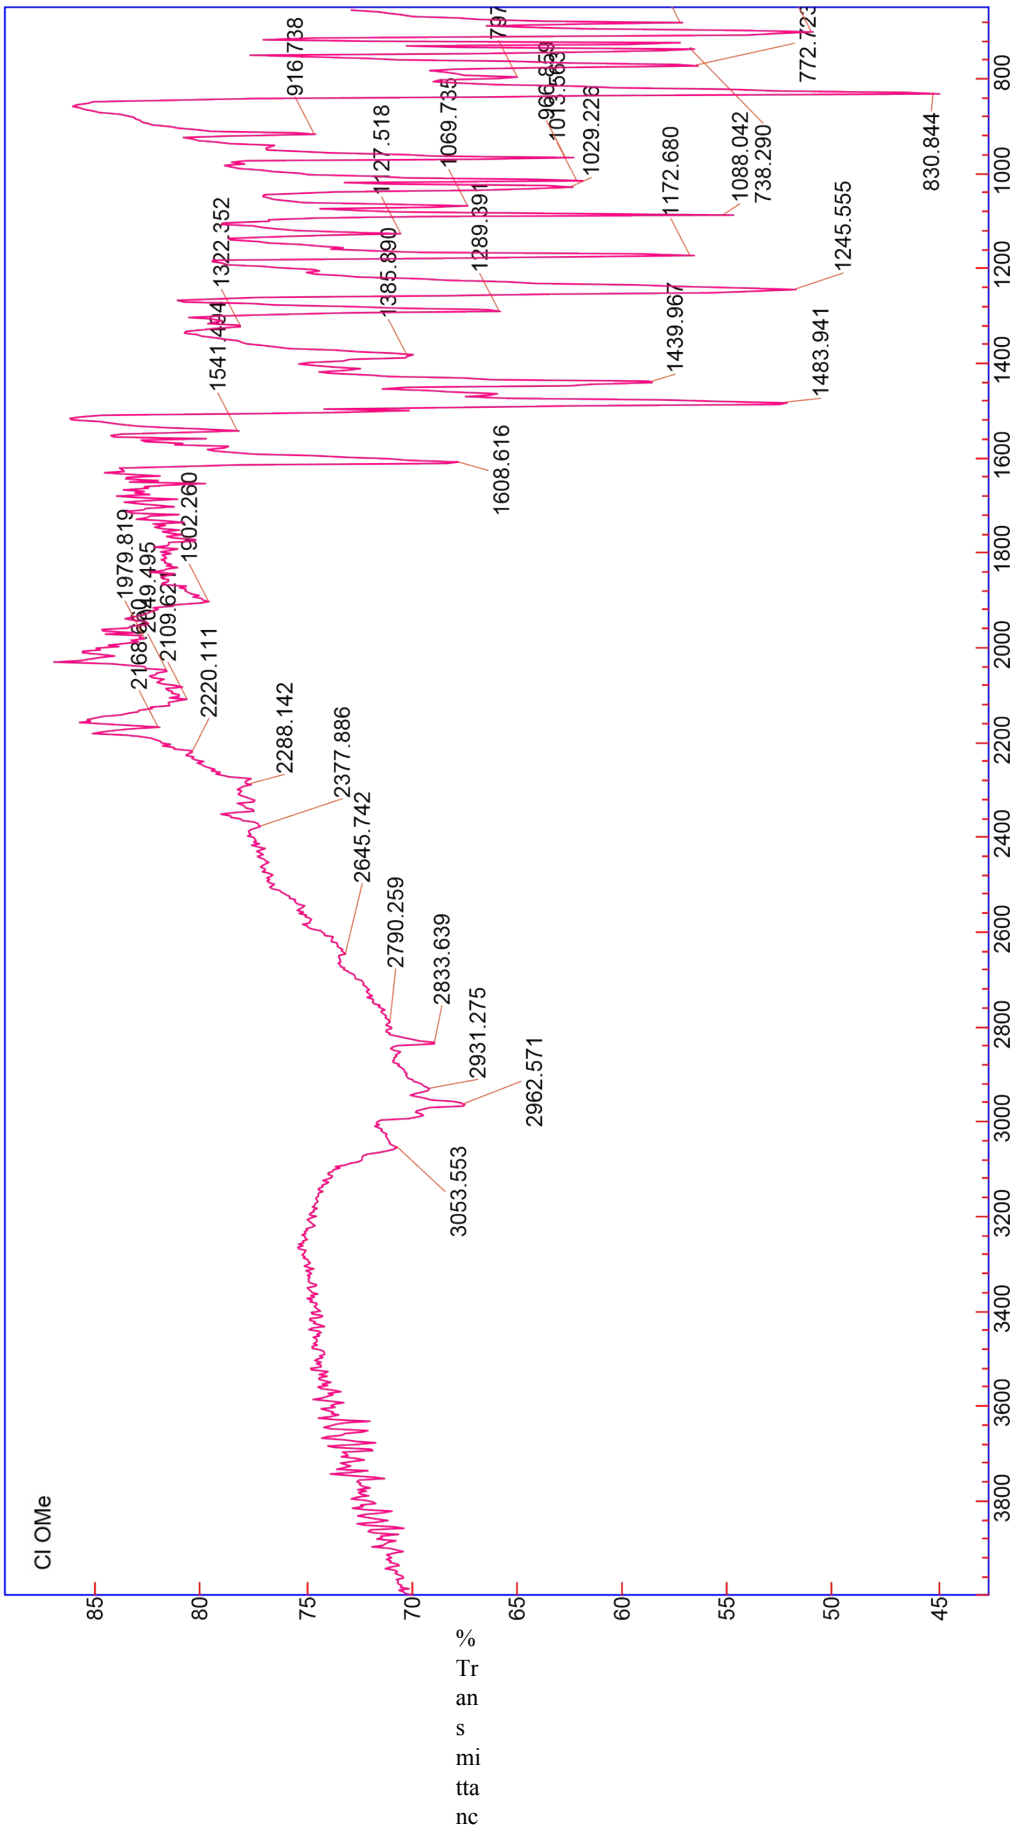

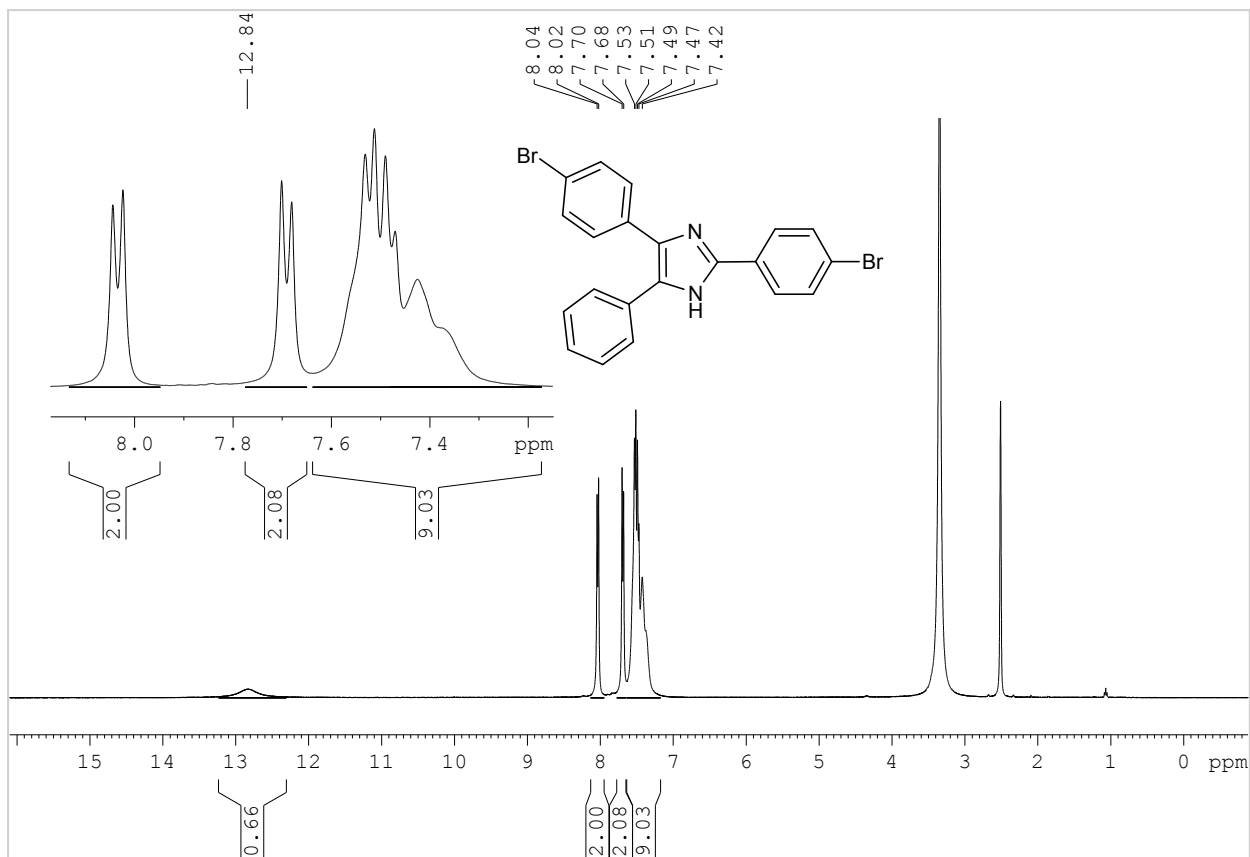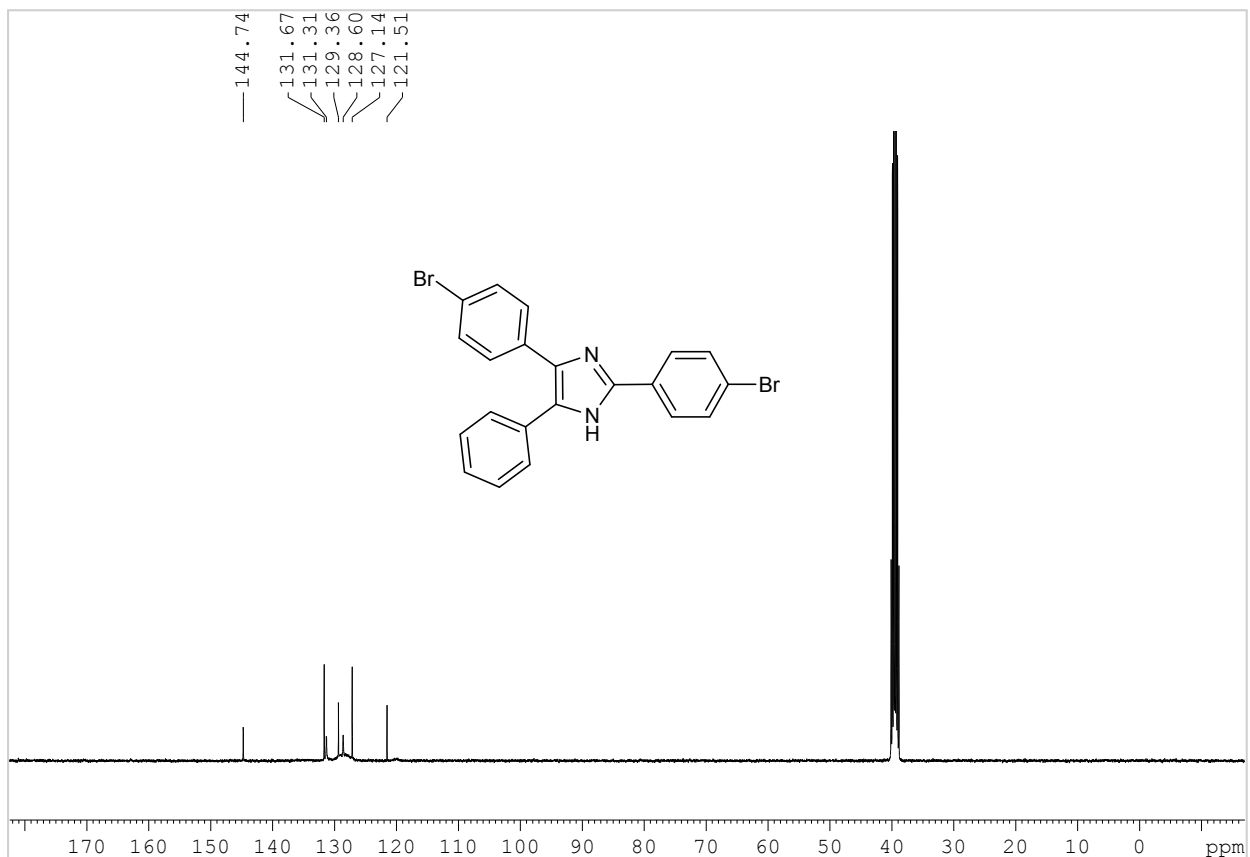

# Elemental Composition Report

## Page 1

### Single Mass Analysis

Tolerance = 5.0 PPM / DBE: min = -1.5, max = 500.0

Element prediction: Off

Number of isotope peaks used for i-FIT = 2

Monoisotopic Mass, Even Electron Ions

12 formula(e) evaluated with 1 results within limits (all results (up to 1000) for each mass) Elements Used:

C: 20-25 H: 10-15 N: 0-5 Br: 0-2

Corr 1 50 (1.653) Cm (1:61)  
TOF MS ES-

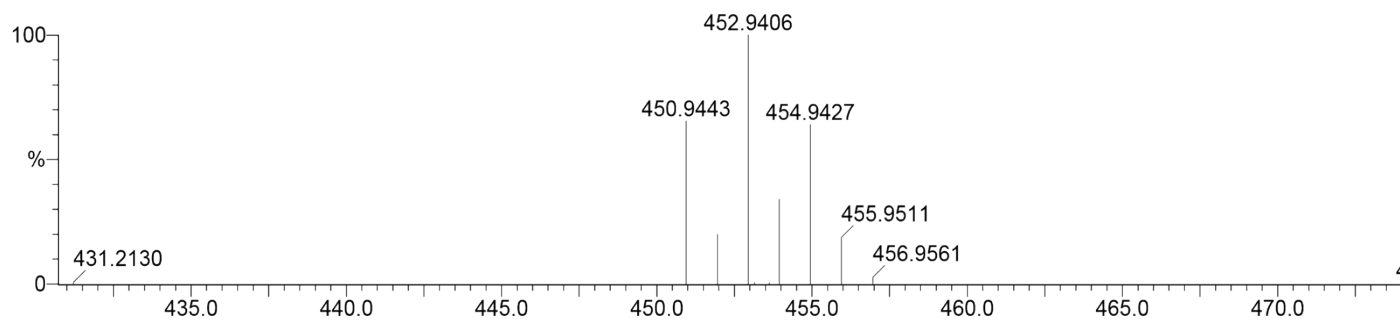

Minimum:

-1.5

Maximum:

5.0

5.0

500.0

| Mass | Calc. Mass | mDa | PPM | DBE | i-FIT | i-FIT (Norm) |
|------|------------|-----|-----|-----|-------|--------------|
|------|------------|-----|-----|-----|-------|--------------|

|            |          |      |      |      |      |     |
|------------|----------|------|------|------|------|-----|
| 450.9443   | 450.9445 | -0.2 | -0.4 | 15.5 | 28.8 | 0.0 |
| H13 N2 Br2 |          |      |      |      |      |     |

C21



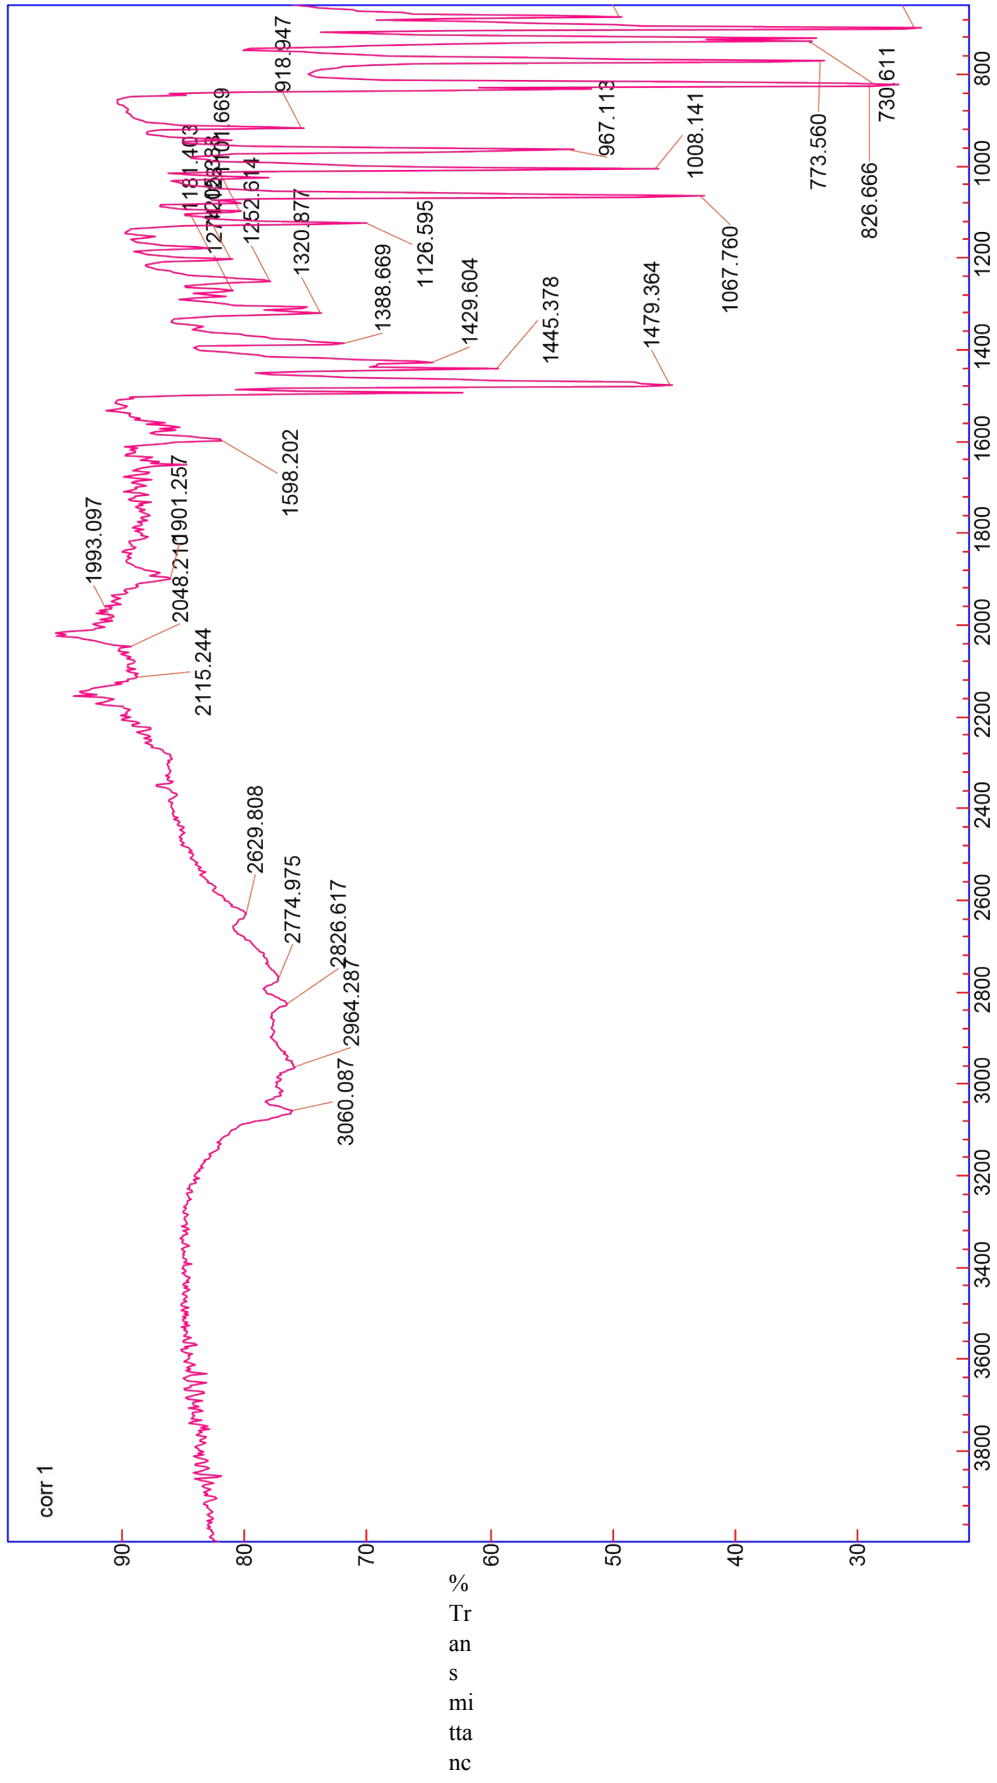

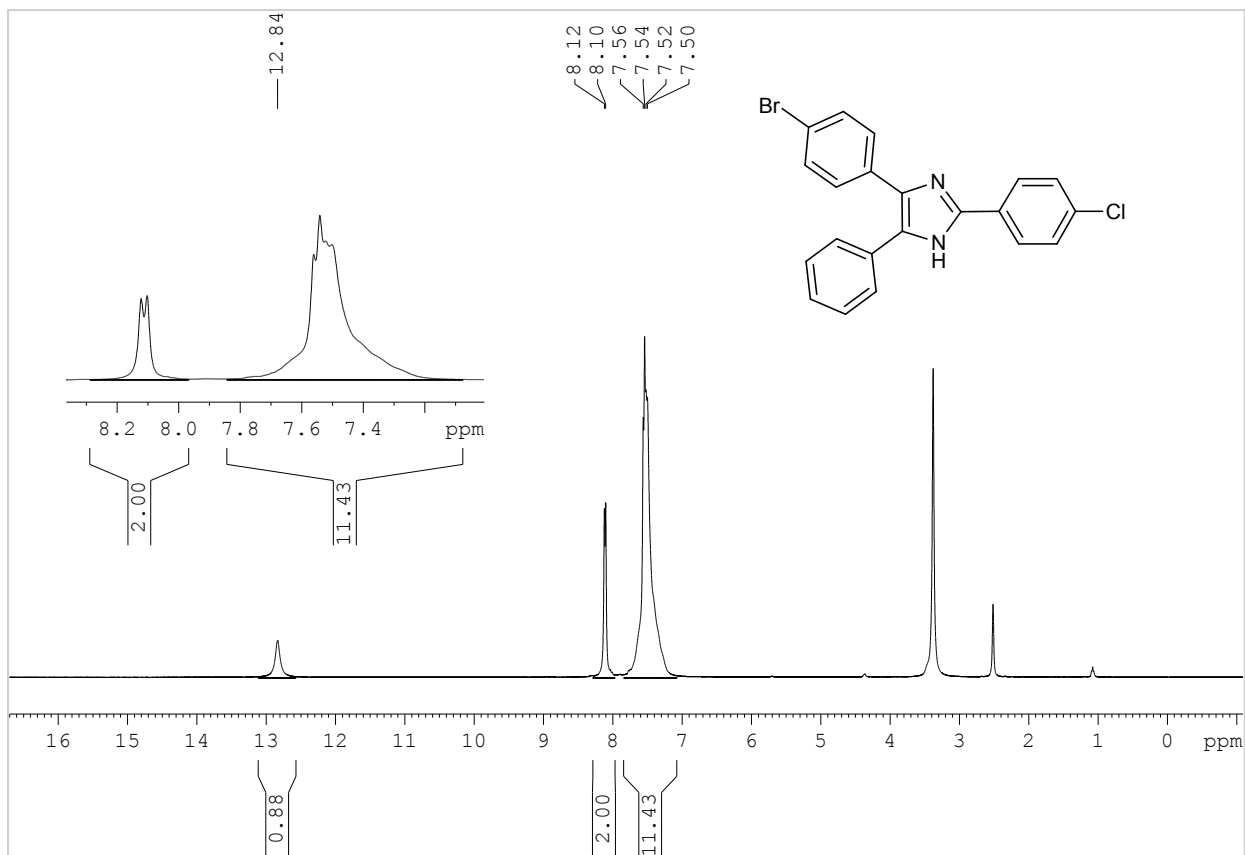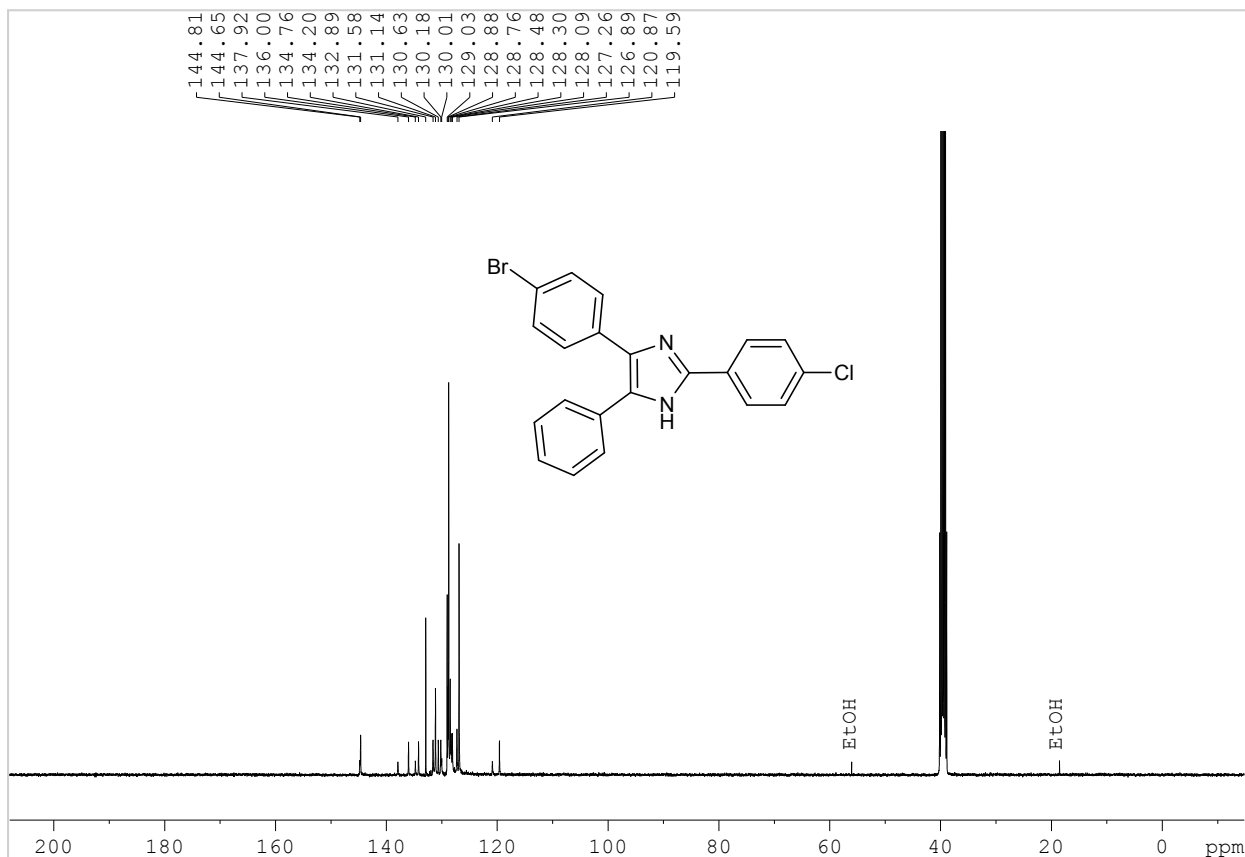

# Elemental Composition Report

## Page 1

### Single Mass Analysis

Tolerance = 5.0 PPM / DBE: min = -1.5, max = 500.0

Element prediction: Off

Number of isotope peaks used for i-FIT = 2

Monoisotopic Mass, Even Electron Ions

12 formula(e) evaluated with 1 results within limits (all results (up to 1000) for each mass) Elements Used:

C: 20-25 H: 10-15 N: 0-5 Cl: 0-1 Br: 0-1

Corr 2 58 (1.923) Cm (1:61)

TOF MS ES-

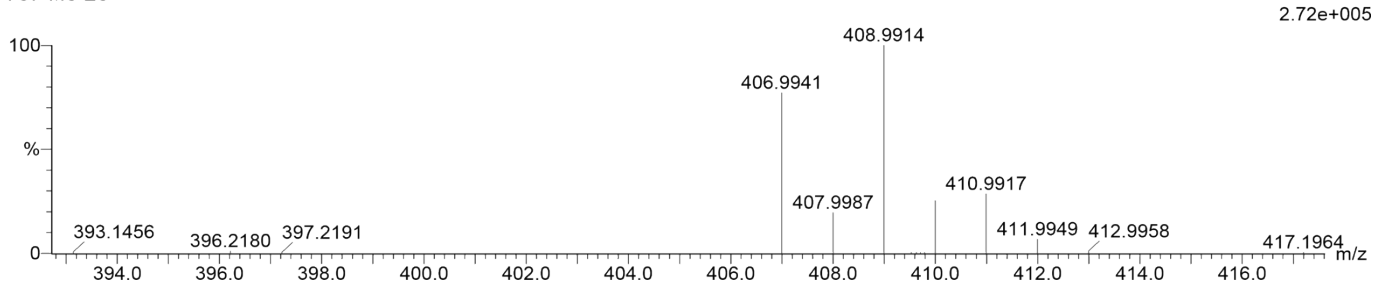

Minimum: -1.5  
Maximum: 5.0 5.0 500.0

| Mass     | Calc. Mass | mDa  | PPM  | DBE  | i-FIT | i-FIT (Norm) | Formula |
|----------|------------|------|------|------|-------|--------------|---------|
| 406.9941 | 406.9951   | -1.0 | -2.5 | 15.5 | 15.4  | 0.0          | C21     |

H13 N2 Cl Br

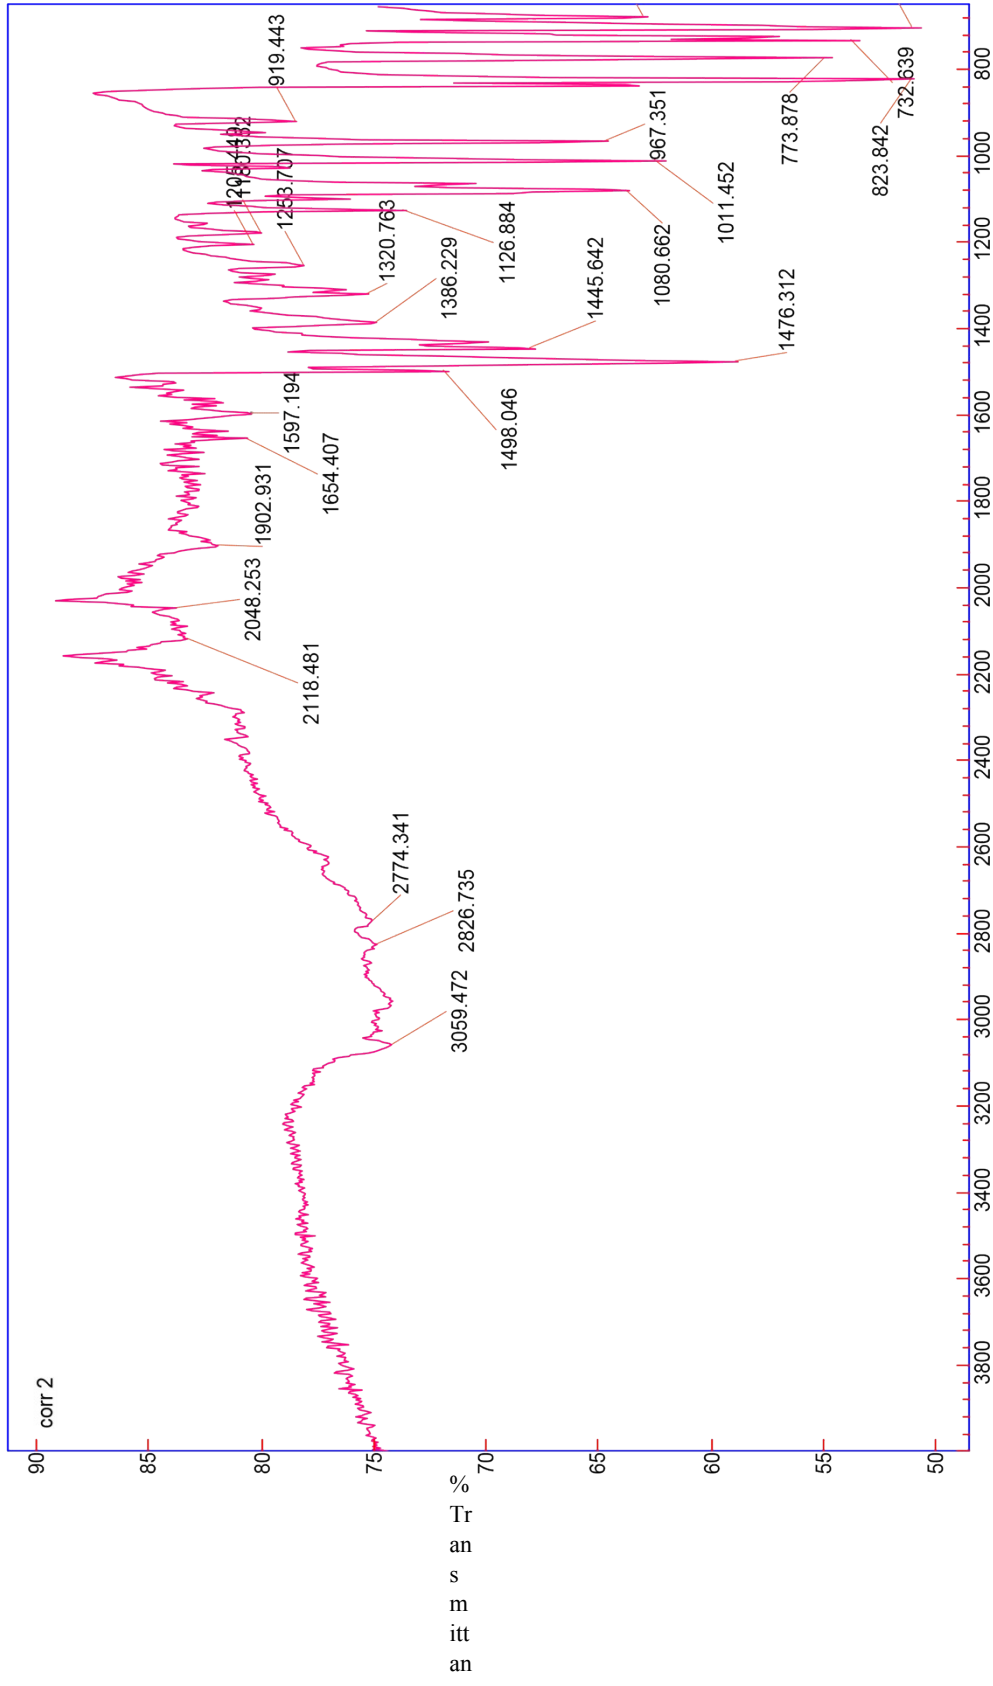

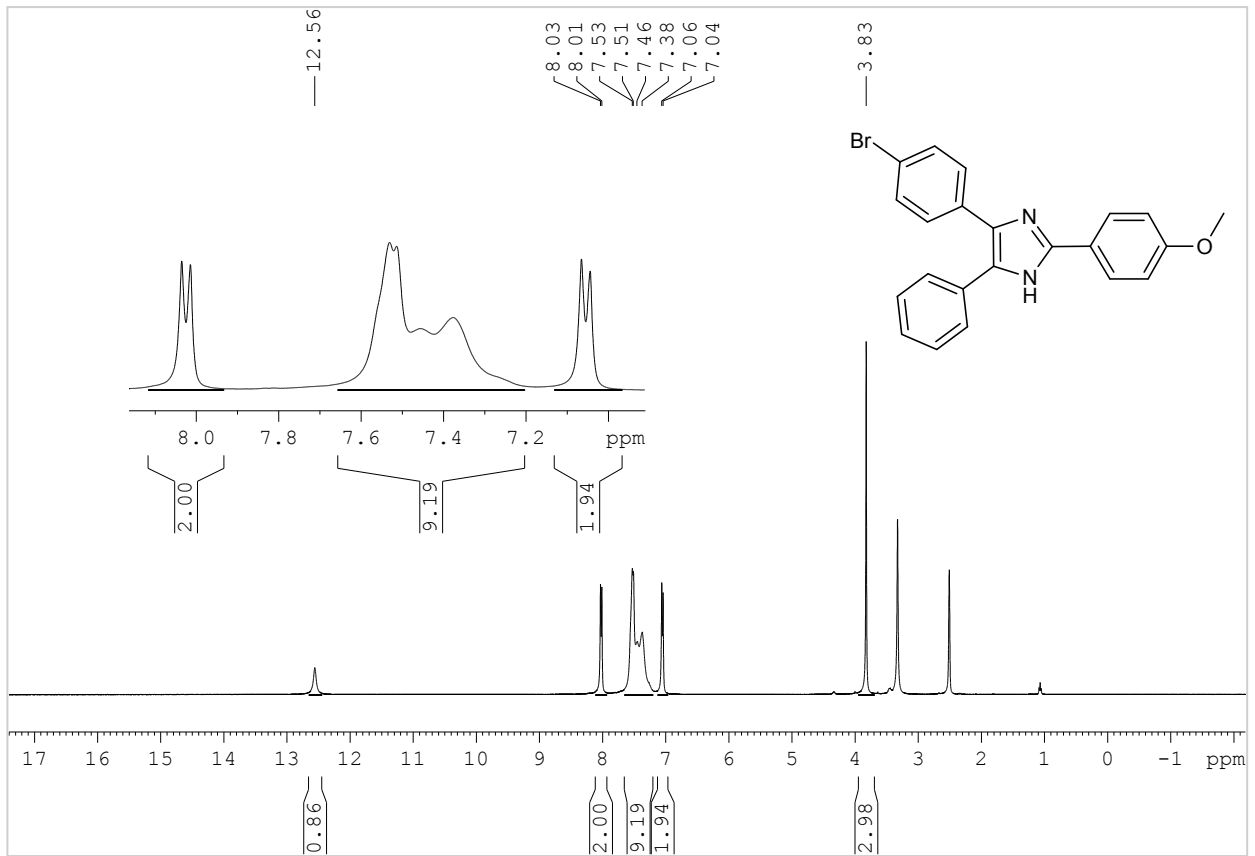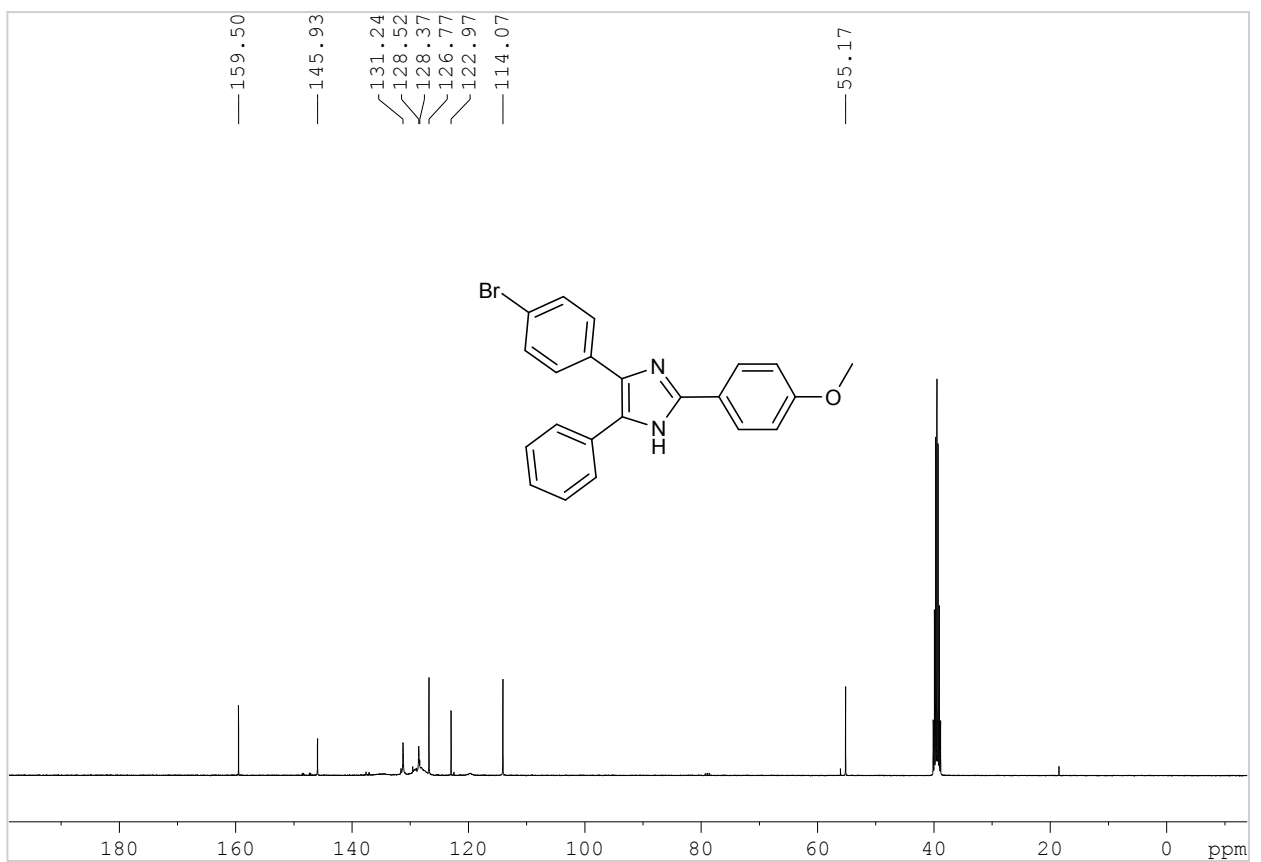

# Elemental Composition Report

## Page 1

### Single Mass Analysis

Tolerance = 5.0 PPM / DBE: min = -1.5, max = 500.0

Element prediction: Off

Number of isotope peaks used for i-FIT = 2

Monoisotopic Mass, Even Electron Ions

32 formula(e) evaluated with 1 results within limits (all results (up to 1000) for each mass)

Elements Used:

C: 20-25 H: 15-20 N: 0-5 O: 0-5 Br: 0-1

Corr 5 39 (1.281) Cm (1:61)

TOF MS ES-

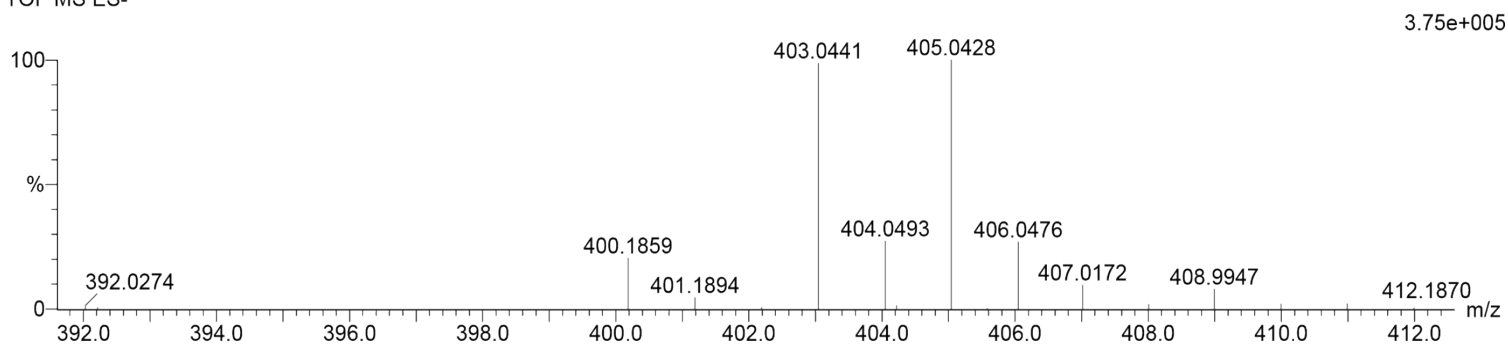

Minimum: -1.5  
Maximum: 5.0 5.0 500.0

| Mass     | Calc. Mass | mDa  | PPM  | DBE  | i-FIT | i-FIT (Norm) | Formula         |
|----------|------------|------|------|------|-------|--------------|-----------------|
| 403.0441 | 403.0446   | -0.5 | -1.2 | 15.5 | 37.1  | 0.0          | C22 H16 N2 O Br |

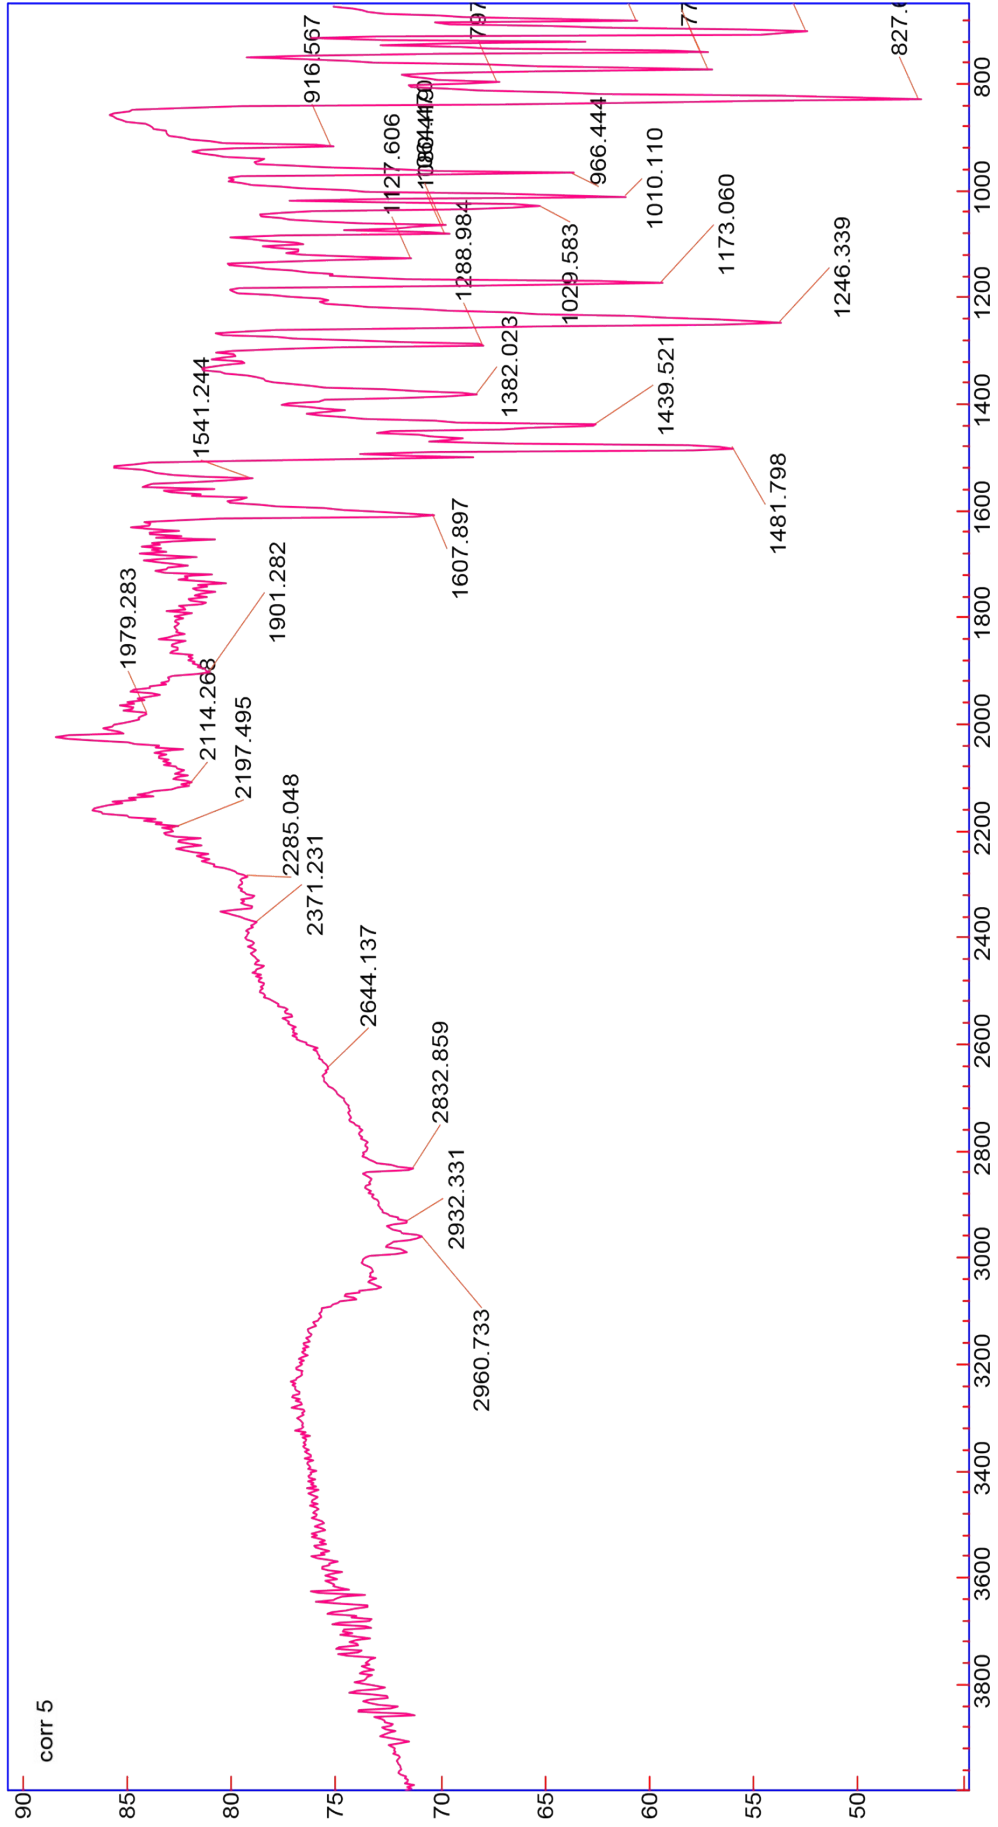

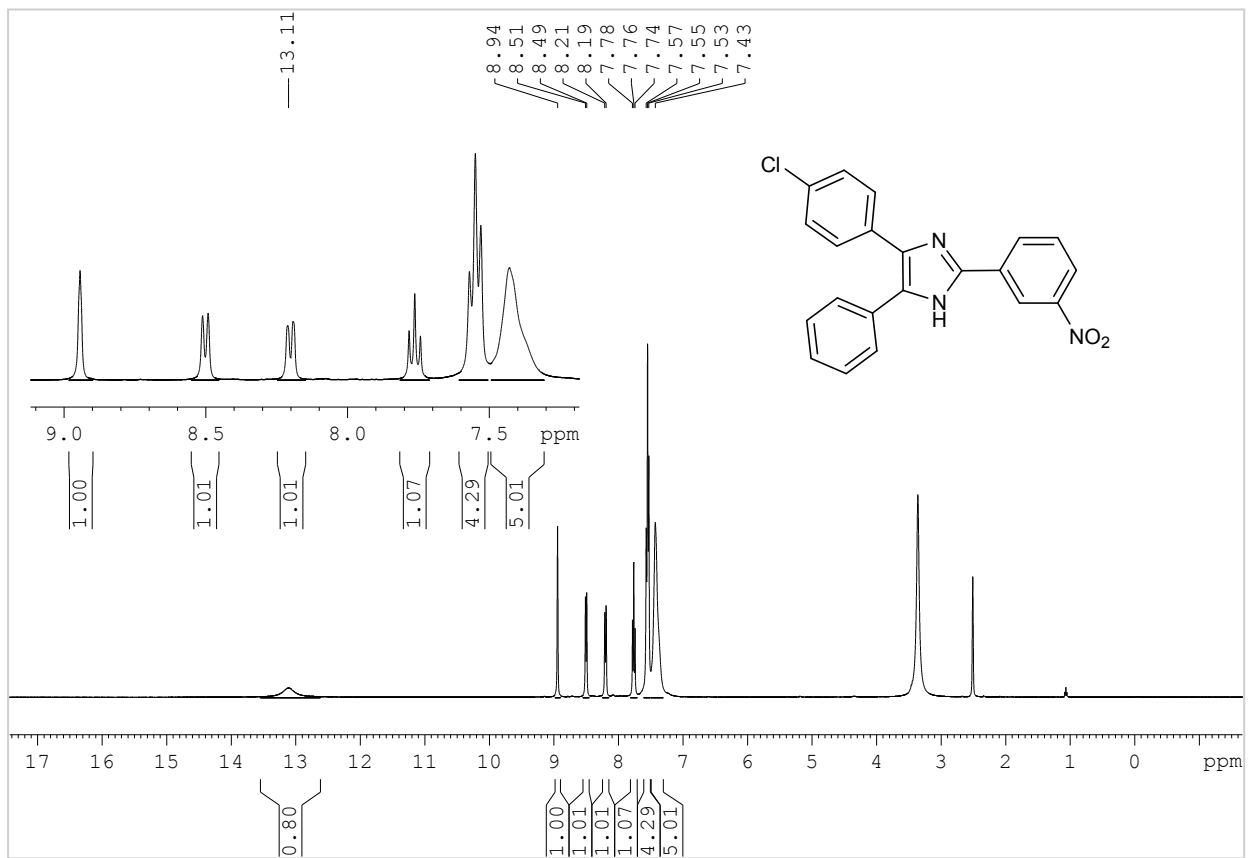



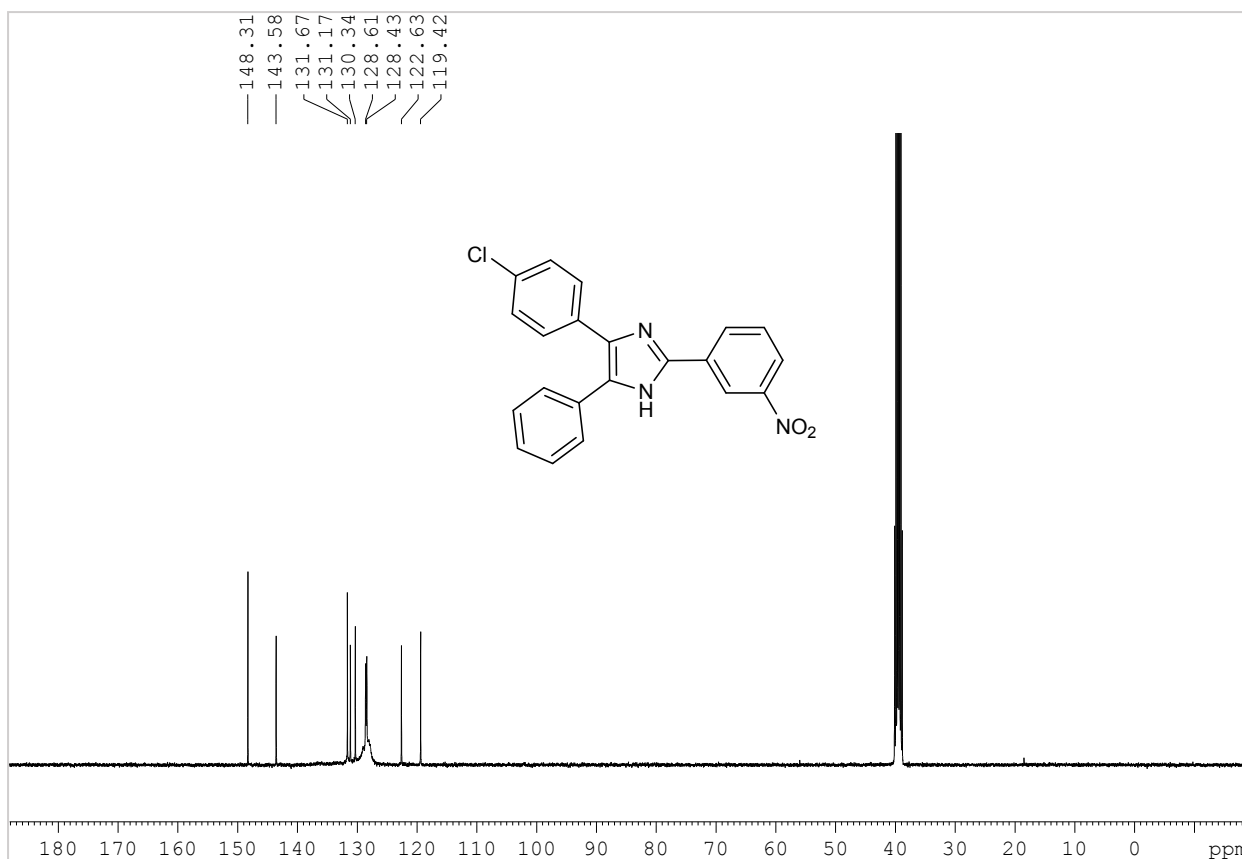

## Elemental Composition Report Page 1

### Single Mass Analysis

Tolerance = 5.0 PPM / DBE: min = -1.5, max = 500.0

Element prediction: Off

Number of isotope peaks used for i-FIT = 2

Monoisotopic Mass, Even Electron Ions

31 formula(e) evaluated with 1 results within limits (all results (up to 1000) for each mass) Elements Used:

C: 20-25 H: 10-15 N: 0-5

O: 0-5 Cl: 0-1 Corr 3 58

(1.922) Cm (1:61)

TOF MS ES-

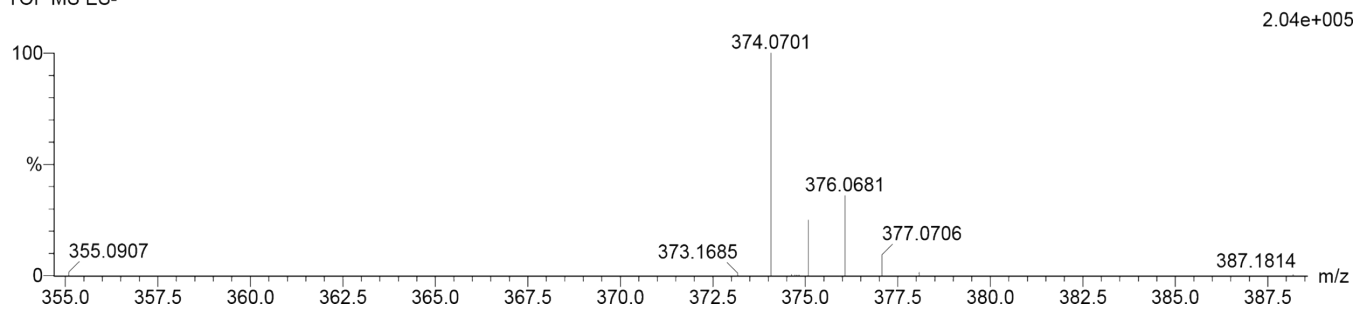

Minimum:

-1.5

Maximum:

5.0

5.0

500.0

2.04e+005

| Mass<br>Formula          | Calc. Mass | mDa | PPM | DBE  | i-FIT | i-FIT (Norm) |     |
|--------------------------|------------|-----|-----|------|-------|--------------|-----|
| 374.0701<br>H13 N3 O2 Cl | 374.0696   | 0.5 | 1.3 | 16.5 | 61.2  | 0.0          | C21 |

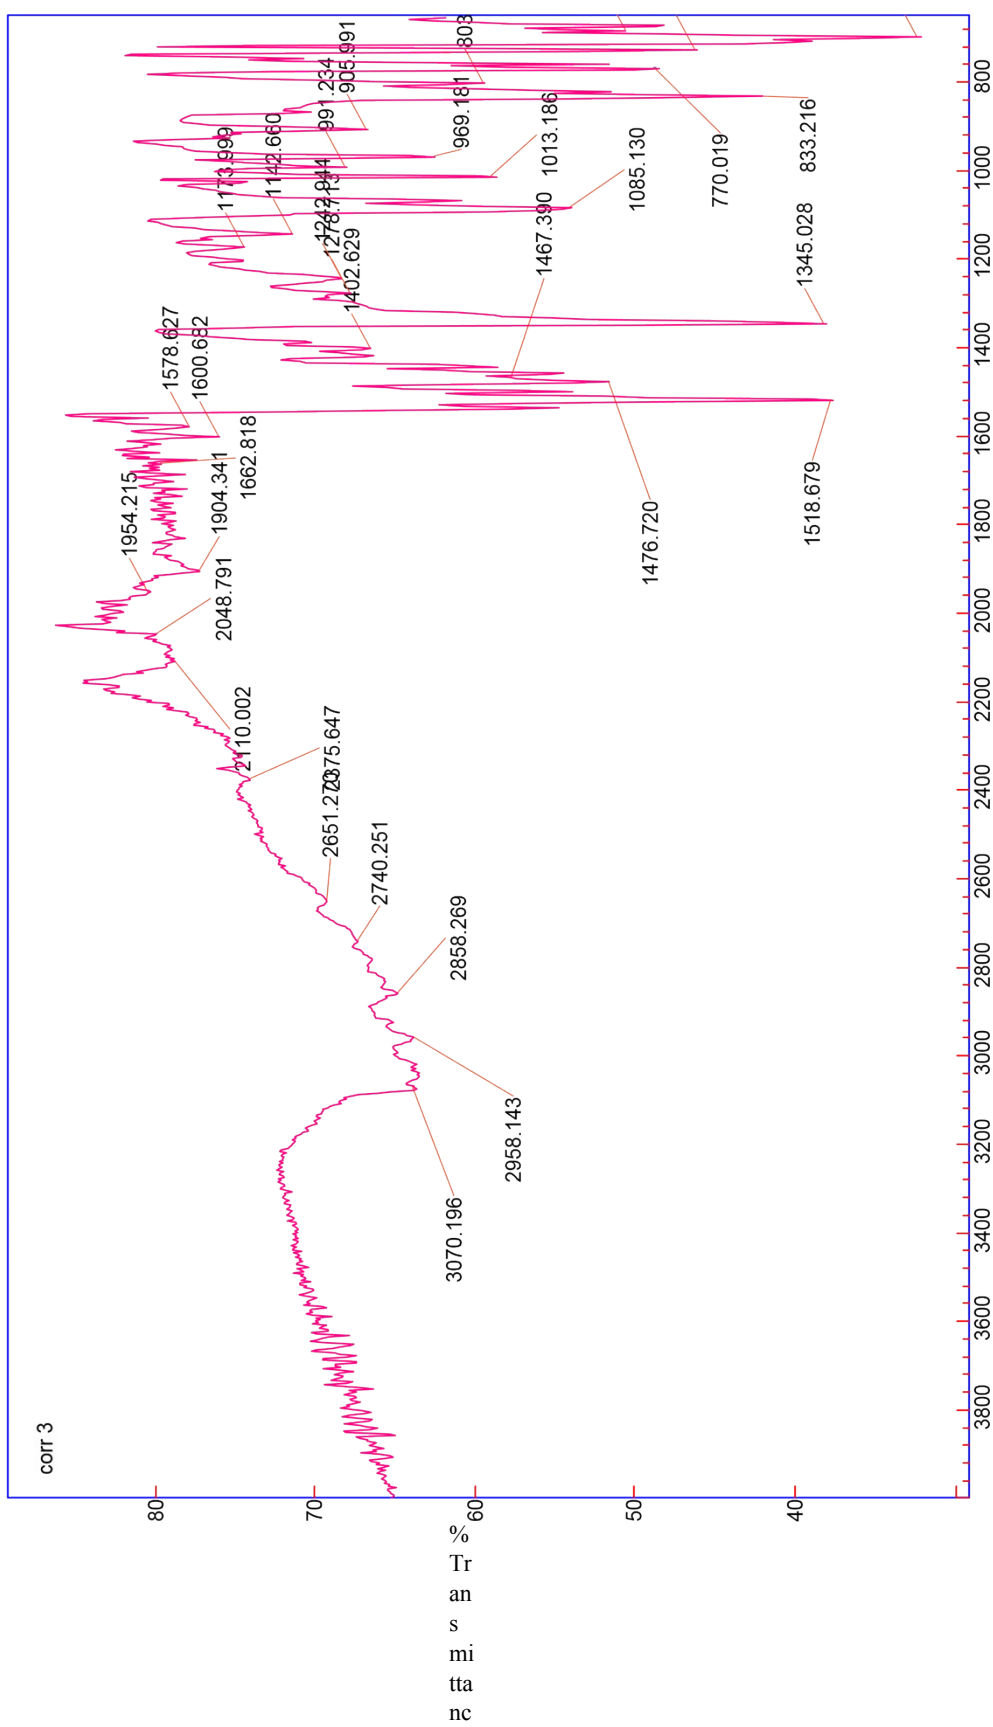

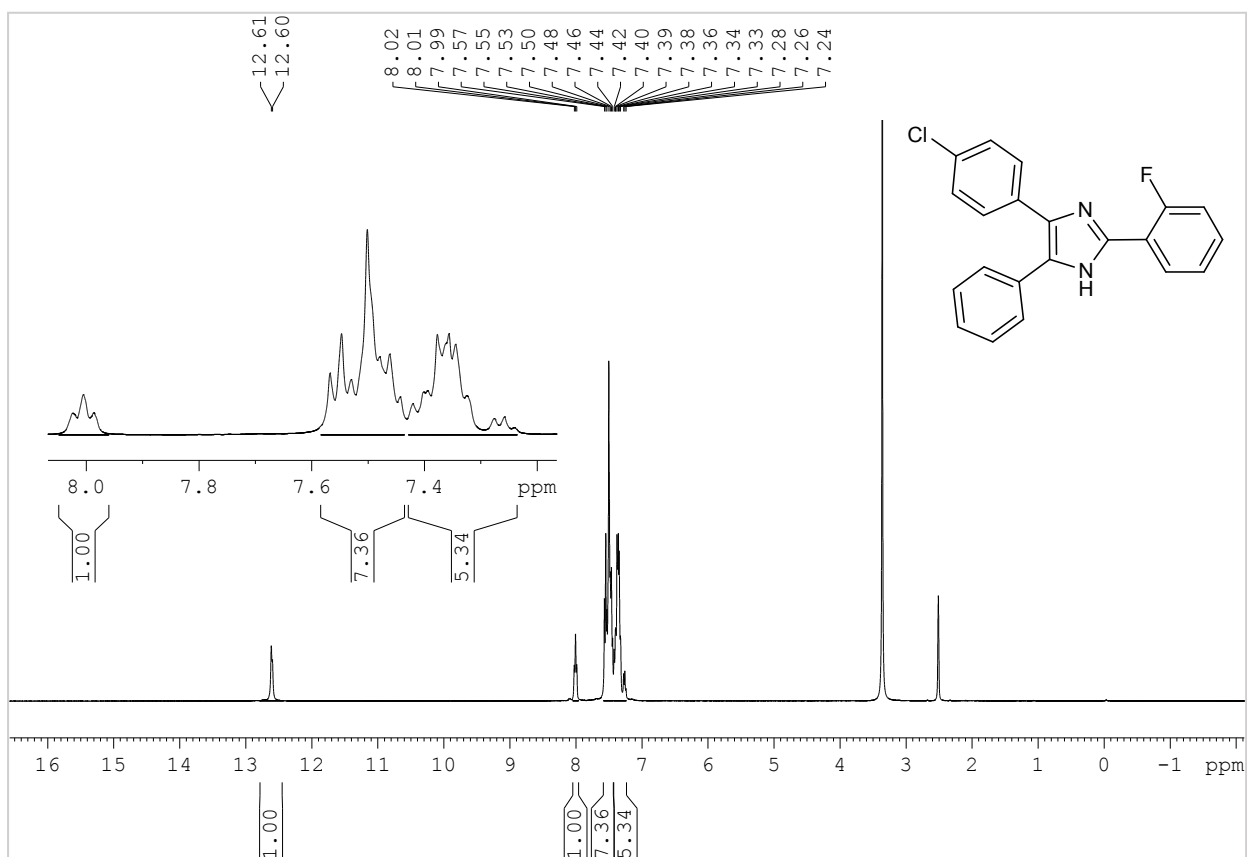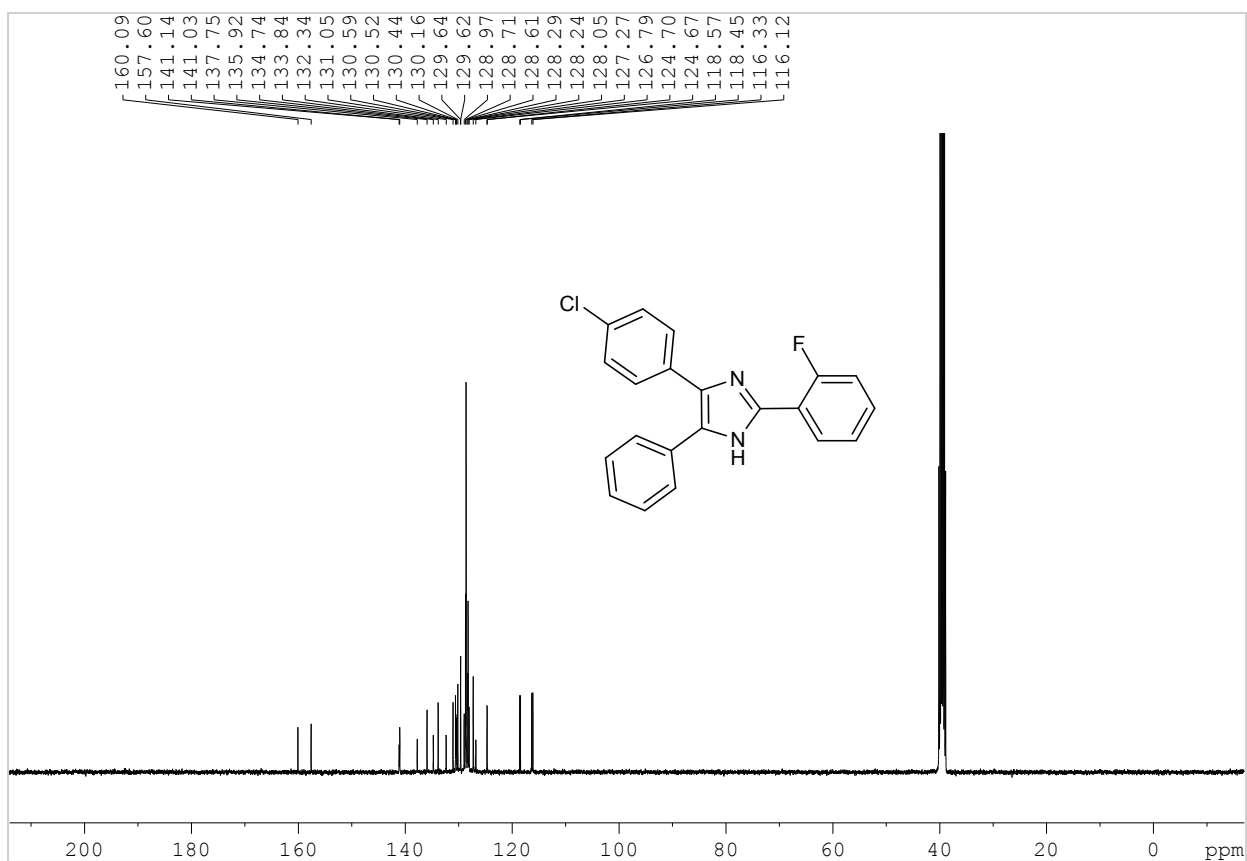

# Elemental Composition Report

## Page 1

### Single Mass Analysis

Tolerance = 5.0 PPM / DBE: min = -1.5, max = 500.0

Element prediction: Off

Number of isotope peaks used for i-FIT = 2

Monoisotopic Mass, Even Electron Ions

11 formula(e) evaluated with 1 results within limits (all results (up to 1000) for each mass) Elements Used:

C: 20-25 H: 10-15 N: 0-5 Cl: 0-1 F: 0-1

Corr 4 58 (1.922) Cm (1:61)  
TOF MS ES-

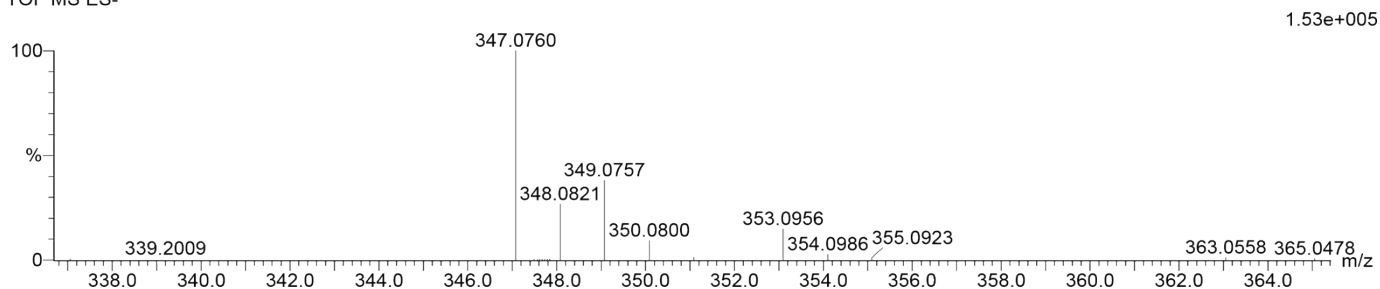

Minimum: -1.5  
Maximum: 5.0 5.0 500.0

| Mass     | Calc. Mass | mDa | PPM | DBE  | i-FIT | i-FIT (Norm) | Formula |
|----------|------------|-----|-----|------|-------|--------------|---------|
| 347.0760 | 347.0751   | 0.9 | 2.6 | 15.5 | 108.7 | 0.0          | C21     |
| H13      | N2         | Cl  | F   |      |       |              |         |

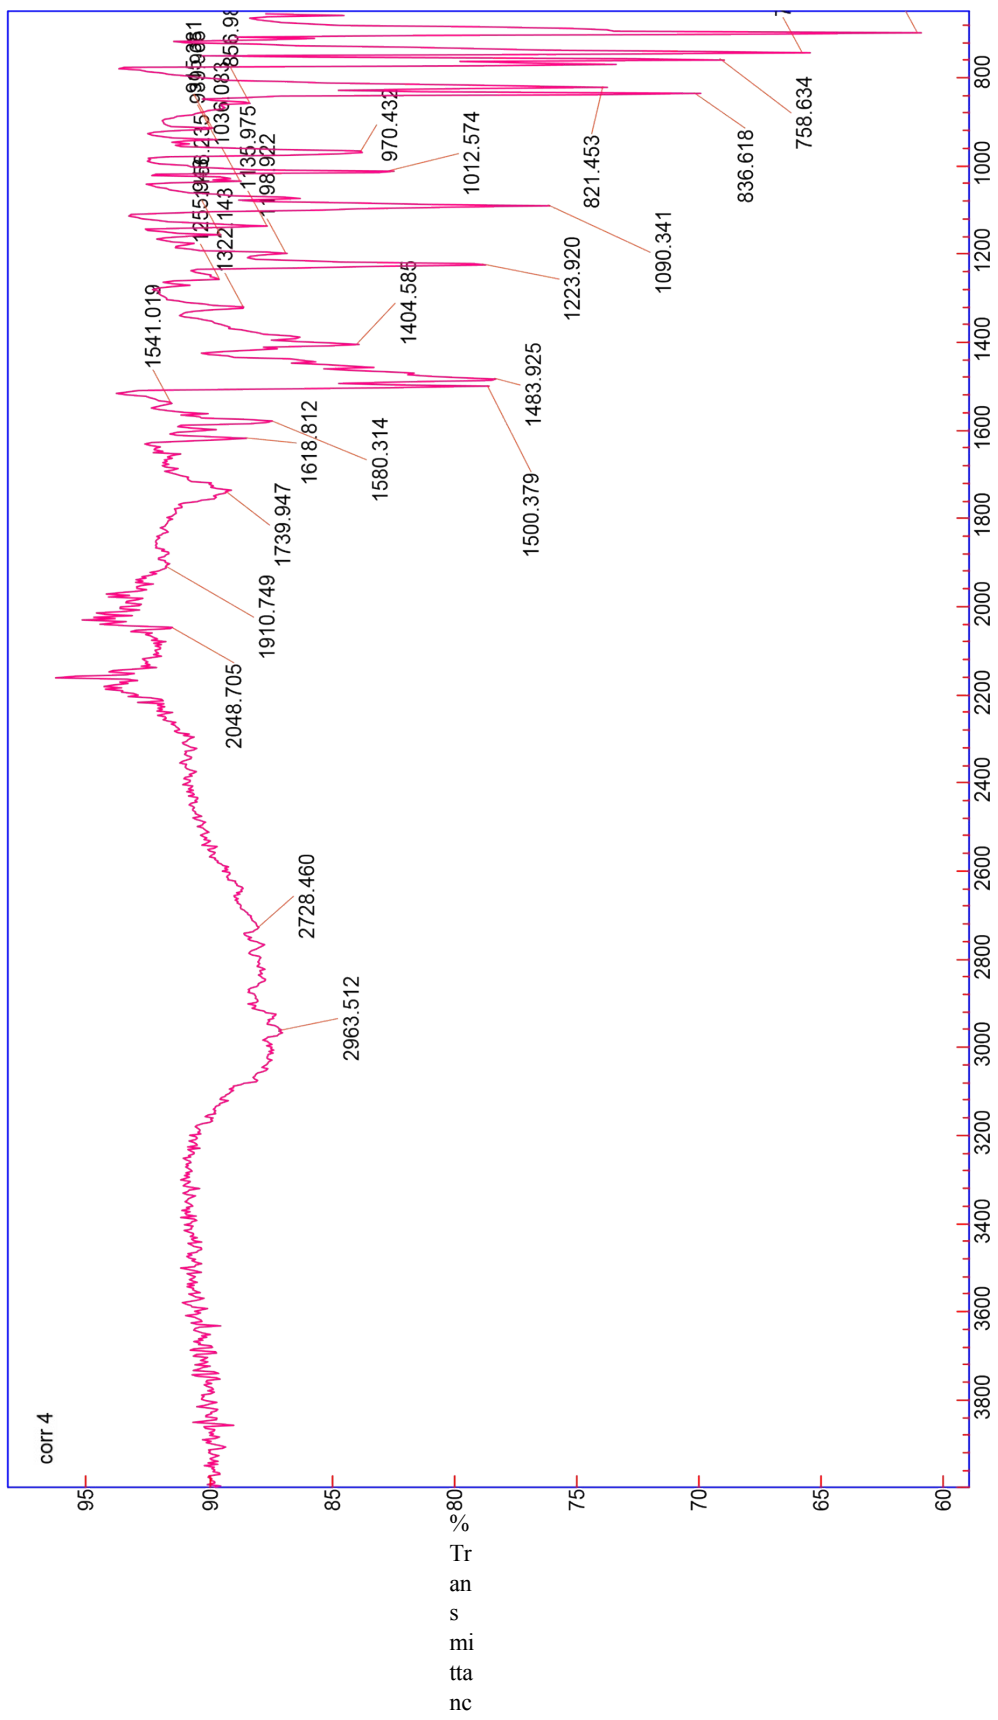

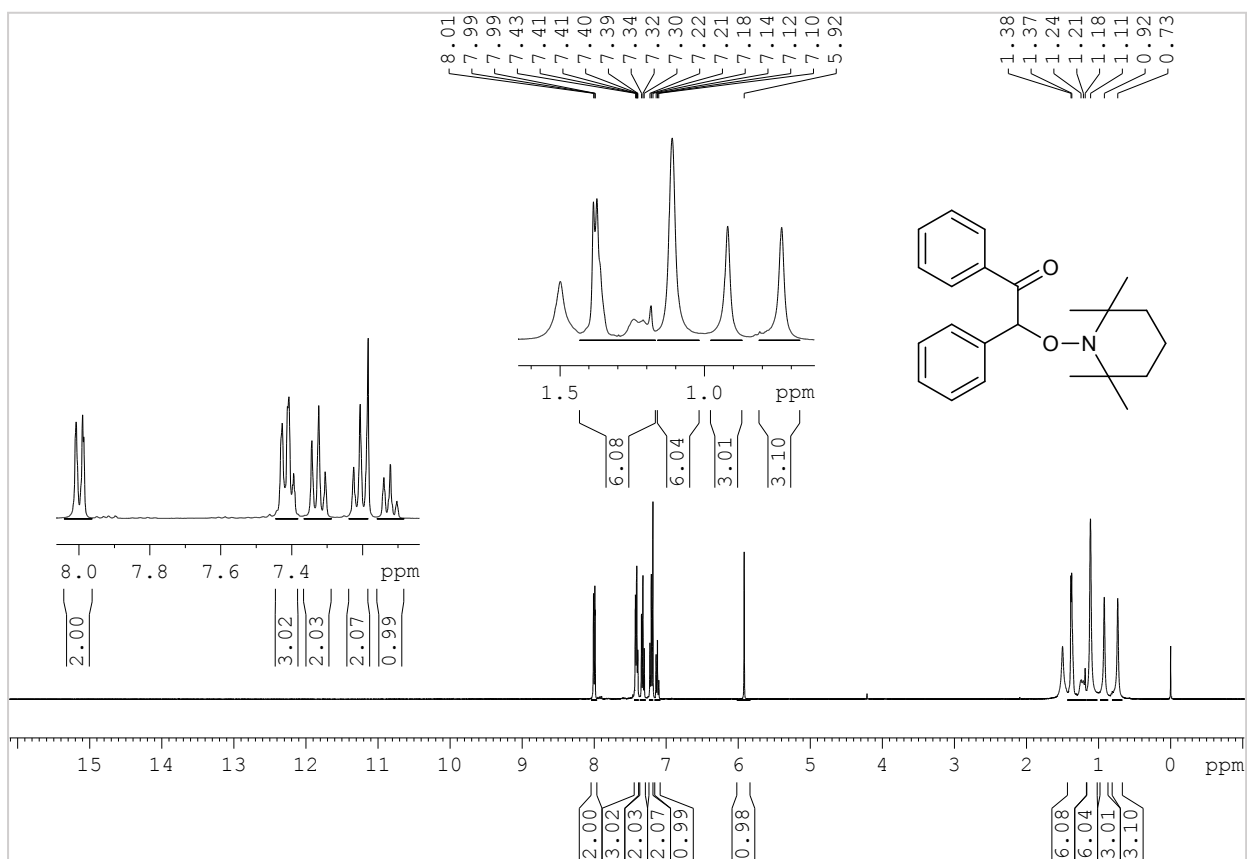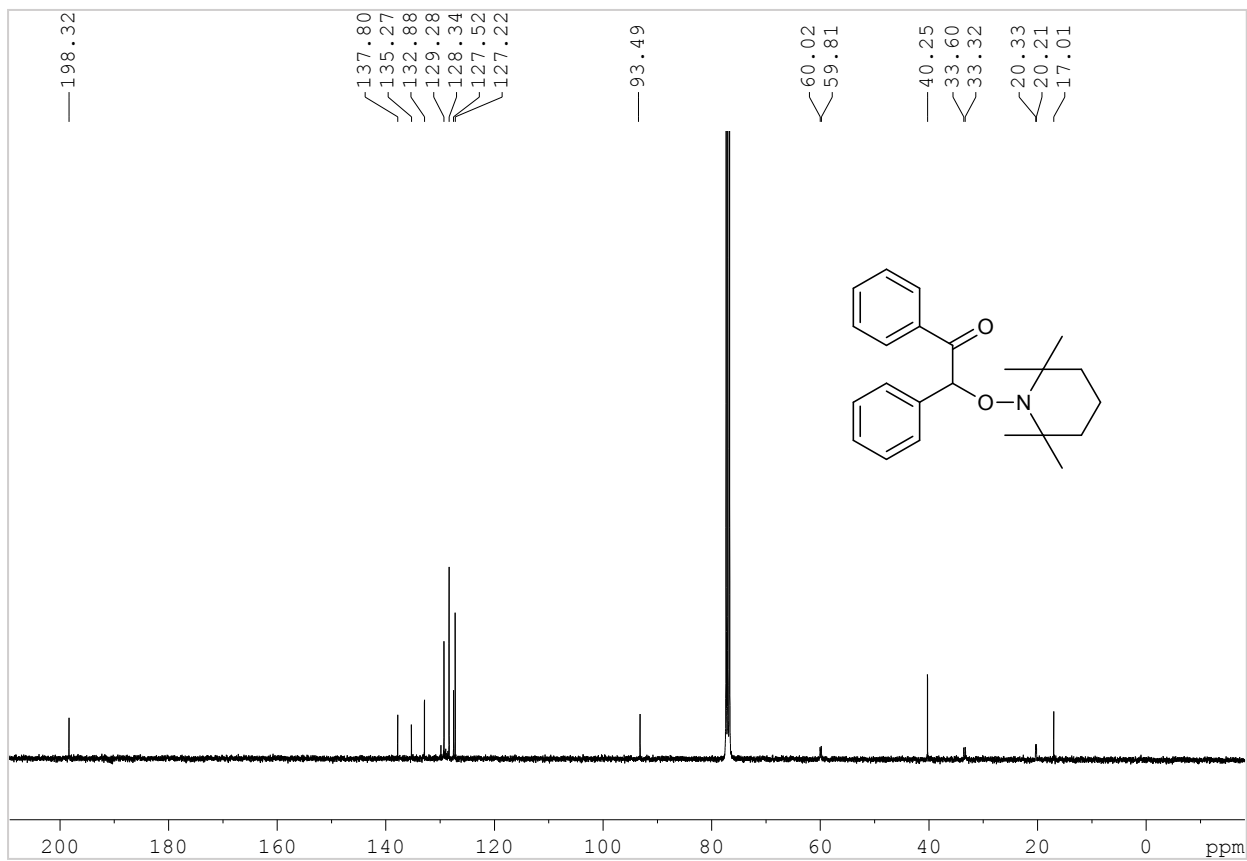

Supplement: RA-008-C8RA07238H-s001.pdf [file RA-008-C8RA07238H-s001.pdf]
